# Supplementary material for: On the role of stereo-electronic effects in tuning the selectivity and rate of DNA alkylation by duocarmycins
Source: Royal Society of Chemistry journal article supplement (doi:10.1039/b514890a), 2006-01-01
Supplement: b514890a.pdf [file b514890a.pdf]

# **On the role of stereo-electronic effects in tuning the selectivity and rate of DNA alkylation by duocarmycins**

**Paola Cimino,<sup>a,b</sup> Giuseppe Bifulco,<sup>b</sup> Raffaele Riccio,<sup>b</sup> Luigi Gomez-Paloma<sup>b</sup> and Vincenzo Barone<sup>\*,a</sup>**

<sup>a</sup>*Dipartimento di Chimica, Università Federico II, Complesso Universitario Monte S. Angelo, via Cintia, I-80126 Napoli, Italy. E-mail: baronev@unina.it*

<sup>b</sup>*Dipartimento di Scienze Farmaceutiche, Università di Salerno, via Ponte don Melillo, 84084, Fisciano (SA), Italy*

## Supporting Information

List of contents:

1. **Figure SI-1** (S-3)
2. **Figure SI-2** (S-3)
3. **Figure SI-3** (S-3)
4. **Table SI-1** (S-4)
5. **Table SI-2** (S-5)
6. **Table SI-3** (S-6)
7. **Table SI-4** (S-6)
8. **Table SI-5** (S-7)
9. **Table SI-6** (S-8)
10. optimized structures and corresponding transition-state structures:

**ch3oh** (S-9); **ch3nh2** (S-9); **pyridine** (S-10); **adenine** (S-11); **guanine** (S-12); ***N*-Boc-CPI** (S-13); **CPI** (S-15); **DSI** (S-18); **DSA** (S-21); ***N*-Boc-CPI in water** (S-25); **CPI in water** (S-27); **DSI in water** (S-30); **DSA in water** (S-33); ***N*-Boc-CPI with 1 explicit water molecule** (S-36); ***N*-Boc-CPI with 2 explicit water molecules** (S-39); **transition state of *N*-Boc-CPI with pyridine** (S-42); **transition state of *N*-Boc-CPI with pyridine with 1 explicit water molecule** (S-45); **transition state of *N*-Boc-CPI with pyridine with 2 explicit water molecules** (S-49); **transition state of CPI with pyridine** (S-52); **transition state of CPI with adenine** (S-56); **transition state of CPI with guanine** (S-59); **transition state of DSI with pyridine** (S-63); **transition state of DSI with adenine** (S-66); **transition state of DSA with pyridine** (S-70); **transition state of DSA with adenine** (S-75).

11. **Full references** (S-80)

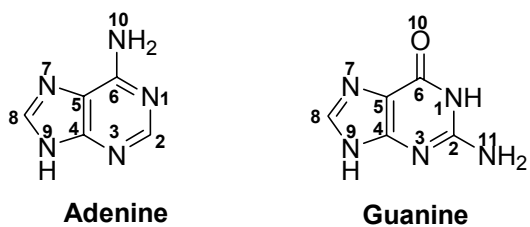

**Fig. SI-1:** Structure of the studied DNA bases (adenine and guanine).

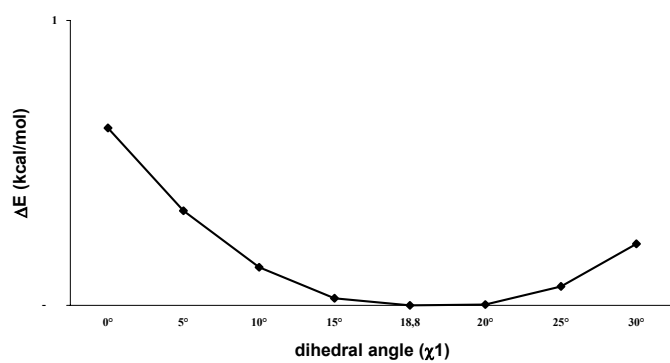

**Fig. SI-2:** Energy change [PBE0/6-31G(d)] vs. variation of the dihedral angle ( $\chi_1$ ) of **3**.

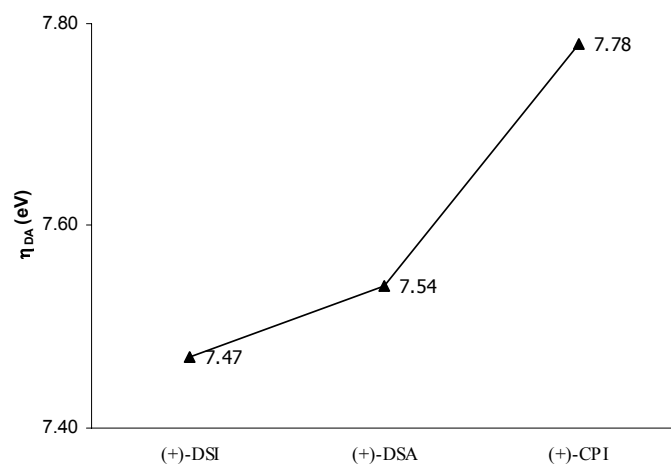

**Fig. SI-3:** Reactivity indice hardness  $\eta_{DA}$  in eV (298.15 K, 1 atm) in the gas phase [PBE0/6-31G(d)] for the compounds **1**, **2** and **3** with adenine. See text for details.

**Table SI-1:** Bond lengths and dihedral angles for the reactant structures optimized for the gas phase and for water solution (PBEO/6-31G(d)).

| <i>Gas phase</i> |         |         |         |                        |
|------------------|---------|---------|---------|------------------------|
| (PBEO/6-31G (d)) | (+)DSA  | (+)DSI  | (+)CPI  | (+)- <i>N</i> -Boc-CPI |
| C1-C2 (Å)        | 1.485   | 1.484   | 1.485   | 1.485                  |
| C1-C10 (Å)       | 1.528   | 1.528   | 1.528   | 1.528                  |
| C2-C10 (Å)       | 1.515   | 1.515   | 1.515   | 1.518                  |
| C2-C3 (Å)        | 1.510   | 1.510   | 1.511   | 1.511                  |
| C3-N4 (Å)        | 1.468   | 1.469   | 1.468   | 1.470                  |
| N4-C5 (Å)        | 1.403   | 1.404   | 1.406   | 1.399                  |
| C5-C10 (Å)       | 1.484   | 1.484   | 1.484   | 1.485                  |
| C5-C6(Å)         | 1.354   | 1.354   | 1.353   | 1.353                  |
| C6-C7 (Å)        | 1.466   | 1.467   | 1.470   | 1.467                  |
| C7-C8 (Å)        | 1.462   | 1.462   | 1.454   | 1.456                  |
| C8-C9 (Å)        | 1.390   | 1.390   | 1.383   | 1.383                  |
| C9-C10 (Å)       | 1.463   | 1.464   | 1.464   | 1.464                  |
| C7-O11 (Å)       | 1.228   | 1.227   | 1.229   | 1.230                  |
| ∠(C6-C5-C10-C2)  | 166.7°  | 166.5°  | 166.3°  |                        |
| ∠(C6-C5-C10-C1)  | -131.1° | -131.3° | -131.5° |                        |
| ∠(C6-C5-C10-C9)  | 14.8°   | 14.7°   | 14.4°   |                        |
| ∠(C8-C9-C10-C5)  | -13.2°  | -13.1°  | -12.9°  |                        |

---

| <i>Solvent</i>       |        |        |        |
|----------------------|--------|--------|--------|
| (PCM-PBEO/6-31G (d)) | (+)DSA | (+)DSI | (+)CPI |
| C1-C2 (Å)            | 1.480  | 1.480  | 1.480  |
| C1-C10 (Å)           | 1.534  | 1.534  | 1.534  |
| C2-C10 (Å)           | 1.519  | 1.519  | 1.520  |
| C2-C3 (Å)            | 1.510  | 1.510  | 1.511  |
| C3-N4 (Å)            | 1.474  | 1.474  | 1.473  |
| N4-C5 (Å)            | 1.398  | 1.398  | 1.402  |
| C5-C10 (Å)           | 1.478  | 1.477  | 1.478  |
| C5-C6(Å)             | 1.359  | 1.358  | 1.356  |
| C6-C7 (Å)            | 1.459  | 1.459  | 1.465  |
| C7-C8 (Å)            | 1.457  | 1.457  | 1.448  |
| C8-C9 (Å)            | 1.394  | 1.394  | 1.391  |
| C9-C10 (Å)           | 1.461  | 1.461  | 1.461  |
| C7-O11 (Å)           | 1.238  | 1.237  | 1.240  |

**Table SI-2:** Bond lengths and dihedral angles for the transition state structures optimized for the gas phase (PBE0/6-31G(d)).

| <i>Gas phase</i> (PBE0/6-31G (d)) | <b>TS-1</b> | <b>TS-2</b> | <b>TS-3</b> | <b>TS-4</b> |
|-----------------------------------|-------------|-------------|-------------|-------------|
| <b>Pyridine</b>                   |             |             |             |             |
| <u>Nu</u> -C1 (Å)                 | 1.931       | 1.910       | 1.905       | 1.898       |
| C1-C10 (Å)                        | 2.074       | 2.086       | 2.090       | 2.090       |
| C2-C10 (Å)                        | 1.487       | 1.485       | 1.484       | 1.485       |
| C2-C3 (Å)                         | 1.531       | 1.522       | 1.523       | 1.524       |
| C3-N4 (Å)                         | 1.463       | 1.464       | 1.464       | 1.465       |
| N4-C5 (Å)                         | 1.409       | 1.423       | 1.424       | 1.418       |
| C5-C10 (Å)                        | 1.436       | 1.426       | 1.428       | 1.429       |
| C5-C6(Å)                          | 1.376       | 1.374       | 1.372       | 1.372       |
| C6-C7 (Å)                         | 1.450       | 1.451       | 1.454       | 1.453       |
| C7-C8 (Å)                         | 1.456       | 1.458       | 1.450       | 1.451       |
| C8-C9 (Å)                         | 1.405       | 1.404       | 1.396       | 1.396       |
| C9-C10 (Å)                        | 1.422       | 1.424       | 1.423       | 1.424       |
| C7-O11 (Å)                        | 1.239       | 1.239       | 1.242       | 1.241       |
| <b>Adenine</b>                    |             |             |             |             |
| <i>Gas-Phase</i> (PBE0/6-31G (d)) | <b>TS-1</b> | <b>TS-2</b> | <b>TS-3</b> | <b>TS-3</b> |
| <u>Nu</u> -C1 (Å)                 | 1.908       | 1.908       | 1.892       | 1.826       |
| C1-C10 (Å)                        | 2.118       | 2.117       | 2.128       | 2.162       |
| C2-C10 (Å)                        | 1.492       | 1.491       | 1.490       | 1.485       |
| C2-C3 (Å)                         | 1.522       | 1.522       | 1.522       | 1.526       |
| C3-N4 (Å)                         | 1.465       | 1.465       | 1.464       | 1.464       |
| N4-C5 (Å)                         | 1.430       | 1.431       | 1.432       | 1.429       |
| C5-C10 (Å)                        | 1.420       | 1.421       | 1.422       | 1.421       |
| C5-C6(Å)                          | 1.375       | 1.375       | 1.375       | 1.376       |
| C6-C7 (Å)                         | 1.449       | 1.450       | 1.452       | 1.452       |
| C7-C8 (Å)                         | 1.457       | 1.467       | 1.449       | 1.450       |
| C8-C9 (Å)                         | 1.406       | 1.406       | 1.398       | 1.397       |
| C9-C10 (Å)                        | 1.423       | 1.423       | 1.422       | 1.420       |
| C7-O11 (Å)                        | 1.240       | 1.241       | 1.244       | 1.243       |
| <b>α</b> (C6-C5-C10-C2)           | -178.2°     | -178.0°     | -177.7°     | -175.3°     |
| <b>β</b> (C6-C5-C10-C1)           | -131.4°     | -131.1°     | -131.1°     | -129.1°     |
| <b>γ</b> (C6-C5-C10-C9)           | 0.48°       | 0.35°       | 0.04°       | -0.9°       |
| <b>δ</b> (C8-C9-C10-C5)           | -0.82°      | -0.8°       | -0.4°       | 0.4°        |

**Table SI-3:** Bond lengths and dihedral angles for the product structures optimized for the gas phase (PBE0/6-31G(d)).

| <i>Gas phase</i> (PBE0/6-31G (d)) | <b>P-1</b>     | <b>P-2</b> | <b>P-3</b>     | <b>P-3</b> |
|-----------------------------------|----------------|------------|----------------|------------|
|                                   | <b>Adenine</b> |            | <b>Guanine</b> |            |
| Nu-C1 (Å)                         | 1.470          | 1.470      | 1.478          |            |
| C1-C10 (Å)                        | 2.458          | 2.455      | 2.455          |            |
| C2-C10 (Å)                        | 1.482          | 1.481      | 1.480          |            |
| C2-C3 (Å)                         | 1.530          | 1.530      | 1.530          |            |
| C3-N4 (Å)                         | 1.464          | 1.462      | 1.462          |            |
| N4-C5 (Å)                         | 1.435          | 1.435      | 1.435          |            |
| C5-C10 (Å)                        | 1.406          | 1.406      | 1.409          |            |
| C5-C6(Å)                          | 1.385          | 1.385      | 1.384          |            |
| C6-C7 (Å)                         | 1.442          | 1.442      | 1.445          |            |
| C7-C8 (Å)                         | 1.456          | 1.456      | 1.449          |            |
| C8-C9 (Å)                         | 1.411          | 1.410      | 1.402          |            |
| C9-C10 (Å)                        | 1.414          | 1.413      | 1.412          |            |
| C7-O11 (Å)                        | 1.246          | 1.245      | 1.248          |            |
| <b>α</b> (C6-C5-C10-C2)           | -172.5°        | -172.1°    | -172.2°        |            |
| <b>β</b> (C6-C5-C10-C1)           | -133.4°        | -132.8°    | -132.8°        |            |
| <b>γ</b> (C6-C5-C10-C9)           | -3.2°          | -3.4°      | -3.2°          |            |
| <b>δ</b> (C8-C9-C10-C5)           | 2.8°           | 2.8°       | 2.7°           |            |

**Table SI-4:** Natural hybrid orbitals for the structure **3** with adenine and guanine.

| Transition state | Bond              | Center | % Natural hybrid p character                  |
|------------------|-------------------|--------|-----------------------------------------------|
| Adenine          | C1C2( $\sigma$ )  | C1     | 65.7 (sp <sup>1.92</sup> )                    |
|                  | C1C2( $\sigma$ )  | C2     | 75.4 (sp <sup>3.07</sup> )                    |
|                  | C2C10( $\sigma$ ) | C10    | 69.3 (sp <sup>2.26</sup> )                    |
|                  | C2C10( $\sigma$ ) | C2     | 75.8 (sp <sup>3.14</sup> )                    |
|                  | C1C10( $\sigma$ ) | C1     | 97.8 (sp <sup>44.43</sup> d <sup>0.02</sup> ) |
|                  | C1C10( $\sigma$ ) | C10    | 99.5 (sp <sup>99.99</sup> d <sup>0.02</sup> ) |
|                  | LP (N3-Adenine)   |        | 99.5 (sp <sup>99.99</sup> d <sup>0.22</sup> ) |
| Guanine          | C1C2( $\sigma$ )  | C1     | 67.1 (sp <sup>2.05</sup> )                    |
|                  | C1C2( $\sigma$ )  | C2     | 75.8 (sp <sup>3.13</sup> )                    |
|                  | C2C10( $\sigma$ ) | C10    | 68.7 (sp <sup>2.19</sup> )                    |
|                  | C2C10( $\sigma$ ) | C2     | 75.2 (sp <sup>3.05</sup> )                    |
|                  | C1Nu( $\sigma$ )  | C1     | 90.4 (sp <sup>9.42</sup> )                    |
|                  | C1Nu( $\sigma$ )  | Nu     | 90.1 (sp <sup>9.16</sup> )                    |
|                  | LP (N3-Guanine)   |        | 79.7 (sp <sup>3.95</sup> )                    |

**Table SI-5:** Stabilization energies [E(2)] for the molecule **3** with adenine and guanine.

| Transition state | Donor–acceptor                                           | E(2)/kcalmol <sup>-1</sup> |
|------------------|----------------------------------------------------------|----------------------------|
| Adenine–CPI      | sp <sub>C1C2</sub> t $\rho$ $\sigma^*$ <sub>C1C10</sub>  | 10.8                       |
| Adenine–CPI      | sp <sub>C1C2</sub> t $\rho$ $\sigma^*$ <sub>C2C10</sub>  | 1.6                        |
| Adenine–CPI      | sp <sub>C1C10</sub> t $\rho$ $\sigma^*$ <sub>C1C2</sub>  | 3.0                        |
| Adenine–CPI      | sp <sub>C1C10</sub> t $\rho$ $\sigma^*$ <sub>C1C10</sub> | 24.0                       |
| Adenine–CPI      | sp <sub>C1C10</sub> t $\rho$ $\sigma^*$ <sub>C2C10</sub> | 4.3                        |
| Adenine–CPI      | sp <sub>C2C10</sub> t $\rho$ $\sigma^*$ <sub>C1C2</sub>  | 1.8                        |
| Adenine–CPI      | sp <sub>C2C10</sub> t $\rho$ $\sigma^*$ <sub>C1C10</sub> | 3.4                        |
| Adenine–CPI      | LP <sub>Nu</sub> t $\rho$ $\sigma^*$ <sub>C1C10</sub>    | 98.1                       |
| Guanine–CPI      | sp <sub>C2C10</sub> t $\rho$ $\sigma^*$ <sub>C1C2</sub>  | 1.3                        |
| Guanine–CPI      | sp <sub>C2C10</sub> t $\rho$ $\sigma^*$ <sub>C1Nu</sub>  | 7.9                        |
| Guanine–CPI      | sp <sub>C1C2</sub> t $\rho$ $\sigma^*$ <sub>C2C10</sub>  | 2.1                        |
| Guanine–CPI      | sp <sub>C1Nu</sub> t $\rho$ $\sigma^*$ <sub>C2C10</sub>  | 0.9                        |
| Guanine–CPI      | sp <sub>C1Nu</sub> t $\rho$ $\sigma^*$ <sub>C1Nu</sub>   | 2.1                        |
| Guanine–CPI      | LP <sub>Nu</sub> t $\rho$ $\sigma^*$ <sub>C1Nu</sub>     | 25.0                       |

**Table SI-6:** Natural hybrid orbitals and electron population for the structures of the adenine and guanine.

| Structure | Bond             | Center | Electron population | % Natural hybrid p character                 |
|-----------|------------------|--------|---------------------|----------------------------------------------|
| Adenine   | N1C2( $\sigma$ ) | N1     | 1.98696             | 63.8 (sp <sup>1.77</sup> )                   |
|           | N1C2( $\sigma$ ) | C2     | 1.98696             | 65.6 (sp <sup>1.91</sup> )                   |
|           | C2N3( $\sigma$ ) | C2     | 1.98166             | 65.4 (sp <sup>1.89</sup> )                   |
|           | C2N3( $\sigma$ ) | N3     | 1.98166             | 65.0 (sp <sup>1.87</sup> )                   |
|           | C2N3( $\pi$ )    | C2     | 1.78118             | 99.9 (sp <sup>1.00</sup> )                   |
|           | C2N3( $\pi$ )    | N3     | 1.78118             | 99.7 (sp <sup>1.00</sup> )                   |
|           | N1C6( $\sigma$ ) | N1     | 1.97955             | 65.4 (sp <sup>1.90</sup> )                   |
|           | N1C6( $\sigma$ ) | C6     | 1.97955             | 67.9 (sp <sup>2.12</sup> )                   |
|           | N1C6( $\pi$ )    | N1     | 1.70579             | 99.8 (sp <sup>1.00</sup> )                   |
|           | N1C6( $\pi$ )    | C6     | 1.70579             | 99.9 (sp <sup>1.00</sup> )                   |
|           | LP               | N3     | 1.90275             | 68.1 (sp <sup>2.15</sup> d <sup>0.01</sup> ) |
| Guanine   | N1C2( $\sigma$ ) | N1     | 1.98810             | 62.6 (sp <sup>1.68</sup> )                   |
|           | N1C2( $\sigma$ ) | C2     | 1.98810             | 67.4 (sp <sup>2.07</sup> )                   |
|           | C2N3( $\sigma$ ) | C2     | 1.97774             | 63.8 (sp <sup>1.76</sup> )                   |
|           | C2N3( $\sigma$ ) | N3     | 1.97774             | 64.6 (sp <sup>1.83</sup> )                   |
|           | C2N3( $\pi$ )    | C2     | 1.83253             | 99.9 (sp <sup>1.00</sup> )                   |
|           | C2N3( $\pi$ )    | N3     | 1.83253             | 99.7 (sp <sup>1.00</sup> )                   |
|           | N1C6( $\sigma$ ) | N1     | 1.98379             | 64.4 (sp <sup>1.81</sup> )                   |
|           | N1C6( $\sigma$ ) | C6     | 1.98379             | 73.3 (sp <sup>2.76</sup> )                   |
|           | LP               | N3     | 1.88500             | 68.8 (sp <sup>2.21</sup> d <sup>0.01</sup> ) |



## Z-matrix

Vacuum PBE0/6-31G(d)

### Structure: ch3oh

```
c
o  1  oc2
h  2  ho3          1  hoc3
h  1  hc4          2  hco4          3  dih4
h  1  hc5          2  hco5          3  dih5
h  1  hc6          2  hco6          3  dih6
```

```
oc2      1.407928
ho3      0.964799
hoc3     107.660
hc4      1.101004
hco4     112.821
dih4     -61.586
hc5      1.093190
hco5     106.844
dih5     180.000
hc6      1.101004
hco6     112.821
dih6     61.586
```

Number of imaginary frequency: 0

### Thermochemical Data

```
Electronic Energy=                -115.579175189
(Hartree/Particle)
Zero-point correction=            0.051972 (Hartree/Particle)
Thermal correction to Energy=     0.055255
Thermal correction to Enthalpy=   0.056199
Thermal correction to Gibbs Free Energy= 0.029268
Sum of electronic and zero-point Energies= -115.527203
Sum of electronic and thermal Energies= -115.523920
Sum of electronic and thermal Enthalpies= -115.522976
Sum of electronic and thermal Free Energies= -115.549907
```

### Structure: CH3NH2

```
c
n  1  nc2
h  2  hn3          1  hnc3
h  2  hn4          3  hnh4          1  dih4
h  1  hc5          2  hcn5          3  dih5
h  1  hc6          2  hcn6          3  dih6
h  1  hc7          2  hcn7          3  dih7
```

```
nc2      1.454834
hn3      1.015848
hnc3     109.800
hn4      1.015848
hnh4     106.001
dih4     -118.540
hc5      1.095248
hcn5     109.199
dih5     -179.758
hc6      1.104202
hcn6     115.869
dih6     -58.084
```

hc7 1.095248  
hcn7 109.199  
dih7 63.590

Number of immaginary frequency: 0

Zero-point correction= 0.065036 (Hartree/Particle)  
Thermal correction to Energy= 0.068406  
Thermal correction to Enthalpy= 0.069350  
Thermal correction to Gibbs Free Energy= 0.042161  
Sum of electronic and zero-point Energies= -95.667297  
Sum of electronic and thermal Energies= -95.663927  
Sum of electronic and thermal Enthalpies= -95.662983  
Sum of electronic and thermal Free Energies= -95.690172

**Structure: Pyridine**

c  
c 1 cc2  
n 2 nc3 1 ncc3  
c 3 cn4 2 cnc4 1 dih4  
c 4 cc5 3 ccn5 2 dih5  
c 5 cc6 4 ccc6 3 dih6  
h 4 hc7 3 hcn7 2 dih7  
h 5 hc8 4 hcc8 3 dih8  
h 6 hc9 5 hcc9 4 dih9  
h 1 hc10 2 hcc10 3 dih10  
h 2 hc11 3 hcn11 4 dih11

cc2 1.392473  
nc3 1.333980  
ncc3 123.868  
cn4 1.333980  
cnc4 117.026  
dih4 0.000  
cc5 1.392514  
ccn5 123.866  
dih5 0.000  
cc6 1.390838  
ccc6 118.363  
dih6 0.000  
hc7 1.089292  
hcn7 115.869  
dih7 180.000  
hc8 1.086012  
hcc8 120.329  
dih8 180.000  
hc9 1.086855  
hcc9 120.743  
dih9 180.000  
hc10 1.086012  
hcc10 120.329  
dih10 180.000  
hc11 1.089293  
hcn11 115.869  
dih11 180.000

Number of immaginary frequency: 0

Zero-point correction= 0.089766 (Hartree/Particle)  
Thermal correction to Energy= 0.094027  
Thermal correction to Enthalpy= 0.094971  
Thermal correction to Gibbs Free Energy= 0.062373  
Sum of electronic and zero-point Energies= -247.899041  
Sum of electronic and thermal Energies= -247.894780

Sum of electronic and thermal Enthalpies= -247.893836  
 Sum of electronic and thermal Free Energies= -247.926434

**Structure: Adenine**

|   |    |     |   |     |   |     |
|---|----|-----|---|-----|---|-----|
| N |    |     |   |     |   |     |
| C | 1  | B1  |   |     |   |     |
| C | 2  | B2  | 1 | A1  |   |     |
| N | 3  | B3  | 2 | A2  | 1 | D1  |
| C | 1  | B4  | 2 | A3  | 3 | D2  |
| N | 3  | B5  | 2 | A4  | 1 | D3  |
| C | 6  | B6  | 3 | A5  | 2 | D4  |
| N | 7  | B7  | 6 | A6  | 3 | D5  |
| C | 8  | B8  | 7 | A7  | 6 | D6  |
| N | 9  | B9  | 8 | A8  | 7 | D7  |
| H | 4  | B10 | 3 | A9  | 2 | D8  |
| H | 5  | B11 | 1 | A10 | 2 | D9  |
| H | 7  | B12 | 6 | A11 | 3 | D10 |
| H | 10 | B13 | 9 | A12 | 8 | D11 |
| H | 10 | B14 | 9 | A13 | 8 | D12 |

|     |               |
|-----|---------------|
| B1  | 1.37817762    |
| B2  | 1.39519040    |
| B3  | 1.37124359    |
| B4  | 1.30640042    |
| B5  | 1.33439582    |
| B6  | 1.33097428    |
| B7  | 1.33828201    |
| B8  | 1.33920270    |
| B9  | 1.34936427    |
| B10 | 1.00843686    |
| B11 | 1.08260067    |
| B12 | 1.08853293    |
| B13 | 1.00743928    |
| B14 | 1.00699913    |
| A1  | 111.63798993  |
| A2  | 104.26100765  |
| A3  | 103.72630692  |
| A4  | 127.11498899  |
| A5  | 110.89500972  |
| A6  | 129.15298546  |
| A7  | 118.29900337  |
| A8  | 118.92664785  |
| A9  | 125.73504121  |
| A10 | 125.04246482  |
| A11 | 115.77100477  |
| A12 | 118.07003278  |
| A13 | 119.30798175  |
| D1  | -0.14102456   |
| D2  | 0.10729452    |
| D3  | 179.65398708  |
| D4  | -0.18104602   |
| D5  | 0.06500805    |
| D6  | 0.25903285    |
| D7  | 178.49020875  |
| D8  | -179.93794322 |
| D9  | 180.00000000  |
| D10 | -179.78700978 |
| D11 | 10.40088859   |
| D12 | 169.87397993  |

Number of imaginary frequency:0

Zero-point correction= 0.113803 (Hartree/Particle)

|                                              |             |
|----------------------------------------------|-------------|
| Thermal correction to Energy=                | 0.121023    |
| Thermal correction to Enthalpy=              | 0.121967    |
| Thermal correction to Gibbs Free Energy=     | 0.082107    |
| Sum of electronic and zero-point Energies=   | -466.688843 |
| Sum of electronic and thermal Energies=      | -466.681623 |
| Sum of electronic and thermal Enthalpies=    | -466.680679 |
| Sum of electronic and thermal Free Energies= | -466.720538 |

**Structure: Guanine**

|   |    |     |   |     |   |     |
|---|----|-----|---|-----|---|-----|
| C |    |     |   |     |   |     |
| C | 1  | B1  |   |     |   |     |
| C | 2  | B2  | 1 | A1  |   |     |
| N | 3  | B3  | 2 | A2  | 1 | D1  |
| C | 4  | B4  | 3 | A3  | 2 | D2  |
| N | 5  | B5  | 4 | A4  | 3 | D3  |
| N | 3  | B6  | 2 | A5  | 1 | D4  |
| C | 7  | B7  | 3 | A6  | 2 | D5  |
| N | 8  | B8  | 7 | A7  | 3 | D6  |
| N | 5  | B9  | 4 | A8  | 3 | D7  |
| O | 1  | B10 | 6 | A9  | 5 | D8  |
| H | 7  | B11 | 3 | A10 | 2 | D9  |
| H | 8  | B12 | 7 | A11 | 3 | D10 |
| H | 10 | B13 | 5 | A12 | 4 | D11 |
| H | 10 | B14 | 5 | A13 | 4 | D12 |
| H | 6  | B15 | 5 | A14 | 4 | D13 |

|     |               |
|-----|---------------|
| B1  | 1.43754320    |
| B2  | 1.39154503    |
| B3  | 1.35341724    |
| B4  | 1.30762418    |
| B5  | 1.36503148    |
| B6  | 1.36357845    |
| B7  | 1.37616890    |
| B8  | 1.30356794    |
| B9  | 1.37131512    |
| B10 | 1.21384080    |
| B11 | 1.00853652    |
| B12 | 1.08220409    |
| B13 | 1.01000519    |
| B14 | 1.01047933    |
| B15 | 1.01246461    |
| A1  | 118.55197804  |
| A2  | 129.46398228  |
| A3  | 112.17606455  |
| A4  | 123.69595323  |
| A5  | 104.74098040  |
| A6  | 106.81198004  |
| A7  | 112.96203613  |
| A8  | 119.47703511  |
| A9  | 119.26379024  |
| A10 | 125.46598734  |
| A11 | 121.54994010  |
| A12 | 117.36199801  |
| A13 | 112.58702458  |
| A14 | 119.88499061  |
| D1  | 1.31192562    |
| D2  | -1.49494963   |
| D3  | 0.84498055    |
| D4  | -179.44602043 |
| D5  | 0.08498186    |
| D6  | -0.05500294   |
| D7  | -176.57104949 |
| D8  | -179.68326505 |

D9 179.88094371  
 D10 179.96797444  
 D11 -147.27100628  
 D12 -12.26098716  
 D13 -175.34901400

Number of imaginary frequency:0

Zero-point correction= 0.118818 (Hartree/Particle)  
 Thermal correction to Energy= 0.126930  
 Thermal correction to Enthalpy= 0.127875  
 Thermal correction to Gibbs Free Energy= 0.085911  
 Sum of electronic and zero-point Energies= -541.843682  
 Sum of electronic and thermal Energies= -541.835569  
 Sum of electronic and thermal Enthalpies= -541.834625  
 Sum of electronic and thermal Free Energies= -541.876589

**Structure: NBocCPI (4)**

|   |    |     |    |     |    |     |
|---|----|-----|----|-----|----|-----|
| C |    |     |    |     |    |     |
| C | 1  | B1  |    |     |    |     |
| C | 2  | B2  | 1  | A1  |    |     |
| C | 3  | B3  | 2  | A2  | 1  | D1  |
| C | 4  | B4  | 3  | A3  | 2  | D2  |
| C | 1  | B5  | 2  | A4  | 3  | D3  |
| C | 4  | B6  | 3  | A5  | 2  | D4  |
| C | 7  | B7  | 4  | A6  | 3  | D5  |
| N | 8  | B8  | 7  | A7  | 4  | D6  |
| C | 5  | B9  | 4  | A8  | 3  | D7  |
| C | 10 | B10 | 5  | A9  | 4  | D8  |
| N | 6  | B11 | 1  | A10 | 2  | D9  |
| C | 10 | B12 | 5  | A11 | 4  | D10 |
| H | 8  | B13 | 7  | A12 | 4  | D11 |
| O | 2  | B14 | 1  | A13 | 6  | D12 |
| C | 12 | B15 | 6  | A14 | 1  | D13 |
| O | 16 | B16 | 12 | A15 | 6  | D14 |
| C | 17 | B17 | 16 | A16 | 12 | D15 |
| C | 18 | B18 | 17 | A17 | 16 | D16 |
| O | 16 | B19 | 12 | A18 | 6  | D17 |
| C | 18 | B20 | 17 | A19 | 16 | D18 |
| C | 18 | B21 | 17 | A20 | 16 | D19 |
| H | 7  | B22 | 4  | A21 | 3  | D20 |
| H | 9  | B23 | 8  | A22 | 7  | D21 |
| H | 1  | B24 | 6  | A23 | 12 | D22 |
| H | 10 | B25 | 5  | A24 | 4  | D23 |
| H | 13 | B26 | 10 | A25 | 5  | D24 |
| H | 13 | B27 | 10 | A26 | 5  | D25 |
| H | 11 | B28 | 10 | A27 | 5  | D26 |
| H | 11 | B29 | 10 | A28 | 5  | D27 |
| H | 22 | B30 | 18 | A29 | 17 | D28 |
| H | 22 | B31 | 18 | A30 | 17 | D29 |
| H | 22 | B32 | 18 | A31 | 17 | D30 |
| H | 21 | B33 | 18 | A32 | 17 | D31 |
| H | 21 | B34 | 18 | A33 | 17 | D32 |
| H | 21 | B35 | 18 | A34 | 17 | D33 |
| H | 19 | B36 | 18 | A35 | 17 | D34 |
| H | 19 | B37 | 18 | A36 | 17 | D35 |
| H | 19 | B38 | 18 | A37 | 17 | D36 |

B1 1.46747776  
 B2 1.45582377  
 B3 1.38318936  
 B4 1.46423872  
 B5 1.35342461

|     |              |
|-----|--------------|
| B6  | 1.41539757   |
| B7  | 1.38413601   |
| B8  | 1.35968473   |
| B9  | 1.51841618   |
| B10 | 1.51160330   |
| B11 | 1.39903263   |
| B12 | 1.48493635   |
| B13 | 1.08085651   |
| B14 | 1.23029315   |
| B15 | 1.38031181   |
| B16 | 1.34233409   |
| B17 | 1.46193491   |
| B18 | 1.52383918   |
| B19 | 1.21205641   |
| B20 | 1.52270432   |
| B21 | 1.52382925   |
| B22 | 1.08223977   |
| B23 | 1.00887666   |
| B24 | 1.08171232   |
| B25 | 1.08531409   |
| B26 | 1.08777987   |
| B27 | 1.08567860   |
| B28 | 1.09708793   |
| B29 | 1.09295146   |
| B30 | 1.09522014   |
| B31 | 1.09531995   |
| B32 | 1.09128257   |
| B33 | 1.09443635   |
| B34 | 1.09479906   |
| B35 | 1.09470720   |
| B36 | 1.09527774   |
| B37 | 1.09122397   |
| B38 | 1.09534018   |
| A1  | 114.35514876 |
| A2  | 126.54613681 |
| A3  | 117.50192434 |
| A4  | 120.50364785 |
| A5  | 107.25490518 |
| A6  | 106.61142203 |
| A7  | 108.61401342 |
| A8  | 129.94607381 |
| A9  | 106.84840703 |
| A10 | 128.77239696 |
| A11 | 61.15298585  |
| A12 | 130.05006328 |
| A13 | 123.76322569 |
| A14 | 124.57425120 |
| A15 | 109.17697723 |
| A16 | 120.40001897 |
| A17 | 110.11855008 |
| A18 | 124.35175457 |
| A19 | 102.53489025 |
| A20 | 110.00823735 |
| A21 | 127.91975576 |
| A22 | 127.90722399 |
| A23 | 121.69516854 |
| A24 | 120.80734956 |
| A25 | 118.96718066 |
| A26 | 118.18523777 |
| A27 | 111.63187710 |
| A28 | 112.85056795 |
| A29 | 109.39818608 |
| A30 | 110.29724558 |
| A31 | 111.15667261 |

|     |               |
|-----|---------------|
| A32 | 109.95858336  |
| A33 | 110.69082625  |
| A34 | 110.68693139  |
| A35 | 109.38576159  |
| A36 | 111.22313781  |
| A37 | 110.27819422  |
| D1  | 4.39602127    |
| D2  | 4.32468501    |
| D3  | -3.62008223   |
| D4  | 179.96395744  |
| D5  | 0.51235072    |
| D6  | -0.48865321   |
| D7  | -157.08275883 |
| D8  | 145.70157033  |
| D9  | 170.70320553  |
| D10 | -104.98888369 |
| D11 | 178.89884546  |
| D12 | 179.85239130  |
| D13 | 11.36134401   |
| D14 | -173.10054276 |
| D15 | -179.86771034 |
| D16 | 62.09750634   |
| D17 | 7.07220554    |
| D18 | 179.92211592  |
| D19 | -62.26399168  |
| D20 | 179.97980285  |
| D21 | 179.68341480  |
| D22 | -4.66203641   |
| D23 | 5.55617678    |
| D24 | -107.85879402 |
| D25 | 103.67385987  |
| D26 | -107.29241067 |
| D27 | 130.56858730  |
| D28 | -173.39239877 |
| D29 | -54.64948015  |
| D30 | 66.42610311   |
| D31 | 179.76301165  |
| D32 | -60.42573619  |
| D33 | 59.91689023   |
| D34 | 172.82320792  |
| D35 | -66.98664987  |
| D36 | 54.11296764   |

Number of imaginary frequency = 0

|                                              |                             |
|----------------------------------------------|-----------------------------|
| Zero-point correction=                       | 0.323255 (Hartree/Particle) |
| Thermal correction to Energy=                | 0.341789                    |
| Thermal correction to Enthalpy=              | 0.342733                    |
| Thermal correction to Gibbs Free Energy=     | 0.276888                    |
| Sum of electronic and zero-point Energies=   | -954.325001                 |
| Sum of electronic and thermal Energies=      | -954.306468                 |
| Sum of electronic and thermal Enthalpies=    | -954.305524                 |
| Sum of electronic and thermal Free Energies= | -954.371368                 |

**Structure: CPI (3)**

|   |   |    |   |    |    |
|---|---|----|---|----|----|
| N |   |    |   |    |    |
| C | 1 | B1 |   |    |    |
| C | 2 | B2 | 1 | A1 |    |
| C | 3 | B3 | 2 | A2 | 1  |
| C | 1 | B4 | 2 | A3 | 3  |
| C | 3 | B5 | 2 | A4 | 1  |
| C | 6 | B6 | 3 | A5 | 2  |
| C | 7 | B7 | 6 | A6 | 3  |
|   |   |    |   |    | D1 |
|   |   |    |   |    | D2 |
|   |   |    |   |    | D3 |
|   |   |    |   |    | D4 |
|   |   |    |   |    | D5 |

|   |    |     |    |     |    |     |
|---|----|-----|----|-----|----|-----|
| C | 2  | B8  | 1  | A7  | 5  | D6  |
| C | 6  | B9  | 3  | A8  | 2  | D7  |
| C | 10 | B10 | 6  | A9  | 3  | D8  |
| N | 7  | B11 | 6  | A10 | 3  | D9  |
| C | 10 | B12 | 6  | A11 | 3  | D10 |
| O | 9  | B13 | 2  | A12 | 1  | D11 |
| C | 12 | B14 | 7  | A13 | 6  | D12 |
| O | 15 | B15 | 12 | A14 | 7  | D13 |
| C | 15 | B16 | 12 | A15 | 7  | D14 |
| C | 17 | B17 | 15 | A16 | 12 | D15 |
| C | 18 | B18 | 17 | A17 | 15 | D16 |
| C | 19 | B19 | 18 | A18 | 17 | D17 |
| N | 20 | B20 | 19 | A19 | 18 | D18 |
| C | 20 | B21 | 19 | A20 | 18 | D19 |
| C | 22 | B22 | 20 | A21 | 19 | D20 |
| C | 23 | B23 | 22 | A22 | 20 | D21 |
| C | 24 | B24 | 23 | A23 | 22 | D22 |
| H | 25 | B25 | 24 | A24 | 23 | D23 |
| H | 18 | B26 | 17 | A25 | 15 | D24 |
| H | 8  | B27 | 7  | A26 | 6  | D25 |
| H | 11 | B28 | 10 | A27 | 6  | D26 |
| H | 11 | B29 | 10 | A28 | 6  | D27 |
| H | 10 | B30 | 6  | A29 | 3  | D28 |
| H | 13 | B31 | 10 | A30 | 6  | D29 |
| H | 13 | B32 | 10 | A31 | 6  | D30 |
| H | 4  | B33 | 3  | A32 | 2  | D31 |
| H | 21 | B34 | 20 | A33 | 19 | D32 |
| H | 1  | B35 | 5  | A34 | 4  | D33 |
| H | 24 | B36 | 23 | A35 | 22 | D34 |
| H | 23 | B37 | 22 | A36 | 20 | D35 |
| H | 22 | B38 | 20 | A37 | 19 | D36 |
| H | 5  | B39 | 1  | A38 | 2  | D37 |

|     |            |
|-----|------------|
| B1  | 1.36281853 |
| B2  | 1.38324486 |
| B3  | 1.41514809 |
| B4  | 1.35957550 |
| B5  | 1.46399016 |
| B6  | 1.48455125 |
| B7  | 1.35290865 |
| B8  | 1.45443136 |
| B9  | 1.51546530 |
| B10 | 1.51081245 |
| B11 | 1.40584114 |
| B12 | 1.48475414 |
| B13 | 1.22970719 |
| B14 | 1.37772708 |
| B15 | 1.22706280 |
| B16 | 1.47827136 |
| B17 | 1.38352250 |
| B18 | 1.42429995 |
| B19 | 1.42069661 |
| B20 | 1.36096963 |
| B21 | 1.39943013 |
| B22 | 1.38248167 |
| B23 | 1.41110465 |
| B24 | 1.38104528 |
| B25 | 1.08686334 |
| B26 | 1.07875135 |
| B27 | 1.08107630 |
| B28 | 1.09369622 |
| B29 | 1.09767959 |
| B30 | 1.08518318 |
| B31 | 1.08778608 |



|     |               |
|-----|---------------|
| B32 | 1.08556842    |
| B33 | 1.08220681    |
| B34 | 1.01010028    |
| B35 | 1.00888839    |
| B36 | 1.08630082    |
| B37 | 1.08650298    |
| B38 | 1.08627355    |
| B39 | 1.08088175    |
| A1  | 108.16176098  |
| A2  | 107.26232752  |
| A3  | 109.34110017  |
| A4  | 117.55733750  |
| A5  | 115.69123996  |
| A6  | 123.72786344  |
| A7  | 125.40846634  |
| A8  | 129.72936670  |
| A9  | 106.73251078  |
| A10 | 107.57351726  |
| A11 | 61.21903887   |
| A12 | 122.00613169  |
| A13 | 123.69753699  |
| A14 | 121.71441670  |
| A15 | 120.07617609  |
| A16 | 138.16380944  |
| A17 | 107.13704296  |
| A18 | 106.92374324  |
| A19 | 107.22042263  |
| A20 | 122.09484996  |
| A21 | 117.26273911  |
| A22 | 121.58980487  |
| A23 | 121.12053582  |
| A24 | 120.76438465  |
| A25 | 127.51104694  |
| A26 | 121.91700246  |
| A27 | 112.16590769  |
| A28 | 111.02945957  |
| A29 | 120.95287545  |
| A30 | 119.02214800  |
| A31 | 118.10185718  |
| A32 | 127.92969394  |
| A33 | 128.92030414  |
| A34 | 127.86195515  |
| A35 | 119.11214927  |
| A36 | 119.25355585  |
| A37 | 121.34976194  |
| A38 | 121.33834838  |
| D1  | -0.33814358   |
| D2  | 0.04300083    |
| D3  | -176.03368168 |
| D4  | -12.91166574  |
| D5  | 14.37836658   |
| D6  | 179.67634346  |
| D7  | -156.92933773 |
| D8  | 145.38937615  |
| D9  | -162.30196846 |
| D10 | -105.19146578 |
| D11 | 1.34878090    |
| D12 | -164.75709351 |
| D13 | 7.43116313    |
| D14 | -172.95874639 |
| D15 | 11.78546519   |
| D16 | 176.38930402  |
| D17 | -0.03911012   |
| D18 | 0.06583967    |

|     |               |
|-----|---------------|
| D19 | -179.98271839 |
| D20 | 0.07518328    |
| D21 | -0.08969347   |
| D22 | 0.04118457    |
| D23 | 179.98490795  |
| D24 | -1.76503449   |
| D25 | 178.14819702  |
| D26 | 130.55808161  |
| D27 | -107.31630848 |
| D28 | 5.51439558    |
| D29 | -107.85832557 |
| D30 | 103.69328898  |
| D31 | -179.99564911 |
| D32 | -175.78487923 |
| D33 | 179.69454421  |
| D34 | -179.95760716 |
| D35 | 179.88902970  |
| D36 | -179.99493641 |
| D37 | -179.17019002 |

Number of immaginary frequency = 0

|                                              |                             |
|----------------------------------------------|-----------------------------|
| Zero-point correction=                       | 0.316889 (Hartree/Particle) |
| Thermal correction to Energy=                | 0.335328                    |
| Thermal correction to Enthalpy=              | 0.336273                    |
| Thermal correction to Gibbs Free Energy=     | 0.269479                    |
| Sum of electronic and zero-point Energies=   | -1084.320810                |
| Sum of electronic and thermal Energies=      | -1084.302371                |
| Sum of electronic and thermal Enthalpies=    | -1084.301427                |
| Sum of electronic and thermal Free Energies= | -1084.368220                |

**Structure: DSI (2)**

|   |    |     |    |     |     |
|---|----|-----|----|-----|-----|
| C |    |     |    |     |     |
| C | 1  | B1  |    |     |     |
| C | 2  | B2  | 1  | A1  |     |
| N | 3  | B3  | 2  | A2  | 1   |
| C | 4  | B4  | 3  | A3  | 2   |
| C | 1  | B5  | 2  | A4  | 3   |
| C | 2  | B6  | 1  | A5  | 6   |
| C | 7  | B7  | 2  | A6  | 1   |
| C | 8  | B8  | 7  | A7  | 2   |
| C | 3  | B9  | 2  | A8  | 1   |
| C | 7  | B10 | 2  | A9  | 1   |
| C | 11 | B11 | 7  | A10 | 2   |
| N | 8  | B12 | 7  | A11 | 2   |
| C | 4  | B13 | 3  | A12 | 2   |
| O | 14 | B14 | 4  | A13 | 3   |
| O | 9  | B15 | 8  | A14 | 7   |
| C | 12 | B16 | 11 | A15 | 7   |
| O | 17 | B17 | 12 | A16 | 11  |
| C | 14 | B18 | 4  | A17 | 3   |
| N | 19 | B19 | 14 | A18 | 4   |
| C | 20 | B20 | 19 | A19 | 14  |
| C | 21 | B21 | 20 | A20 | 19  |
| C | 19 | B22 | 14 | A21 | 4   |
| C | 21 | B23 | 20 | A22 | 19  |
| C | 24 | B24 | 21 | A23 | 20  |
| C | 25 | B25 | 24 | A24 | 21  |
| C | 26 | B26 | 25 | A25 | 24  |
| O | 17 | B27 | 12 | A26 | 11  |
| C | 28 | B28 | 17 | A27 | 12  |
| H | 24 | B29 | 21 | A28 | 20  |
| H | 25 | B30 | 24 | A29 | 21  |
| H | 26 | B31 | 25 | A30 | 24  |
|   |    |     |    |     | D1  |
|   |    |     |    |     | D2  |
|   |    |     |    |     | D3  |
|   |    |     |    |     | D4  |
|   |    |     |    |     | D5  |
|   |    |     |    |     | D6  |
|   |    |     |    |     | D7  |
|   |    |     |    |     | D8  |
|   |    |     |    |     | D9  |
|   |    |     |    |     | D10 |
|   |    |     |    |     | D11 |
|   |    |     |    |     | D12 |
|   |    |     |    |     | D13 |
|   |    |     |    |     | D14 |
|   |    |     |    |     | D15 |
|   |    |     |    |     | D16 |
|   |    |     |    |     | D17 |
|   |    |     |    |     | D18 |
|   |    |     |    |     | D19 |
|   |    |     |    |     | D20 |
|   |    |     |    |     | D21 |
|   |    |     |    |     | D22 |
|   |    |     |    |     | D23 |
|   |    |     |    |     | D24 |
|   |    |     |    |     | D25 |
|   |    |     |    |     | D26 |
|   |    |     |    |     | D27 |
|   |    |     |    |     | D28 |
|   |    |     |    |     | D29 |

|   |    |     |    |     |    |     |
|---|----|-----|----|-----|----|-----|
| H | 27 | B32 | 26 | A31 | 25 | D30 |
| H | 23 | B33 | 19 | A32 | 14 | D31 |
| H | 10 | B34 | 3  | A33 | 2  | D32 |
| H | 5  | B35 | 4  | A34 | 3  | D33 |
| H | 5  | B36 | 4  | A35 | 3  | D34 |
| H | 6  | B37 | 1  | A36 | 2  | D35 |
| H | 1  | B38 | 6  | A37 | 5  | D36 |
| H | 1  | B39 | 6  | A38 | 5  | D37 |
| H | 11 | B40 | 7  | A39 | 2  | D38 |
| H | 29 | B41 | 28 | A40 | 17 | D39 |
| H | 29 | B42 | 28 | A41 | 17 | D40 |
| H | 29 | B43 | 28 | A42 | 17 | D41 |
| H | 20 | B44 | 19 | A43 | 14 | D42 |
| H | 13 | B45 | 8  | A44 | 7  | D43 |

|     |              |
|-----|--------------|
| B1  | 1.52781265   |
| B2  | 1.48403046   |
| B3  | 1.40369532   |
| B4  | 1.46861020   |
| B5  | 1.48458353   |
| B6  | 1.46405039   |
| B7  | 1.39048538   |
| B8  | 1.46197239   |
| B9  | 1.35400649   |
| B10 | 1.40721307   |
| B11 | 1.39162868   |
| B12 | 1.35256463   |
| B13 | 1.37989268   |
| B14 | 1.22646889   |
| B15 | 1.22728687   |
| B16 | 1.45963214   |
| B17 | 1.21431879   |
| B18 | 1.47706811   |
| B19 | 1.37642525   |
| B20 | 1.36100390   |
| B21 | 1.42066989   |
| B22 | 1.38361638   |
| B23 | 1.39956132   |
| B24 | 1.38242312   |
| B25 | 1.41117500   |
| B26 | 1.38082192   |
| B27 | 1.34158986   |
| B28 | 1.42523498   |
| B29 | 1.08623258   |
| B30 | 1.08646428   |
| B31 | 1.08624708   |
| B32 | 1.08684016   |
| B33 | 1.07872477   |
| B34 | 1.08115054   |
| B35 | 1.09365962   |
| B36 | 1.09754051   |
| B37 | 1.08524567   |
| B38 | 1.08777160   |
| B39 | 1.08563336   |
| B40 | 1.08148306   |
| B41 | 1.09008900   |
| B42 | 1.09325605   |
| B43 | 1.09329552   |
| B44 | 1.01002355   |
| B45 | 1.01103304   |
| A1  | 113.97702818 |
| A2  | 107.58602111 |
| A3  | 111.25893957 |
| A4  | 60.38121825  |

|     |               |
|-----|---------------|
| A5  | 120.48165647  |
| A6  | 117.71899797  |
| A7  | 125.96099983  |
| A8  | 123.80554221  |
| A9  | 134.80969200  |
| A10 | 106.45697535  |
| A11 | 108.39713847  |
| A12 | 123.70004850  |
| A13 | 121.60298478  |
| A14 | 121.71617447  |
| A15 | 132.54595340  |
| A16 | 123.60001034  |
| A17 | 120.01701587  |
| A18 | 113.41602040  |
| A19 | 110.24302511  |
| A20 | 107.22898150  |
| A21 | 138.04191321  |
| A22 | 130.70198213  |
| A23 | 117.25497448  |
| A24 | 121.61303248  |
| A25 | 121.11397739  |
| A26 | 112.14404240  |
| A27 | 114.58302807  |
| A28 | 121.36198611  |
| A29 | 119.23899509  |
| A30 | 119.10601987  |
| A31 | 120.77370934  |
| A32 | 127.54723272  |
| A33 | 121.82301666  |
| A34 | 109.92399665  |
| A35 | 110.23401227  |
| A36 | 120.86345527  |
| A37 | 119.13086662  |
| A38 | 118.05545313  |
| A39 | 128.61796397  |
| A40 | 105.64298951  |
| A41 | 110.64398193  |
| A42 | 110.64802540  |
| A43 | 120.78751526  |
| A44 | 125.57896863  |
| D1  | 51.90098025   |
| D2  | 18.64503551   |
| D3  | -95.26758264  |
| D4  | 120.50965036  |
| D5  | 130.51743417  |
| D6  | 4.30597491    |
| D7  | -131.29653545 |
| D8  | -43.93938489  |
| D9  | 175.37267051  |
| D10 | -176.23542287 |
| D11 | -164.67900579 |
| D12 | 7.82405612    |
| D13 | -178.93012989 |
| D14 | 179.15997812  |
| D15 | -179.75797087 |
| D16 | -172.60995055 |
| D17 | -171.56598862 |
| D18 | -177.22503704 |
| D19 | -0.02600118   |
| D20 | 12.32514849   |
| D21 | -179.98244036 |
| D22 | -179.92415341 |
| D23 | -0.08093837   |
| D24 | -0.00000000   |

|     |               |
|-----|---------------|
| D25 | 0.34608627    |
| D26 | 179.88100744  |
| D27 | -0.02403363   |
| D28 | 179.87601692  |
| D29 | -179.98025709 |
| D30 | -179.99238515 |
| D31 | -1.88508103   |
| D32 | 177.91173366  |
| D33 | -139.59098263 |
| D34 | 100.29607234  |
| D35 | -110.80288211 |
| D36 | -11.66124752  |
| D37 | -160.12222162 |
| D38 | -5.04197082   |
| D39 | -179.79703962 |
| D40 | -60.12909274  |
| D41 | 60.55095003   |
| D42 | -1.11166932   |
| D43 | -179.40972343 |

Number of imaginary frequency:0

Energy= -1312.2788961 (a.u.)

**Structure: DSA (1)**

|   |    |     |    |     |    |     |
|---|----|-----|----|-----|----|-----|
| C |    |     |    |     |    |     |
| C | 1  | B1  |    |     |    |     |
| C | 2  | B2  | 1  | A1  |    |     |
| C | 3  | B3  | 2  | A2  | 1  | D1  |
| C | 4  | B4  | 3  | A3  | 2  | D2  |
| C | 1  | B5  | 2  | A4  | 3  | D3  |
| N | 3  | B6  | 2  | A5  | 1  | D4  |
| C | 7  | B7  | 3  | A6  | 2  | D5  |
| C | 8  | B8  | 7  | A7  | 3  | D6  |
| C | 8  | B9  | 7  | A8  | 3  | D7  |
| O | 10 | B10 | 8  | A9  | 7  | D8  |
| O | 4  | B11 | 3  | A10 | 2  | D9  |
| C | 12 | B12 | 4  | A11 | 3  | D10 |
| O | 5  | B13 | 4  | A12 | 3  | D11 |
| C | 14 | B14 | 5  | A13 | 4  | D12 |
| O | 6  | B15 | 1  | A14 | 2  | D13 |
| C | 16 | B16 | 6  | A15 | 1  | D14 |
| N | 10 | B17 | 8  | A16 | 7  | D15 |
| C | 18 | B18 | 10 | A17 | 8  | D16 |
| C | 19 | B19 | 18 | A18 | 10 | D17 |
| C | 20 | B20 | 19 | A19 | 18 | D18 |
| C | 18 | B21 | 10 | A20 | 8  | D19 |
| C | 19 | B22 | 18 | A21 | 10 | D20 |
| C | 23 | B23 | 19 | A22 | 18 | D21 |
| C | 24 | B24 | 23 | A23 | 19 | D22 |
| C | 25 | B25 | 24 | A24 | 23 | D23 |
| C | 26 | B26 | 25 | A25 | 24 | D24 |
| C | 27 | B27 | 26 | A26 | 25 | D25 |
| N | 25 | B28 | 24 | A27 | 23 | D26 |
| C | 21 | B29 | 20 | A28 | 19 | D27 |
| C | 28 | B30 | 27 | A29 | 26 | D28 |
| O | 31 | B31 | 28 | A30 | 27 | D29 |
| C | 32 | B32 | 31 | A31 | 28 | D30 |
| O | 24 | B33 | 23 | A32 | 19 | D31 |
| O | 31 | B34 | 28 | A33 | 27 | D32 |
| H | 1  | B35 | 6  | A34 | 16 | D33 |
| H | 9  | B36 | 8  | A35 | 7  | D34 |
| H | 23 | B37 | 19 | A36 | 18 | D35 |

|   |    |     |    |     |    |     |
|---|----|-----|----|-----|----|-----|
| H | 22 | B38 | 18 | A37 | 10 | D36 |
| H | 22 | B39 | 18 | A38 | 10 | D37 |
| H | 21 | B40 | 20 | A39 | 19 | D38 |
| H | 30 | B41 | 21 | A40 | 20 | D39 |
| H | 30 | B42 | 21 | A41 | 20 | D40 |
| H | 13 | B43 | 12 | A42 | 4  | D41 |
| H | 13 | B44 | 12 | A43 | 4  | D42 |
| H | 13 | B45 | 12 | A44 | 4  | D43 |
| H | 15 | B46 | 14 | A45 | 5  | D44 |
| H | 15 | B47 | 14 | A46 | 5  | D45 |
| H | 15 | B48 | 14 | A47 | 5  | D46 |
| H | 27 | B49 | 26 | A48 | 25 | D47 |
| H | 17 | B50 | 16 | A49 | 6  | D48 |
| H | 17 | B51 | 16 | A50 | 6  | D49 |
| H | 17 | B52 | 16 | A51 | 6  | D50 |
| H | 33 | B53 | 32 | A52 | 31 | D51 |
| H | 33 | B54 | 32 | A53 | 31 | D52 |
| H | 33 | B55 | 32 | A54 | 31 | D53 |
| H | 7  | B56 | 3  | A55 | 2  | D54 |
| H | 29 | B57 | 25 | A56 | 24 | D55 |

|     |            |
|-----|------------|
| B1  | 1.41131726 |
| B2  | 1.41204768 |
| B3  | 1.40362417 |
| B4  | 1.38524308 |
| B5  | 1.38142193 |
| B6  | 1.35782916 |
| B7  | 1.37376835 |
| B8  | 1.38838451 |
| B9  | 1.47492791 |
| B10 | 1.22613823 |
| B11 | 1.36238924 |
| B12 | 1.42440979 |
| B13 | 1.36601930 |
| B14 | 1.42075840 |
| B15 | 1.35839820 |
| B16 | 1.40659968 |
| B17 | 1.38224985 |
| B18 | 1.40264846 |
| B19 | 1.48441257 |
| B20 | 1.51511982 |
| B21 | 1.46797305 |
| B22 | 1.35439751 |
| B23 | 1.46636772 |
| B24 | 1.46230111 |
| B25 | 1.39037426 |
| B26 | 1.40726601 |
| B27 | 1.39169706 |
| B28 | 1.35240101 |
| B29 | 1.48479003 |
| B30 | 1.45924091 |
| B31 | 1.34193905 |
| B32 | 1.42509273 |
| B33 | 1.22749772 |
| B34 | 1.21440870 |
| B35 | 1.08401809 |
| B36 | 1.07891966 |
| B37 | 1.08108378 |
| B38 | 1.09363188 |
| B39 | 1.09769758 |
| B40 | 1.08525684 |
| B41 | 1.08776245 |
| B42 | 1.08563552 |
| B43 | 1.09275889 |

|     |              |
|-----|--------------|
| B44 | 1.09716182   |
| B45 | 1.09198768   |
| B46 | 1.09693046   |
| B47 | 1.09531105   |
| B48 | 1.09231259   |
| B49 | 1.08147914   |
| B50 | 1.09135150   |
| B51 | 1.09864756   |
| B52 | 1.09820957   |
| B53 | 1.09011430   |
| B54 | 1.09328706   |
| B55 | 1.09328335   |
| B56 | 1.00941365   |
| B57 | 1.01099778   |
| A1  | 119.70301918 |
| A2  | 122.31797755 |
| A3  | 117.37902490 |
| A4  | 118.29006057 |
| A5  | 108.25801893 |
| A6  | 109.74797486 |
| A7  | 108.29199715 |
| A8  | 113.63397080 |
| A9  | 118.61999320 |
| A10 | 118.36598515 |
| A11 | 115.58298603 |
| A12 | 119.60700003 |
| A13 | 113.79900633 |
| A14 | 124.93199709 |
| A15 | 117.19499048 |
| A16 | 119.94198934 |
| A17 | 123.67895382 |
| A18 | 107.58696345 |
| A19 | 106.51399645 |
| A20 | 124.98308882 |
| A21 | 128.56112760 |
| A22 | 120.78398726 |
| A23 | 114.43499835 |
| A24 | 125.98600243 |
| A25 | 107.28898550 |
| A26 | 106.46400659 |
| A27 | 125.60217885 |
| A28 | 61.23041268  |
| A29 | 132.55867938 |
| A30 | 112.16101517 |
| A31 | 114.55799865 |
| A32 | 123.84102394 |
| A33 | 123.62696276 |
| A34 | 121.45091845 |
| A35 | 127.33899348 |
| A36 | 121.77803319 |
| A37 | 109.92031417 |
| A38 | 110.28129784 |
| A39 | 120.93103093 |
| A40 | 119.09720516 |
| A41 | 118.07978901 |
| A42 | 111.19394018 |
| A43 | 110.64102725 |
| A44 | 105.89895404 |
| A45 | 110.80198942 |
| A46 | 110.99997153 |
| A47 | 106.29100359 |
| A48 | 128.62595114 |
| A49 | 106.10301589 |
| A50 | 111.61501006 |

|     |               |
|-----|---------------|
| A51 | 111.42700785  |
| A52 | 105.64602744  |
| A53 | 110.65101213  |
| A54 | 110.65203451  |
| A55 | 127.79577038  |
| A56 | 125.54503568  |
| D1  | -0.80795551   |
| D2  | 0.08197015    |
| D3  | 0.65531281    |
| D4  | 179.68696507  |
| D5  | 0.17607376    |
| D6  | -0.27706296   |
| D7  | -177.67212984 |
| D8  | 8.42560832    |
| D9  | -177.50201827 |
| D10 | -120.05999135 |
| D11 | 178.94800767  |
| D12 | 101.46798100  |
| D13 | 179.68668830  |
| D14 | 1.24177682    |
| D15 | -170.96833903 |
| D16 | -172.79199177 |
| D17 | -164.34803005 |
| D18 | -10.21799317  |
| D19 | 3.76247128    |
| D20 | 18.96490112   |
| D21 | 169.92841799  |
| D22 | -3.42997774   |
| D23 | 4.40699496    |
| D24 | -179.65996594 |
| D25 | 0.48897872    |
| D26 | -174.81442258 |
| D27 | 108.23485452  |
| D28 | 179.09227942  |
| D29 | 0.37461027    |
| D30 | 179.93999123  |
| D31 | -179.94793428 |
| D32 | -179.69549919 |
| D33 | -0.29943277   |
| D34 | -177.87369120 |
| D35 | -5.97455514   |
| D36 | 43.24431117   |
| D37 | -76.83421205  |
| D38 | -141.12721186 |
| D39 | -107.73200182 |
| D40 | 103.77149451  |
| D41 | -63.45804554  |
| D42 | 58.61198642   |
| D43 | 176.97302607  |
| D44 | -59.83101030  |
| D45 | 62.46600416   |
| D46 | -178.68603664 |
| D47 | -179.93795992 |
| D48 | 179.27300154  |
| D49 | -61.73598384  |
| D50 | 60.41504172   |
| D51 | -179.96907003 |
| D52 | -60.30205939  |
| D53 | 60.36693233   |
| D54 | -177.84151236 |
| D55 | -0.03792072   |

Number of imaginary frequency:0



Energy= -1655.45841659(a.u.)

**Structure: N-Boc-CPI (4) in water**

|   |    |     |    |     |    |  |     |
|---|----|-----|----|-----|----|--|-----|
| C |    |     |    |     |    |  |     |
| C | 1  | B1  |    |     |    |  |     |
| C | 2  | B2  | 1  | A1  |    |  |     |
| N | 3  | B3  | 2  | A2  | 1  |  | D1  |
| C | 4  | B4  | 3  | A3  | 2  |  | D2  |
| C | 1  | B5  | 2  | A4  | 3  |  | D3  |
| C | 3  | B6  | 2  | A5  | 1  |  | D4  |
| C | 7  | B7  | 3  | A6  | 2  |  | D5  |
| C | 8  | B8  | 7  | A7  | 3  |  | D6  |
| C | 9  | B9  | 8  | A8  | 7  |  | D7  |
| C | 10 | B10 | 9  | A9  | 8  |  | D8  |
| C | 11 | B11 | 10 | A10 | 9  |  | D9  |
| N | 12 | B12 | 11 | A11 | 10 |  | D10 |
| O | 8  | B13 | 7  | A12 | 3  |  | D11 |
| C | 4  | B14 | 3  | A13 | 2  |  | D12 |
| O | 15 | B15 | 4  | A14 | 3  |  | D13 |
| O | 15 | B16 | 4  | A15 | 3  |  | D14 |
| C | 17 | B17 | 15 | A16 | 4  |  | D15 |
| C | 18 | B18 | 17 | A17 | 15 |  | D16 |
| C | 18 | B19 | 17 | A18 | 15 |  | D17 |
| C | 18 | B20 | 17 | A19 | 15 |  | D18 |
| H | 12 | B21 | 11 | A20 | 10 |  | D19 |
| H | 11 | B22 | 10 | A21 | 9  |  | D20 |
| H | 13 | B23 | 12 | A22 | 11 |  | D21 |
| H | 7  | B24 | 3  | A23 | 2  |  | D22 |
| H | 6  | B25 | 1  | A24 | 2  |  | D23 |
| H | 1  | B26 | 6  | A25 | 5  |  | D24 |
| H | 1  | B27 | 6  | A26 | 5  |  | D25 |
| H | 5  | B28 | 4  | A27 | 3  |  | D26 |
| H | 5  | B29 | 4  | A28 | 3  |  | D27 |
| H | 19 | B30 | 18 | A29 | 17 |  | D28 |
| H | 19 | B31 | 18 | A30 | 17 |  | D29 |
| H | 19 | B32 | 18 | A31 | 17 |  | D30 |
| H | 21 | B33 | 18 | A32 | 17 |  | D31 |
| H | 21 | B34 | 18 | A33 | 17 |  | D32 |
| H | 21 | B35 | 18 | A34 | 17 |  | D33 |
| H | 20 | B36 | 18 | A35 | 17 |  | D34 |
| H | 20 | B37 | 18 | A36 | 17 |  | D35 |
| H | 20 | B38 | 18 | A37 | 17 |  | D36 |

|     |            |
|-----|------------|
| B1  | 1.53363197 |
| B2  | 1.47902479 |
| B3  | 1.39277775 |
| B4  | 1.47375930 |
| B5  | 1.48072848 |
| B6  | 1.35806730 |
| B7  | 1.46222923 |
| B8  | 1.44928452 |
| B9  | 1.39027699 |
| B10 | 1.41290945 |
| B11 | 1.38683554 |
| B12 | 1.35721214 |
| B13 | 1.24140261 |
| B14 | 1.38022067 |
| B15 | 1.21714561 |
| B16 | 1.33337605 |
| B17 | 1.46664979 |
| B18 | 1.52295682 |
| B19 | 1.52288274 |
| B20 | 1.52205665 |

|     |               |
|-----|---------------|
| B21 | 1.08470331    |
| B22 | 1.08502617    |
| B23 | 1.02232585    |
| B24 | 1.08326277    |
| B25 | 1.08817964    |
| B26 | 1.08886531    |
| B27 | 1.08665836    |
| B28 | 1.09665220    |
| B29 | 1.09306035    |
| B30 | 1.09516833    |
| B31 | 1.09535248    |
| B32 | 1.09155113    |
| B33 | 1.09451147    |
| B34 | 1.09485589    |
| B35 | 1.09479475    |
| B36 | 1.09520390    |
| B37 | 1.09160246    |
| B38 | 1.09533154    |
| A1  | 113.94955042  |
| A2  | 107.68833439  |
| A3  | 111.96171161  |
| A4  | 60.64107947   |
| A5  | 123.29813513  |
| A6  | 120.93413644  |
| A7  | 114.91300751  |
| A8  | 125.48179414  |
| A9  | 107.40195343  |
| A10 | 106.45933029  |
| A11 | 108.97560563  |
| A12 | 122.47891876  |
| A13 | 124.85742858  |
| A14 | 123.90474307  |
| A15 | 109.39023029  |
| A16 | 121.30729033  |
| A17 | 109.91631667  |
| A18 | 109.98906115  |
| A19 | 102.47234661  |
| A20 | 130.09350195  |
| A21 | 127.70914544  |
| A22 | 125.99239502  |
| A23 | 121.64073874  |
| A24 | 120.79400755  |
| A25 | 119.08551063  |
| A26 | 118.07186463  |
| A27 | 109.81370039  |
| A28 | 110.05927744  |
| A29 | 109.20710774  |
| A30 | 110.29907074  |
| A31 | 111.32983275  |
| A32 | 109.75428120  |
| A33 | 110.66428146  |
| A34 | 110.67079756  |
| A35 | 109.21091985  |
| A36 | 111.36565003  |
| A37 | 110.31006217  |
| D1  | 51.54239209   |
| D2  | 18.30758117   |
| D3  | -95.05142560  |
| D4  | -131.62950894 |
| D5  | -5.73685196   |
| D6  | -3.48997922   |
| D7  | 4.26141089    |
| D8  | 179.86189209  |
| D9  | 0.56184959    |

|     |               |
|-----|---------------|
| D10 | -0.55332990   |
| D11 | 179.68417006  |
| D12 | -170.64475133 |
| D13 | 7.15862253    |
| D14 | -173.03224405 |
| D15 | -179.36961714 |
| D16 | -62.33440146  |
| D17 | 62.16607348   |
| D18 | 179.92212444  |
| D19 | 178.89209456  |
| D20 | -179.85361973 |
| D21 | 179.39442888  |
| D22 | 179.34827976  |
| D23 | -110.43338098 |
| D24 | -11.22533289  |
| D25 | -160.21669495 |
| D26 | 101.31529883  |
| D27 | -139.18766791 |
| D28 | -173.02965056 |
| D29 | -54.33251682  |
| D30 | 66.90919960   |
| D31 | 179.84930935  |
| D32 | -60.38947996  |
| D33 | 60.06348211   |
| D34 | 172.56907198  |
| D35 | -67.41052539  |
| D36 | 53.86085236   |

Number of imaginary frequency=0

Energy=-954.6736301 (a.u.)

**Structure: CPI (3) in water**

|   |    |     |    |     |     |
|---|----|-----|----|-----|-----|
| C |    |     |    |     |     |
| C | 1  | B1  |    |     |     |
| C | 2  | B2  | 1  | A1  |     |
| N | 3  | B3  | 2  | A2  | 1   |
| C | 4  | B4  | 3  | A3  | 2   |
| C | 1  | B5  | 2  | A4  | 3   |
| C | 2  | B6  | 1  | A5  | 6   |
| C | 7  | B7  | 2  | A6  | 1   |
| C | 8  | B8  | 7  | A7  | 2   |
| C | 3  | B9  | 2  | A8  | 1   |
| C | 7  | B10 | 2  | A9  | 1   |
| C | 11 | B11 | 7  | A10 | 2   |
| N | 12 | B12 | 11 | A11 | 7   |
| C | 4  | B13 | 3  | A12 | 2   |
| O | 14 | B14 | 4  | A13 | 3   |
| O | 9  | B15 | 8  | A14 | 7   |
| C | 14 | B16 | 4  | A15 | 3   |
| N | 17 | B17 | 14 | A16 | 4   |
| C | 18 | B18 | 17 | A17 | 14  |
| C | 19 | B19 | 18 | A18 | 17  |
| C | 17 | B20 | 14 | A19 | 4   |
| C | 19 | B21 | 18 | A20 | 17  |
| C | 22 | B22 | 19 | A21 | 18  |
| C | 23 | B23 | 22 | A22 | 19  |
| C | 24 | B24 | 23 | A23 | 22  |
| H | 25 | B25 | 24 | A24 | 23  |
| H | 21 | B26 | 17 | A25 | 14  |
| H | 10 | B27 | 3  | A26 | 2   |
| H | 5  | B28 | 4  | A27 | 3   |
| H | 5  | B29 | 4  | A28 | 3   |
|   |    |     |    |     | D1  |
|   |    |     |    |     | D2  |
|   |    |     |    |     | D3  |
|   |    |     |    |     | D4  |
|   |    |     |    |     | D5  |
|   |    |     |    |     | D6  |
|   |    |     |    |     | D7  |
|   |    |     |    |     | D8  |
|   |    |     |    |     | D9  |
|   |    |     |    |     | D10 |
|   |    |     |    |     | D11 |
|   |    |     |    |     | D12 |
|   |    |     |    |     | D13 |
|   |    |     |    |     | D14 |
|   |    |     |    |     | D15 |
|   |    |     |    |     | D16 |
|   |    |     |    |     | D17 |
|   |    |     |    |     | D18 |
|   |    |     |    |     | D19 |
|   |    |     |    |     | D20 |
|   |    |     |    |     | D21 |
|   |    |     |    |     | D22 |
|   |    |     |    |     | D23 |
|   |    |     |    |     | D24 |
|   |    |     |    |     | D25 |
|   |    |     |    |     | D26 |
|   |    |     |    |     | D27 |

|   |    |     |    |     |    |     |
|---|----|-----|----|-----|----|-----|
| H | 6  | B30 | 1  | A29 | 2  | D28 |
| H | 1  | B31 | 6  | A30 | 5  | D29 |
| H | 1  | B32 | 6  | A31 | 5  | D30 |
| H | 11 | B33 | 7  | A32 | 2  | D31 |
| H | 18 | B34 | 17 | A33 | 14 | D32 |
| H | 13 | B35 | 12 | A34 | 11 | D33 |
| H | 24 | B36 | 23 | A35 | 22 | D34 |
| H | 23 | B37 | 22 | A36 | 19 | D35 |
| H | 22 | B38 | 19 | A37 | 18 | D36 |
| H | 12 | B39 | 11 | A38 | 7  | D37 |

|     |              |
|-----|--------------|
| B1  | 1.53407859   |
| B2  | 1.47776418   |
| B3  | 1.40170033   |
| B4  | 1.47338676   |
| B5  | 1.47994671   |
| B6  | 1.46159253   |
| B7  | 1.39071959   |
| B8  | 1.44770784   |
| B9  | 1.35641582   |
| B10 | 1.41251777   |
| B11 | 1.38691087   |
| B12 | 1.35694375   |
| B13 | 1.37732730   |
| B14 | 1.23081725   |
| B15 | 1.24059020   |
| B16 | 1.47381943   |
| B17 | 1.37795652   |
| B18 | 1.36107108   |
| B19 | 1.42166063   |
| B20 | 1.38481541   |
| B21 | 1.40148167   |
| B22 | 1.38364743   |
| B23 | 1.41381448   |
| B24 | 1.38221006   |
| B25 | 1.08956385   |
| B26 | 1.08145833   |
| B27 | 1.08328213   |
| B28 | 1.09365903   |
| B29 | 1.09704503   |
| B30 | 1.08810715   |
| B31 | 1.08882316   |
| B32 | 1.08660704   |
| B33 | 1.08499812   |
| B34 | 1.02114506   |
| B35 | 1.02232553   |
| B36 | 1.08895571   |
| B37 | 1.08924427   |
| B38 | 1.08909671   |
| B39 | 1.08470804   |
| A1  | 113.71298045 |
| A2  | 108.04702090 |
| A3  | 110.81898480 |
| A4  | 60.53224197  |
| A5  | 120.46531223 |
| A6  | 118.18897516 |
| A7  | 125.43002588 |
| A8  | 123.23190848 |
| A9  | 134.24957896 |
| A10 | 106.44999588 |
| A11 | 109.00899178 |
| A12 | 123.63998688 |
| A13 | 121.40598275 |
| A14 | 122.75730282 |

|     |               |
|-----|---------------|
| A15 | 119.66495439  |
| A16 | 115.12095652  |
| A17 | 109.88299274  |
| A18 | 107.49201078  |
| A19 | 135.99968902  |
| A20 | 130.39699109  |
| A21 | 117.16696393  |
| A22 | 121.65600703  |
| A23 | 121.15801582  |
| A24 | 120.92764826  |
| A25 | 127.63332356  |
| A26 | 121.89803073  |
| A27 | 110.00601521  |
| A28 | 110.07900109  |
| A29 | 120.96355951  |
| A30 | 119.18545106  |
| A31 | 117.97854878  |
| A32 | 127.74400888  |
| A33 | 123.47580995  |
| A34 | 125.97670209  |
| A35 | 119.07596276  |
| A36 | 119.23295756  |
| A37 | 121.20996547  |
| A38 | 130.06101329  |
| D1  | 51.18498944   |
| D2  | 19.36395750   |
| D3  | -95.09091644  |
| D4  | 120.67065282  |
| D5  | 131.46495788  |
| D6  | 4.17295995    |
| D7  | -132.78726748 |
| D8  | -43.18159517  |
| D9  | 175.56436362  |
| D10 | -0.51997930   |
| D11 | -160.83001265 |
| D12 | 7.74698715    |
| D13 | -179.23500867 |
| D14 | -172.83000917 |
| D15 | -166.72002182 |
| D16 | -176.65101145 |
| D17 | 0.51703972    |
| D18 | 18.45484550   |
| D19 | -179.47963714 |
| D20 | -179.72371784 |
| D21 | -0.07605453   |
| D22 | -0.06992240   |
| D23 | -179.90350875 |
| D24 | -2.47655254   |
| D25 | 179.21526179  |
| D26 | -140.57252451 |
| D27 | 99.06251840   |
| D28 | -110.48614034 |
| D29 | -11.48494944  |
| D30 | -160.51201720 |
| D31 | -4.83394518   |
| D32 | 1.92983182    |
| D33 | 179.23913756  |
| D34 | 180.00000000  |
| D35 | 179.86398354  |
| D36 | 0.14521885    |
| D37 | 178.94897906  |

Number of imaginary frequency=0

|                                              |                             |
|----------------------------------------------|-----------------------------|
| Zero-point correction=                       | 0.316637 (Hartree/Particle) |
| Thermal correction to Energy=                | 0.334767                    |
| Thermal correction to Enthalpy=              | 0.335711                    |
| Thermal correction to Gibbs Free Energy=     | 0.270337                    |
| Sum of electronic and zero-point Energies=   | -1084.319469                |
| Sum of electronic and thermal Energies=      | -1084.301339                |
| Sum of electronic and thermal Enthalpies=    | -1084.300394                |
| Sum of electronic and thermal Free Energies= | -1084.365768                |

**Structure: DSI (2) in water**

|    |            |     |    |     |    |     |
|----|------------|-----|----|-----|----|-----|
| C  |            |     |    |     |    |     |
| C  | 1          | B1  |    |     |    |     |
| C  | 2          | B2  | 1  | A1  |    |     |
| N  | 3          | B3  | 2  | A2  | 1  | D1  |
| C  | 4          | B4  | 3  | A3  | 2  | D2  |
| C  | 2          | B5  | 1  | A4  | 5  | D3  |
| C  | 6          | B6  | 2  | A5  | 1  | D4  |
| C  | 7          | B7  | 6  | A6  | 2  | D5  |
| C  | 3          | B8  | 2  | A7  | 1  | D6  |
| C  | 6          | B9  | 2  | A8  | 1  | D7  |
| C  | 10         | B10 | 6  | A9  | 2  | D8  |
| N  | 7          | B11 | 6  | A10 | 2  | D9  |
| C  | 10         | B12 | 6  | A11 | 2  | D10 |
| C  | 12         | B13 | 7  | A12 | 6  | D11 |
| O  | 14         | B14 | 12 | A13 | 7  | D12 |
| O  | 9          | B15 | 3  | A14 | 2  | D13 |
| C  | 5          | B16 | 4  | A15 | 3  | D14 |
| O  | 17         | B17 | 5  | A16 | 4  | D15 |
| C  | 14         | B18 | 12 | A17 | 7  | D16 |
| C  | 19         | B19 | 14 | A18 | 12 | D17 |
| C  | 20         | B20 | 19 | A19 | 14 | D18 |
| C  | 21         | B21 | 20 | A20 | 19 | D19 |
| N  | 22         | B22 | 21 | A21 | 20 | D20 |
| C  | 22         | B23 | 21 | A22 | 20 | D21 |
| C  | 24         | B24 | 22 | A23 | 21 | D22 |
| C  | 25         | B25 | 24 | A24 | 22 | D23 |
| C  | 26         | B26 | 25 | A25 | 24 | D24 |
| O  | 17         | B27 | 5  | A26 | 4  | D25 |
| C  | 28         | B28 | 17 | A27 | 5  | D26 |
| H  | 24         | B29 | 22 | A28 | 21 | D27 |
| H  | 25         | B30 | 24 | A29 | 22 | D28 |
| H  | 26         | B31 | 25 | A30 | 24 | D29 |
| H  | 27         | B32 | 26 | A31 | 25 | D30 |
| H  | 20         | B33 | 19 | A32 | 14 | D31 |
| H  | 8          | B34 | 7  | A33 | 6  | D32 |
| H  | 11         | B35 | 10 | A34 | 6  | D33 |
| H  | 11         | B36 | 10 | A35 | 6  | D34 |
| H  | 10         | B37 | 6  | A36 | 2  | D35 |
| H  | 13         | B38 | 10 | A37 | 6  | D36 |
| H  | 13         | B39 | 10 | A38 | 6  | D37 |
| H  | 1          | B40 | 5  | A39 | 4  | D38 |
| H  | 29         | B41 | 28 | A40 | 17 | D39 |
| H  | 29         | B42 | 28 | A41 | 17 | D40 |
| H  | 29         | B43 | 28 | A42 | 17 | D41 |
| H  | 23         | B44 | 22 | A43 | 21 | D42 |
| H  | 4          | B45 | 3  | A44 | 2  | D43 |
| B1 | 1.40549287 |     |    |     |    |     |
| B2 | 1.39420875 |     |    |     |    |     |
| B3 | 1.35530075 |     |    |     |    |     |
| B4 | 1.36344767 |     |    |     |    |     |
| B5 | 1.46142413 |     |    |     |    |     |
| B6 | 1.47758964 |     |    |     |    |     |

|     |              |
|-----|--------------|
| B7  | 1.35897898   |
| B8  | 1.45720592   |
| B9  | 1.51948227   |
| B10 | 1.51037325   |
| B11 | 1.39831984   |
| B12 | 1.47969749   |
| B13 | 1.38045789   |
| B14 | 1.22978473   |
| B15 | 1.23731819   |
| B16 | 1.46018277   |
| B17 | 1.21802188   |
| B18 | 1.47265036   |
| B19 | 1.38509251   |
| B20 | 1.42317296   |
| B21 | 1.42169721   |
| B22 | 1.36095074   |
| B23 | 1.40158847   |
| B24 | 1.38351235   |
| B25 | 1.41399602   |
| B26 | 1.38198637   |
| B27 | 1.33706471   |
| B28 | 1.42922972   |
| B29 | 1.08909801   |
| B30 | 1.08925703   |
| B31 | 1.08896550   |
| B32 | 1.08956646   |
| B33 | 1.08134402   |
| B34 | 1.08322006   |
| B35 | 1.09360518   |
| B36 | 1.09687725   |
| B37 | 1.08827255   |
| B38 | 1.08883486   |
| B39 | 1.08668824   |
| B40 | 1.08488078   |
| B41 | 1.08991801   |
| B42 | 1.09323706   |
| B43 | 1.09322242   |
| B44 | 1.02119326   |
| B45 | 1.02446811   |
| A1  | 107.30475658 |
| A2  | 108.48881016 |
| A3  | 108.95397718 |
| A4  | 134.33660556 |
| A5  | 115.77194523 |
| A6  | 123.42536120 |
| A7  | 125.23393570 |
| A8  | 129.96740600 |
| A9  | 106.45058598 |
| A10 | 108.05063327 |
| A11 | 61.51103259  |
| A12 | 123.58165440 |
| A13 | 121.20691214 |
| A14 | 122.05720985 |
| A15 | 119.68210116 |
| A16 | 123.89784521 |
| A17 | 119.70926479 |
| A18 | 135.94704265 |
| A19 | 107.01637735 |
| A20 | 106.89574876 |
| A21 | 107.51288838 |
| A22 | 122.09361688 |
| A23 | 117.16348152 |
| A24 | 121.66908816 |
| A25 | 121.15554716 |

|     |               |
|-----|---------------|
| A26 | 112.03134888  |
| A27 | 115.22049679  |
| A28 | 121.21368641  |
| A29 | 119.22881854  |
| A30 | 119.08593859  |
| A31 | 120.93499418  |
| A32 | 127.69168308  |
| A33 | 121.80331941  |
| A34 | 112.26043545  |
| A35 | 110.79763625  |
| A36 | 120.59259204  |
| A37 | 119.30035782  |
| A38 | 117.96081352  |
| A39 | 125.51679686  |
| A40 | 105.57044298  |
| A41 | 110.50730382  |
| A42 | 110.51576382  |
| A43 | 126.56851107  |
| A44 | 125.61129251  |
| D1  | -0.35541283   |
| D2  | 0.05916291    |
| D3  | 175.72542594  |
| D4  | 172.82423900  |
| D5  | 13.71605475   |
| D6  | -179.73137905 |
| D7  | 28.18855837   |
| D8  | 145.29516059  |
| D9  | -162.61186039 |
| D10 | -104.82435082 |
| D11 | -161.41812266 |
| D12 | 8.09176262    |
| D13 | -179.15543546 |
| D14 | -179.48242668 |
| D15 | -0.11881302   |
| D16 | -172.47034366 |
| D17 | 17.72556313   |
| D18 | 175.36018856  |
| D19 | 0.16426255    |
| D20 | -0.47641069   |
| D21 | 179.58772913  |
| D22 | 0.28476474    |
| D23 | -0.09074322   |
| D24 | -0.04165591   |
| D25 | -179.95474175 |
| D26 | 179.80586500  |
| D27 | -179.86591823 |
| D28 | 179.87305058  |
| D29 | -180.00000000 |
| D30 | -179.90852858 |
| D31 | -2.23945558   |
| D32 | 178.84363376  |
| D33 | 131.37818290  |
| D34 | -106.15884710 |
| D35 | 6.22064734    |
| D36 | -107.35141075 |
| D37 | 103.49398626  |
| D38 | 179.80245176  |
| D39 | 179.98225178  |
| D40 | -60.57632639  |
| D41 | 60.52994154   |
| D42 | -178.76506044 |
| D43 | -179.27331826 |

Number of imaginary frequency:0



Energy= -1312.3152893(a.u.)

**Structure: DSA (1) in water**

|   |    |     |    |     |    |     |
|---|----|-----|----|-----|----|-----|
| C |    |     |    |     |    |     |
| C | 1  | B1  |    |     |    |     |
| C | 2  | B2  | 1  | A1  |    |     |
| C | 3  | B3  | 2  | A2  | 1  | D1  |
| C | 4  | B4  | 3  | A3  | 2  | D2  |
| C | 1  | B5  | 2  | A4  | 3  | D3  |
| N | 3  | B6  | 2  | A5  | 1  | D4  |
| C | 7  | B7  | 3  | A6  | 2  | D5  |
| C | 8  | B8  | 7  | A7  | 3  | D6  |
| C | 8  | B9  | 7  | A8  | 3  | D7  |
| O | 10 | B10 | 8  | A9  | 7  | D8  |
| O | 4  | B11 | 3  | A10 | 2  | D9  |
| C | 12 | B12 | 4  | A11 | 3  | D10 |
| O | 5  | B13 | 4  | A12 | 3  | D11 |
| C | 14 | B14 | 5  | A13 | 4  | D12 |
| O | 6  | B15 | 1  | A14 | 2  | D13 |
| C | 16 | B16 | 6  | A15 | 1  | D14 |
| N | 10 | B17 | 8  | A16 | 7  | D15 |
| C | 18 | B18 | 10 | A17 | 8  | D16 |
| C | 19 | B19 | 18 | A18 | 10 | D17 |
| C | 20 | B20 | 19 | A19 | 18 | D18 |
| C | 18 | B21 | 10 | A20 | 8  | D19 |
| C | 19 | B22 | 18 | A21 | 10 | D20 |
| C | 23 | B23 | 19 | A22 | 18 | D21 |
| C | 24 | B24 | 23 | A23 | 19 | D22 |
| C | 25 | B25 | 24 | A24 | 23 | D23 |
| C | 26 | B26 | 25 | A25 | 24 | D24 |
| C | 27 | B27 | 26 | A26 | 25 | D25 |
| N | 25 | B28 | 24 | A27 | 23 | D26 |
| C | 21 | B29 | 20 | A28 | 19 | D27 |
| C | 28 | B30 | 27 | A29 | 26 | D28 |
| O | 31 | B31 | 28 | A30 | 27 | D29 |
| C | 32 | B32 | 31 | A31 | 28 | D30 |
| O | 24 | B33 | 23 | A32 | 19 | D31 |
| O | 31 | B34 | 28 | A33 | 27 | D32 |
| H | 1  | B35 | 6  | A34 | 16 | D33 |
| H | 9  | B36 | 8  | A35 | 7  | D34 |
| H | 23 | B37 | 19 | A36 | 18 | D35 |
| H | 22 | B38 | 18 | A37 | 10 | D36 |
| H | 22 | B39 | 18 | A38 | 10 | D37 |
| H | 21 | B40 | 20 | A39 | 19 | D38 |
| H | 30 | B41 | 21 | A40 | 20 | D39 |
| H | 30 | B42 | 21 | A41 | 20 | D40 |
| H | 13 | B43 | 12 | A42 | 4  | D41 |
| H | 13 | B44 | 12 | A43 | 4  | D42 |
| H | 13 | B45 | 12 | A44 | 4  | D43 |
| H | 15 | B46 | 14 | A45 | 5  | D44 |
| H | 15 | B47 | 14 | A46 | 5  | D45 |
| H | 15 | B48 | 14 | A47 | 5  | D46 |
| H | 27 | B49 | 26 | A48 | 25 | D47 |
| H | 17 | B50 | 16 | A49 | 6  | D48 |
| H | 17 | B51 | 16 | A50 | 6  | D49 |
| H | 17 | B52 | 16 | A51 | 6  | D50 |
| H | 33 | B53 | 32 | A52 | 31 | D51 |
| H | 33 | B54 | 32 | A53 | 31 | D52 |
| H | 33 | B55 | 32 | A54 | 31 | D53 |
| H | 7  | B56 | 3  | A55 | 2  | D54 |
| H | 29 | B57 | 25 | A56 | 24 | D55 |

|     |              |
|-----|--------------|
| B1  | 1.41221610   |
| B2  | 1.41384967   |
| B3  | 1.40544680   |
| B4  | 1.38611081   |
| B5  | 1.38157279   |
| B6  | 1.35919747   |
| B7  | 1.37680798   |
| B8  | 1.38825816   |
| B9  | 1.47145929   |
| B10 | 1.23024707   |
| B11 | 1.36364515   |
| B12 | 1.42775588   |
| B13 | 1.36789450   |
| B14 | 1.42496591   |
| B15 | 1.35762050   |
| B16 | 1.41279167   |
| B17 | 1.38089729   |
| B18 | 1.39785324   |
| B19 | 1.47786881   |
| B20 | 1.51903713   |
| B21 | 1.47375716   |
| B22 | 1.35934085   |
| B23 | 1.45919126   |
| B24 | 1.45697346   |
| B25 | 1.39408871   |
| B26 | 1.40561769   |
| B27 | 1.39339358   |
| B28 | 1.35498356   |
| B29 | 1.47983772   |
| B30 | 1.46008902   |
| B31 | 1.33695210   |
| B32 | 1.42914681   |
| B33 | 1.23759423   |
| B34 | 1.21805079   |
| B35 | 1.08599033   |
| B36 | 1.08122428   |
| B37 | 1.08292084   |
| B38 | 1.09356423   |
| B39 | 1.09689881   |
| B40 | 1.08818512   |
| B41 | 1.08880758   |
| B42 | 1.08664749   |
| B43 | 1.09262435   |
| B44 | 1.09667881   |
| B45 | 1.09205420   |
| B46 | 1.09645985   |
| B47 | 1.09534468   |
| B48 | 1.09238197   |
| B49 | 1.08477973   |
| B50 | 1.09133955   |
| B51 | 1.09761482   |
| B52 | 1.09759917   |
| B53 | 1.08991526   |
| B54 | 1.09322112   |
| B55 | 1.09319815   |
| B56 | 1.01997790   |
| B57 | 1.02394905   |
| A1  | 120.19821032 |
| A2  | 121.85564016 |
| A3  | 117.37337028 |
| A4  | 118.12029539 |
| A5  | 108.35176561 |
| A6  | 109.39763970 |
| A7  | 108.58762975 |

|     |               |
|-----|---------------|
| A8  | 114.99233818  |
| A9  | 119.08203127  |
| A10 | 118.84661149  |
| A11 | 115.41219917  |
| A12 | 119.67827636  |
| A13 | 113.44912304  |
| A14 | 125.09961713  |
| A15 | 117.07161234  |
| A16 | 119.76641130  |
| A17 | 123.64536027  |
| A18 | 108.02617947  |
| A19 | 106.52011929  |
| A20 | 125.35141119  |
| A21 | 128.48107262  |
| A22 | 121.05378841  |
| A23 | 114.86586969  |
| A24 | 125.25437421  |
| A25 | 107.30586136  |
| A26 | 106.34975070  |
| A27 | 126.25132797  |
| A28 | 61.53252184   |
| A29 | 131.47168857  |
| A30 | 112.04571193  |
| A31 | 115.24338626  |
| A32 | 123.05991418  |
| A33 | 123.87092974  |
| A34 | 121.94328140  |
| A35 | 127.70876321  |
| A36 | 121.78824572  |
| A37 | 109.97735288  |
| A38 | 110.03267967  |
| A39 | 120.61665803  |
| A40 | 119.25562736  |
| A41 | 117.97932319  |
| A42 | 111.07038852  |
| A43 | 110.52724805  |
| A44 | 105.98401178  |
| A45 | 110.69386203  |
| A46 | 110.85927377  |
| A47 | 106.39314659  |
| A48 | 128.14378016  |
| A49 | 106.05034075  |
| A50 | 111.36584112  |
| A51 | 111.33548112  |
| A52 | 105.57011842  |
| A53 | 110.51620669  |
| A54 | 110.50735011  |
| A55 | 126.87407821  |
| A56 | 125.56790412  |
| D1  | -1.04139145   |
| D2  | 0.32686814    |
| D3  | 0.79957954    |
| D4  | 179.50916832  |
| D5  | 0.49896564    |
| D6  | -0.56417184   |
| D7  | -177.24738583 |
| D8  | 11.45640271   |
| D9  | -177.24088145 |
| D10 | -118.80204392 |
| D11 | 179.20384255  |
| D12 | 98.14082800   |
| D13 | 179.73801381  |
| D14 | -1.37974687   |
| D15 | -167.89044471 |

|     |               |
|-----|---------------|
| D16 | -172.45599597 |
| D17 | -162.11154496 |
| D18 | -10.02152837  |
| D19 | 6.58069169    |
| D20 | 21.77560406   |
| D21 | 169.62292913  |
| D22 | -3.13328088   |
| D23 | 3.99749996    |
| D24 | -179.51287852 |
| D25 | 0.48225889    |
| D26 | -175.07524442 |
| D27 | 108.04780694  |
| D28 | 178.99311503  |
| D29 | 0.33679372    |
| D30 | -179.87700226 |
| D31 | -179.88126116 |
| D32 | -179.55650957 |
| D33 | -0.05223572   |
| D34 | -177.49140071 |
| D35 | -5.60957138   |
| D36 | 40.85933612   |
| D37 | -79.55571084  |
| D38 | -140.91471961 |
| D39 | -107.32847774 |
| D40 | 103.50157609  |
| D41 | -64.52155000  |
| D42 | 57.63970887   |
| D43 | 176.04091224  |
| D44 | -59.93624580  |
| D45 | 62.22036480   |
| D46 | -178.81034588 |
| D47 | -179.89672791 |
| D48 | -179.45360006 |
| D49 | -60.43539197  |
| D50 | 61.62155770   |
| D51 | -179.99617910 |
| D52 | -60.54234456  |
| D53 | 60.55616823   |
| D54 | -179.62262121 |
| D55 | 0.07306545    |

Number of imaginary frequency:0

Energy= -1655.4950636(a.u.)

**Structure: N-Boc-CPI (4) with 1 explicit molecule of water**

|   |    |     |    |     |   |     |
|---|----|-----|----|-----|---|-----|
| C |    |     |    |     |   |     |
| C | 1  | B1  |    |     |   |     |
| C | 2  | B2  | 1  | A1  |   |     |
| N | 3  | B3  | 2  | A2  | 1 | D1  |
| C | 4  | B4  | 3  | A3  | 2 | D2  |
| C | 1  | B5  | 2  | A4  | 3 | D3  |
| C | 2  | B6  | 1  | A5  | 6 | D4  |
| C | 7  | B7  | 2  | A6  | 1 | D5  |
| C | 8  | B8  | 7  | A7  | 2 | D6  |
| C | 3  | B9  | 2  | A8  | 1 | D7  |
| N | 8  | B10 | 7  | A9  | 2 | D8  |
| C | 11 | B11 | 8  | A10 | 7 | D9  |
| C | 12 | B12 | 11 | A11 | 8 | D10 |
| O | 9  | B13 | 8  | A12 | 7 | D11 |
| C | 4  | B14 | 3  | A13 | 2 | D12 |
| O | 15 | B15 | 4  | A14 | 3 | D13 |
| C | 16 | B16 | 15 | A15 | 4 | D14 |

|   |    |     |    |     |    |     |
|---|----|-----|----|-----|----|-----|
| C | 17 | B17 | 16 | A16 | 15 | D15 |
| O | 15 | B18 | 4  | A17 | 3  | D16 |
| C | 17 | B19 | 16 | A18 | 15 | D17 |
| C | 17 | B20 | 16 | A19 | 15 | D18 |
| O | 14 | B21 | 9  | A20 | 8  | D19 |
| H | 12 | B22 | 11 | A21 | 8  | D20 |
| H | 11 | B23 | 8  | A22 | 7  | D21 |
| H | 22 | B24 | 14 | A23 | 9  | D22 |
| H | 13 | B25 | 12 | A24 | 11 | D23 |
| H | 22 | B26 | 14 | A25 | 9  | D24 |
| H | 6  | B27 | 1  | A26 | 2  | D25 |
| H | 1  | B28 | 6  | A27 | 5  | D26 |
| H | 1  | B29 | 6  | A28 | 5  | D27 |
| H | 5  | B30 | 4  | A29 | 3  | D28 |
| H | 5  | B31 | 4  | A30 | 3  | D29 |
| H | 10 | B32 | 3  | A31 | 2  | D30 |
| H | 18 | B33 | 17 | A32 | 16 | D31 |
| H | 18 | B34 | 17 | A33 | 16 | D32 |
| H | 18 | B35 | 17 | A34 | 16 | D33 |
| H | 20 | B36 | 17 | A35 | 16 | D34 |
| H | 20 | B37 | 17 | A36 | 16 | D35 |
| H | 20 | B38 | 17 | A37 | 16 | D36 |
| H | 21 | B39 | 17 | A38 | 16 | D37 |
| H | 21 | B40 | 17 | A39 | 16 | D38 |
| H | 21 | B41 | 17 | A40 | 16 | D39 |

|     |            |
|-----|------------|
| B1  | 1.52930151 |
| B2  | 1.48043700 |
| B3  | 1.39666612 |
| B4  | 1.47045354 |
| B5  | 1.48367805 |
| B6  | 1.46237154 |
| B7  | 1.39133291 |
| B8  | 1.45104594 |
| B9  | 1.35357115 |
| B10 | 1.36760011 |
| B11 | 1.35306898 |
| B12 | 1.38723055 |
| B13 | 1.24244599 |
| B14 | 1.38132885 |
| B15 | 1.34138076 |
| B16 | 1.46265382 |
| B17 | 1.52370956 |
| B18 | 1.21193462 |
| B19 | 1.52266061 |
| B20 | 1.52363779 |
| B21 | 2.71968252 |
| B22 | 1.08132040 |
| B23 | 1.03217446 |
| B24 | 0.98884028 |
| B25 | 1.08221522 |
| B26 | 0.96548703 |
| B27 | 1.08528829 |
| B28 | 1.08781218 |
| B29 | 1.08552678 |
| B30 | 1.09291460 |
| B31 | 1.09692619 |
| B32 | 1.08148163 |
| B33 | 1.09118892 |
| B34 | 1.09523450 |
| B35 | 1.09533767 |
| B36 | 1.09474861 |
| B37 | 1.09468931 |
| B38 | 1.09438449 |

|     |               |
|-----|---------------|
| B39 | 1.09523117    |
| B40 | 1.09121219    |
| B41 | 1.09531487    |
| A1  | 113.98605191  |
| A2  | 107.54993962  |
| A3  | 111.90997538  |
| A4  | 60.54152595   |
| A5  | 120.29370563  |
| A6  | 118.32297913  |
| A7  | 124.92400844  |
| A8  | 123.32797486  |
| A9  | 108.06699356  |
| A10 | 108.93496840  |
| A11 | 109.34904241  |
| A12 | 123.79797063  |
| A13 | 124.56992733  |
| A14 | 109.16796002  |
| A15 | 120.42702771  |
| A16 | 110.11797358  |
| A17 | 124.25308836  |
| A18 | 102.52100976  |
| A19 | 109.99599434  |
| A20 | 115.34003462  |
| A21 | 120.93780951  |
| A22 | 123.11401939  |
| A23 | 12.03999500   |
| A24 | 125.77590046  |
| A25 | 103.01503551  |
| A26 | 120.73130550  |
| A27 | 119.02946491  |
| A28 | 118.21161303  |
| A29 | 110.09095776  |
| A30 | 110.01002599  |
| A31 | 121.81250214  |
| A32 | 111.24598235  |
| A33 | 109.34296785  |
| A34 | 110.30599601  |
| A35 | 110.72101854  |
| A36 | 110.67999095  |
| A37 | 109.94397554  |
| A38 | 109.39496995  |
| A39 | 111.20097412  |
| A40 | 110.31700496  |
| D1  | 51.77096710   |
| D2  | 18.44508616   |
| D3  | -95.12644624  |
| D4  | 120.94650432  |
| D5  | 130.04341425  |
| D6  | 4.23999952    |
| D7  | -131.00782156 |
| D8  | -175.84504148 |
| D9  | 0.12203272    |
| D10 | 0.21395334    |
| D11 | -178.50499066 |
| D12 | -172.21714171 |
| D13 | -173.41594207 |
| D14 | -179.73397649 |
| D15 | 61.88100391   |
| D16 | 6.72309689    |
| D17 | 179.71698765  |
| D18 | -62.50498164  |
| D19 | -1.67902682   |
| D20 | -179.29928109 |
| D21 | -179.60002650 |

|     |               |
|-----|---------------|
| D22 | 156.80912188  |
| D23 | -179.97942793 |
| D24 | -108.38199495 |
| D25 | -110.50871933 |
| D26 | -11.46062736  |
| D27 | -160.24297457 |
| D28 | -139.71107834 |
| D29 | 101.10196979  |
| D30 | 178.45305156  |
| D31 | -66.94000284  |
| D32 | 172.87204339  |
| D33 | 54.18402151   |
| D34 | -60.50001925  |
| D35 | 59.86601703   |
| D36 | 179.66899476  |
| D37 | -173.37904664 |
| D38 | 66.48498317   |
| D39 | -54.64203870  |

Number of imaginary frequency:0

|                                              |                             |
|----------------------------------------------|-----------------------------|
| Zero-point correction=                       | 0.349082 (Hartree/Particle) |
| Thermal correction to Energy=                | 0.370053                    |
| Thermal correction to Enthalpy=              | 0.370998                    |
| Thermal correction to Gibbs Free Energy=     | 0.299778                    |
| Sum of electronic and zero-point Energies=   | -1030.653288                |
| Sum of electronic and thermal Energies=      | -1030.632316                |
| Sum of electronic and thermal Enthalpies=    | -1030.631372                |
| Sum of electronic and thermal Free Energies= | -1030.702592                |

**Structure: N-Boc-CPI (4) with 2 explicit molecules of water**

|   |    |     |    |     |     |
|---|----|-----|----|-----|-----|
| C |    |     |    |     |     |
| C | 1  | B1  |    |     |     |
| C | 2  | B2  | 1  | A1  |     |
| N | 3  | B3  | 2  | A2  | 1   |
| C | 4  | B4  | 3  | A3  | 2   |
| C | 3  | B5  | 2  | A4  | 1   |
| C | 6  | B6  | 3  | A5  | 2   |
| C | 7  | B7  | 6  | A6  | 3   |
| C | 2  | B8  | 1  | A7  | 5   |
| N | 8  | B9  | 7  | A8  | 6   |
| C | 10 | B10 | 8  | A9  | 7   |
| C | 11 | B11 | 10 | A10 | 8   |
| C | 12 | B12 | 11 | A11 | 10  |
| C | 10 | B13 | 8  | A12 | 7   |
| O | 14 | B14 | 10 | A13 | 8   |
| O | 6  | B15 | 3  | A14 | 2   |
| O | 14 | B16 | 10 | A15 | 8   |
| C | 17 | B17 | 14 | A16 | 10  |
| C | 18 | B18 | 17 | A17 | 14  |
| C | 18 | B19 | 17 | A18 | 14  |
| C | 18 | B20 | 17 | A19 | 14  |
| O | 16 | B21 | 6  | A20 | 3   |
| O | 16 | B22 | 6  | A21 | 3   |
| H | 5  | B23 | 4  | A22 | 3   |
| H | 4  | B24 | 3  | A23 | 2   |
| H | 22 | B25 | 16 | A24 | 6   |
| H | 1  | B26 | 5  | A25 | 4   |
| H | 22 | B27 | 16 | A26 | 6   |
| H | 12 | B28 | 11 | A27 | 10  |
| H | 13 | B29 | 12 | A28 | 11  |
| H | 13 | B30 | 12 | A29 | 11  |
| H | 11 | B31 | 10 | A30 | 8   |
|   |    |     |    |     | D1  |
|   |    |     |    |     | D2  |
|   |    |     |    |     | D3  |
|   |    |     |    |     | D4  |
|   |    |     |    |     | D5  |
|   |    |     |    |     | D6  |
|   |    |     |    |     | D7  |
|   |    |     |    |     | D8  |
|   |    |     |    |     | D9  |
|   |    |     |    |     | D10 |
|   |    |     |    |     | D11 |
|   |    |     |    |     | D12 |
|   |    |     |    |     | D13 |
|   |    |     |    |     | D14 |
|   |    |     |    |     | D15 |
|   |    |     |    |     | D16 |
|   |    |     |    |     | D17 |
|   |    |     |    |     | D18 |
|   |    |     |    |     | D19 |
|   |    |     |    |     | D20 |
|   |    |     |    |     | D21 |
|   |    |     |    |     | D22 |
|   |    |     |    |     | D23 |
|   |    |     |    |     | D24 |
|   |    |     |    |     | D25 |
|   |    |     |    |     | D26 |
|   |    |     |    |     | D27 |
|   |    |     |    |     | D28 |
|   |    |     |    |     | D29 |

|   |    |     |    |     |    |     |
|---|----|-----|----|-----|----|-----|
| H | 11 | B32 | 10 | A31 | 8  | D30 |
| H | 7  | B33 | 6  | A32 | 3  | D31 |
| H | 21 | B34 | 18 | A33 | 17 | D32 |
| H | 21 | B35 | 18 | A34 | 17 | D33 |
| H | 21 | B36 | 18 | A35 | 17 | D34 |
| H | 19 | B37 | 18 | A36 | 17 | D35 |
| H | 19 | B38 | 18 | A37 | 17 | D36 |
| H | 19 | B39 | 18 | A38 | 17 | D37 |
| H | 20 | B40 | 18 | A39 | 17 | D38 |
| H | 20 | B41 | 18 | A40 | 17 | D39 |
| H | 20 | B42 | 18 | A41 | 17 | D40 |
| H | 23 | B43 | 16 | A42 | 6  | D41 |
| H | 23 | B44 | 16 | A43 | 6  | D42 |

|     |              |
|-----|--------------|
| B1  | 1.40871778   |
| B2  | 1.39263064   |
| B3  | 1.36817565   |
| B4  | 1.35221690   |
| B5  | 1.44520765   |
| B6  | 1.45701779   |
| B7  | 1.35533504   |
| B8  | 1.46120810   |
| B9  | 1.39361337   |
| B10 | 1.46930383   |
| B11 | 1.51213772   |
| B12 | 1.48232713   |
| B13 | 1.38394938   |
| B14 | 1.21058079   |
| B15 | 1.25166500   |
| B16 | 1.34014068   |
| B17 | 1.46417705   |
| B18 | 1.52251188   |
| B19 | 1.52342376   |
| B20 | 1.52360502   |
| B21 | 2.73490335   |
| B22 | 2.84010159   |
| B23 | 1.08131963   |
| B24 | 1.03232726   |
| B25 | 0.98592041   |
| B26 | 1.08208049   |
| B27 | 0.96560010   |
| B28 | 1.08520588   |
| B29 | 1.08775371   |
| B30 | 1.08551341   |
| B31 | 1.09278613   |
| B32 | 1.09684015   |
| B33 | 1.08401107   |
| B34 | 1.09116771   |
| B35 | 1.09521321   |
| B36 | 1.09541388   |
| B37 | 1.09482721   |
| B38 | 1.09464873   |
| B39 | 1.09436728   |
| B40 | 1.09519496   |
| B41 | 1.09132267   |
| B42 | 1.09525215   |
| B43 | 0.96470136   |
| B44 | 0.97635548   |
| A1  | 107.30398573 |
| A2  | 108.08101517 |
| A3  | 108.86498623 |
| A4  | 124.70896023 |
| A5  | 115.97303565 |
| A6  | 120.30900623 |



|     |               |
|-----|---------------|
| A7  | 134.28771835  |
| A8  | 128.78330183  |
| A9  | 111.87099085  |
| A10 | 103.78903282  |
| A11 | 114.78001002  |
| A12 | 124.51168137  |
| A13 | 124.02102153  |
| A14 | 122.85899383  |
| A15 | 109.12599328  |
| A16 | 120.30701375  |
| A17 | 102.50897599  |
| A18 | 109.92096414  |
| A19 | 110.07200719  |
| A20 | 115.89499257  |
| A21 | 109.97201117  |
| A22 | 120.91099732  |
| A23 | 123.32400191  |
| A24 | 13.01195403   |
| A25 | 125.76524292  |
| A26 | 103.78799595  |
| A27 | 118.97602576  |
| A28 | 119.05901902  |
| A29 | 118.23504259  |
| A30 | 110.12149854  |
| A31 | 110.06765621  |
| A32 | 117.13465481  |
| A33 | 111.23698637  |
| A34 | 109.31693331  |
| A35 | 110.34097588  |
| A36 | 110.76802020  |
| A37 | 110.67599512  |
| A38 | 109.91697974  |
| A39 | 109.35500344  |
| A40 | 111.25201189  |
| A41 | 110.34903839  |
| A42 | 101.36393760  |
| A43 | 7.87101156    |
| D1  | -0.37496843   |
| D2  | 0.06498431    |
| D3  | 179.85799178  |
| D4  | 4.72903118    |
| D5  | -4.50206304   |
| D6  | 175.03677939  |
| D7  | 171.07470248  |
| D8  | -156.92395255 |
| D9  | -19.52302529  |
| D10 | -53.84497197  |
| D11 | 14.28222726   |
| D12 | 8.01050995    |
| D13 | -178.34796666 |
| D14 | -172.34345406 |
| D15 | 179.63404867  |
| D16 | -179.89003620 |
| D17 | -62.05507580  |
| D18 | 62.27394092   |
| D19 | -2.41801232   |
| D20 | -171.54797820 |
| D21 | -179.23794256 |
| D22 | -179.15000247 |
| D23 | 159.93516770  |
| D24 | 179.98123079  |
| D25 | -108.09192676 |
| D26 | 152.14795521  |
| D27 | -11.43898883  |

|     |               |
|-----|---------------|
| D28 | -160.38007783 |
| D29 | -140.58237599 |
| D30 | 100.11623147  |
| D31 | 170.69272424  |
| D32 | -67.09301414  |
| D33 | 172.78201502  |
| D34 | 54.10104544   |
| D35 | -60.60103888  |
| D36 | 59.82197491   |
| D37 | 179.58596430  |
| D38 | -173.75202021 |
| D39 | 66.10305537   |
| D40 | -55.02796487  |
| D41 | -79.11507595  |
| D42 | 175.72003865  |

Number of imaginary frequency:0

|                                              |                             |
|----------------------------------------------|-----------------------------|
| Zero-point correction=                       | 0.373925 (Hartree/Particle) |
| Thermal correction to Energy=                | 0.398199                    |
| Thermal correction to Enthalpy=              | 0.399143                    |
| Thermal correction to Gibbs Free Energy=     | 0.319845                    |
| Sum of electronic and zero-point Energies=   | -1106.969126                |
| Sum of electronic and thermal Energies=      | -1106.944852                |
| Sum of electronic and thermal Enthalpies=    | -1106.943908                |
| Sum of electronic and thermal Free Energies= | -1107.023205                |

**Structure: Transition State of N-Boc-CPI (4) with Pyridine**

|   |    |     |    |     |     |
|---|----|-----|----|-----|-----|
| C |    |     |    |     |     |
| H | 1  | B1  |    |     |     |
| H | 1  | B2  | 2  | A1  |     |
| C | 1  | B3  | 3  | A2  | 2   |
| H | 4  | B4  | 1  | A3  | 3   |
| C | 4  | B5  | 1  | A4  | 3   |
| H | 6  | B6  | 4  | A5  | 1   |
| H | 6  | B7  | 4  | A6  | 1   |
| C | 4  | B8  | 1  | A7  | 6   |
| C | 9  | B9  | 4  | A8  | 1   |
| N | 10 | B10 | 9  | A9  | 4   |
| C | 9  | B11 | 4  | A10 | 1   |
| C | 12 | B12 | 9  | A11 | 4   |
| C | 13 | B13 | 12 | A12 | 9   |
| C | 10 | B14 | 9  | A13 | 4   |
| C | 12 | B15 | 9  | A14 | 4   |
| C | 16 | B16 | 12 | A15 | 9   |
| N | 17 | B17 | 16 | A16 | 12  |
| H | 16 | B18 | 12 | A17 | 9   |
| H | 17 | B19 | 16 | A18 | 12  |
| H | 18 | B20 | 17 | A19 | 16  |
| O | 14 | B21 | 13 | A20 | 12  |
| H | 15 | B22 | 10 | A21 | 9   |
| N | 1  | B23 | 4  | A22 | 9   |
| C | 24 | B24 | 1  | A23 | 4   |
| C | 25 | B25 | 24 | A24 | 1   |
| C | 26 | B26 | 25 | A25 | 24  |
| C | 27 | B27 | 26 | A26 | 25  |
| C | 24 | B28 | 1  | A27 | 4   |
| H | 29 | B29 | 24 | A28 | 1   |
| H | 28 | B30 | 27 | A29 | 26  |
| H | 27 | B31 | 26 | A30 | 25  |
| H | 26 | B32 | 25 | A31 | 24  |
| H | 25 | B33 | 24 | A32 | 1   |
| C | 11 | B34 | 10 | A33 | 9   |
|   |    |     |    |     | D1  |
|   |    |     |    |     | D2  |
|   |    |     |    |     | D3  |
|   |    |     |    |     | D4  |
|   |    |     |    |     | D5  |
|   |    |     |    |     | D6  |
|   |    |     |    |     | D7  |
|   |    |     |    |     | D8  |
|   |    |     |    |     | D9  |
|   |    |     |    |     | D10 |
|   |    |     |    |     | D11 |
|   |    |     |    |     | D12 |
|   |    |     |    |     | D13 |
|   |    |     |    |     | D14 |
|   |    |     |    |     | D15 |
|   |    |     |    |     | D16 |
|   |    |     |    |     | D17 |
|   |    |     |    |     | D18 |
|   |    |     |    |     | D19 |
|   |    |     |    |     | D20 |
|   |    |     |    |     | D21 |
|   |    |     |    |     | D22 |
|   |    |     |    |     | D23 |
|   |    |     |    |     | D24 |
|   |    |     |    |     | D25 |
|   |    |     |    |     | D26 |
|   |    |     |    |     | D27 |
|   |    |     |    |     | D28 |
|   |    |     |    |     | D29 |
|   |    |     |    |     | D30 |
|   |    |     |    |     | D31 |
|   |    |     |    |     | D32 |

|   |    |     |    |     |    |     |
|---|----|-----|----|-----|----|-----|
| O | 35 | B35 | 11 | A34 | 10 | D33 |
| O | 35 | B36 | 11 | A35 | 10 | D34 |
| C | 37 | B37 | 35 | A36 | 11 | D35 |
| C | 38 | B38 | 37 | A37 | 35 | D36 |
| C | 38 | B39 | 37 | A38 | 35 | D37 |
| C | 38 | B40 | 37 | A39 | 35 | D38 |
| H | 39 | B41 | 38 | A40 | 37 | D39 |
| H | 39 | B42 | 38 | A41 | 37 | D40 |
| H | 39 | B43 | 38 | A42 | 37 | D41 |
| H | 40 | B44 | 38 | A43 | 37 | D42 |
| H | 40 | B45 | 38 | A44 | 37 | D43 |
| H | 40 | B46 | 38 | A45 | 37 | D44 |
| H | 41 | B47 | 38 | A46 | 37 | D45 |
| H | 41 | B48 | 38 | A47 | 37 | D46 |
| H | 41 | B49 | 38 | A48 | 37 | D47 |

|     |            |
|-----|------------|
| B1  | 1.08629726 |
| B2  | 1.08553637 |
| B3  | 1.48783562 |
| B4  | 1.09445253 |
| B5  | 1.52373596 |
| B6  | 1.09221779 |
| B7  | 1.09781641 |
| B8  | 1.48539740 |
| B9  | 1.42880422 |
| B10 | 1.41811619 |
| B11 | 1.42385043 |
| B12 | 1.39550301 |
| B13 | 1.45114359 |
| B14 | 1.37226142 |
| B15 | 1.42696435 |
| B16 | 1.38085420 |
| B17 | 1.36198457 |
| B18 | 1.08279667 |
| B19 | 1.08131643 |
| B20 | 1.00858369 |
| B21 | 1.24197104 |
| B22 | 1.08136236 |
| B23 | 1.89786789 |
| B24 | 1.34178239 |
| B25 | 1.38535429 |
| B26 | 1.39418178 |
| B27 | 1.39313435 |
| B28 | 1.34170169 |
| B29 | 1.08773922 |
| B30 | 1.08544745 |
| B31 | 1.08560216 |
| B32 | 1.08540678 |
| B33 | 1.08775893 |
| B34 | 1.36873384 |
| B35 | 1.21359463 |
| B36 | 1.35356472 |
| B37 | 1.45625257 |
| B38 | 1.52368436 |
| B39 | 1.52455766 |
| B40 | 1.52470386 |
| B41 | 1.09456315 |
| B42 | 1.09525960 |
| B43 | 1.09477450 |
| B44 | 1.09540709 |
| B45 | 1.09536508 |
| B46 | 1.09101257 |
| B47 | 1.09541707 |
| B48 | 1.09104678 |

|     |               |
|-----|---------------|
| B49 | 1.09584235    |
| A1  | 115.08400127  |
| A2  | 116.48009021  |
| A3  | 114.90832320  |
| A4  | 113.75885649  |
| A5  | 113.71336023  |
| A6  | 110.31539077  |
| A7  | 89.34083203   |
| A8  | 109.55002526  |
| A9  | 107.16379396  |
| A10 | 132.14165374  |
| A11 | 116.69620990  |
| A12 | 126.82656724  |
| A13 | 124.39473033  |
| A14 | 136.56603776  |
| A15 | 106.77907127  |
| A16 | 108.82065317  |
| A17 | 127.83659869  |
| A18 | 129.92576259  |
| A19 | 128.36906232  |
| A20 | 121.27274192  |
| A21 | 121.56505139  |
| A22 | 111.32432247  |
| A23 | 117.72593754  |
| A24 | 122.38979664  |
| A25 | 118.89451059  |
| A26 | 118.61538170  |
| A27 | 116.11429123  |
| A28 | 115.82614903  |
| A29 | 121.31892818  |
| A30 | 120.68852316  |
| A31 | 119.77715326  |
| A32 | 115.85367870  |
| A33 | 125.79589676  |
| A34 | 125.15976134  |
| A35 | 109.27509246  |
| A36 | 120.10936842  |
| A37 | 102.63645730  |
| A38 | 110.26843268  |
| A39 | 110.36412398  |
| A40 | 110.09216489  |
| A41 | 110.69751498  |
| A42 | 110.61216003  |
| A43 | 109.55136619  |
| A44 | 110.21689775  |
| A45 | 111.01638950  |
| A46 | 109.56554066  |
| A47 | 111.00637690  |
| A48 | 110.23676763  |
| D1  | -141.11007692 |
| D2  | -53.49938966  |
| D3  | 172.35984937  |
| D4  | 48.29825873   |
| D5  | 170.03117498  |
| D6  | -104.58892760 |
| D7  | 96.64858632   |
| D8  | 4.26269145    |
| D9  | -81.34529615  |
| D10 | 176.19684074  |
| D11 | 0.47070910    |
| D12 | -176.68387815 |
| D13 | -3.87879289   |
| D14 | -179.82929173 |
| D15 | -0.05552128   |

|     |               |
|-----|---------------|
| D16 | -0.75105158   |
| D17 | 179.50688466  |
| D18 | 178.98155390  |
| D19 | -179.99736672 |
| D20 | -179.23996802 |
| D21 | 177.23557934  |
| D22 | 81.75091023   |
| D23 | -149.55137916 |
| D24 | 0.69814726    |
| D25 | -0.45229148   |
| D26 | -68.01786930  |
| D27 | -30.73276832  |
| D28 | -179.31223698 |
| D29 | 179.43944346  |
| D30 | -178.93717569 |
| D31 | 30.73598752   |
| D32 | -177.97820330 |
| D33 | 6.75910368    |
| D34 | -173.84762017 |
| D35 | 179.22980311  |
| D36 | -179.59593198 |
| D37 | -61.92159168  |
| D38 | 62.58408206   |
| D39 | 179.38508483  |
| D40 | -60.76539960  |
| D41 | 59.48241797   |
| D42 | -173.37269306 |
| D43 | -54.51507578  |
| D44 | 66.32333944   |
| D45 | 172.95852326  |
| D46 | -66.65031178  |
| D47 | 54.17071730   |

Number of imaginary frequency = 1 (eigenvalue=-560.6820)

|                                              |                             |
|----------------------------------------------|-----------------------------|
| Zero-point correction=                       | 0.412647 (Hartree/Particle) |
| Thermal correction to Energy=                | 0.436801                    |
| Thermal correction to Enthalpy=              | 0.437746                    |
| Thermal correction to Gibbs Free Energy=     | 0.357010                    |
| Sum of electronic and zero-point Energies=   | -1202.172838                |
| Sum of electronic and thermal Energies=      | -1202.148683                |
| Sum of electronic and thermal Enthalpies=    | -1202.147739                |
| Sum of electronic and thermal Free Energies= | -1202.228475                |

**Structure: Transition State of N-Boc-CPI (4) with Pyridine (1 water explicit molecule)**

|   |    |     |    |     |     |
|---|----|-----|----|-----|-----|
| C |    |     |    |     |     |
| N | 1  | B1  |    |     |     |
| C | 2  | B2  | 1  | A1  |     |
| C | 3  | B3  | 2  | A2  | 1   |
| C | 4  | B4  | 3  | A3  | 2   |
| C | 1  | B5  | 2  | A4  | 3   |
| C | 2  | B6  | 1  | A5  | 6   |
| C | 7  | B7  | 2  | A6  | 1   |
| C | 8  | B8  | 7  | A7  | 2   |
| N | 9  | B9  | 8  | A8  | 7   |
| C | 10 | B10 | 9  | A9  | 8   |
| C | 11 | B11 | 10 | A10 | 9   |
| C | 11 | B12 | 10 | A11 | 9   |
| C | 13 | B13 | 11 | A12 | 10  |
| C | 14 | B14 | 13 | A13 | 11  |
| C | 15 | B15 | 14 | A14 | 13  |
| N | 15 | B16 | 14 | A15 | 13  |
|   |    |     |    |     | D1  |
|   |    |     |    |     | D2  |
|   |    |     |    |     | D3  |
|   |    |     |    |     | D4  |
|   |    |     |    |     | D5  |
|   |    |     |    |     | D6  |
|   |    |     |    |     | D7  |
|   |    |     |    |     | D8  |
|   |    |     |    |     | D9  |
|   |    |     |    |     | D10 |
|   |    |     |    |     | D11 |
|   |    |     |    |     | D12 |
|   |    |     |    |     | D13 |
|   |    |     |    |     | D14 |

|   |    |     |    |     |    |     |
|---|----|-----|----|-----|----|-----|
| C | 17 | B17 | 15 | A16 | 14 | D15 |
| C | 18 | B18 | 17 | A17 | 15 | D16 |
| C | 10 | B19 | 9  | A18 | 8  | D17 |
| O | 20 | B20 | 10 | A19 | 9  | D18 |
| C | 21 | B21 | 20 | A20 | 10 | D19 |
| C | 22 | B22 | 21 | A21 | 20 | D20 |
| O | 14 | B23 | 13 | A22 | 11 | D21 |
| O | 20 | B24 | 10 | A23 | 9  | D22 |
| C | 22 | B25 | 21 | A24 | 20 | D23 |
| C | 22 | B26 | 21 | A25 | 20 | D24 |
| O | 24 | B27 | 14 | A26 | 13 | D25 |
| H | 7  | B28 | 2  | A27 | 1  | D26 |
| H | 7  | B29 | 2  | A28 | 1  | D27 |
| H | 8  | B30 | 7  | A29 | 2  | D28 |
| H | 9  | B31 | 8  | A30 | 7  | D29 |
| H | 9  | B32 | 8  | A31 | 7  | D30 |
| H | 19 | B33 | 18 | A32 | 17 | D31 |
| H | 18 | B34 | 17 | A33 | 15 | D32 |
| H | 17 | B35 | 15 | A34 | 14 | D33 |
| H | 13 | B36 | 11 | A35 | 10 | D34 |
| H | 1  | B37 | 2  | A36 | 3  | D35 |
| H | 6  | B38 | 1  | A37 | 2  | D36 |
| H | 5  | B39 | 4  | A38 | 3  | D37 |
| H | 4  | B40 | 3  | A39 | 2  | D38 |
| H | 3  | B41 | 2  | A40 | 1  | D39 |
| H | 26 | B42 | 22 | A41 | 21 | D40 |
| H | 26 | B43 | 22 | A42 | 21 | D41 |
| H | 26 | B44 | 22 | A43 | 21 | D42 |
| H | 27 | B45 | 22 | A44 | 21 | D43 |
| H | 27 | B46 | 22 | A45 | 21 | D44 |
| H | 27 | B47 | 22 | A46 | 21 | D45 |
| H | 23 | B48 | 22 | A47 | 21 | D46 |
| H | 23 | B49 | 22 | A48 | 21 | D47 |
| H | 23 | B50 | 22 | A49 | 21 | D48 |
| H | 28 | B51 | 24 | A50 | 14 | D49 |
| H | 28 | B52 | 24 | A51 | 14 | D50 |

|     |            |
|-----|------------|
| B1  | 1.33906226 |
| B2  | 1.33921250 |
| B3  | 1.38619781 |
| B4  | 1.39350461 |
| B5  | 1.38659354 |
| B6  | 1.90870948 |
| B7  | 1.48528601 |
| B8  | 1.52380999 |
| B9  | 1.46521771 |
| B10 | 1.41679403 |
| B11 | 1.42323862 |
| B12 | 1.37306884 |
| B13 | 1.44537830 |
| B14 | 1.44706605 |
| B15 | 1.40366117 |
| B16 | 1.36983082 |
| B17 | 1.35607502 |
| B18 | 1.38235366 |
| B19 | 1.36909027 |
| B20 | 1.35307317 |
| B21 | 1.45663065 |
| B22 | 1.52469699 |
| B23 | 1.25749806 |
| B24 | 1.21346844 |
| B25 | 1.52346383 |
| B26 | 1.52449820 |
| B27 | 2.66800990 |

|     |              |
|-----|--------------|
| B28 | 1.08614663   |
| B29 | 1.08546873   |
| B30 | 1.09373382   |
| B31 | 1.09237977   |
| B32 | 1.09780510   |
| B33 | 1.08276560   |
| B34 | 1.08179217   |
| B35 | 1.03165335   |
| B36 | 1.08123372   |
| B37 | 1.08774917   |
| B38 | 1.08532895   |
| B39 | 1.08571042   |
| B40 | 1.08529432   |
| B41 | 1.08780681   |
| B42 | 1.09453910   |
| B43 | 1.09518622   |
| B44 | 1.09473794   |
| B45 | 1.09541766   |
| B46 | 1.09540522   |
| B47 | 1.09105844   |
| B48 | 1.09543996   |
| B49 | 1.09108245   |
| B50 | 1.09591243   |
| B51 | 0.99852892   |
| B52 | 0.96553626   |
| A1  | 119.18942425 |
| A2  | 122.22385868 |
| A3  | 118.78825752 |
| A4  | 122.22470653 |
| A5  | 116.95465792 |
| A6  | 111.51482781 |
| A7  | 113.82882051 |
| A8  | 103.45373497 |
| A9  | 110.12170677 |
| A10 | 107.50233657 |
| A11 | 128.77201486 |
| A12 | 120.32738810 |
| A13 | 114.83579097 |
| A14 | 125.04286811 |
| A15 | 127.10774857 |
| A16 | 109.18894396 |
| A17 | 109.62696633 |
| A18 | 123.27058915 |
| A19 | 109.27710155 |
| A20 | 120.09638576 |
| A21 | 110.28405012 |
| A22 | 121.72555518 |
| A23 | 125.05080301 |
| A24 | 102.63848911 |
| A25 | 110.30048136 |
| A26 | 115.86008300 |
| A27 | 96.51401922  |
| A28 | 96.23060397  |
| A29 | 115.29272408 |
| A30 | 113.71118795 |
| A31 | 110.30498662 |
| A32 | 125.76912594 |
| A33 | 120.76831042 |
| A34 | 122.73765696 |
| A35 | 121.73260011 |
| A36 | 115.91054691 |
| A37 | 119.85792338 |
| A38 | 120.61024718 |
| A39 | 119.85249571 |

|     |               |
|-----|---------------|
| A40 | 115.95141185  |
| A41 | 110.07795604  |
| A42 | 110.64659927  |
| A43 | 110.63027726  |
| A44 | 109.51995848  |
| A45 | 110.21410894  |
| A46 | 111.10247064  |
| A47 | 109.61083328  |
| A48 | 111.01225888  |
| A49 | 110.23435137  |
| A50 | 9.54856010    |
| A51 | 100.84482225  |
| D1  | -0.73694583   |
| D2  | 0.67392545    |
| D3  | 0.47227110    |
| D4  | 153.90020479  |
| D5  | -70.56289892  |
| D6  | -78.54557931  |
| D7  | -70.75564341  |
| D8  | -22.59642346  |
| D9  | 11.79508245   |
| D10 | -167.34750767 |
| D11 | 178.94476133  |
| D12 | -1.26143538   |
| D13 | 1.13551581    |
| D14 | -178.57530168 |
| D15 | 179.92662005  |
| D16 | -0.12818788   |
| D17 | 167.11268126  |
| D18 | -4.79540002   |
| D19 | 179.29793911  |
| D20 | 62.84841970   |
| D21 | 179.47080457  |
| D22 | 175.79532291  |
| D23 | -179.35320041 |
| D24 | -61.64890982  |
| D25 | 177.85353533  |
| D26 | 167.81269277  |
| D27 | 51.34096432   |
| D28 | 56.33963077   |
| D29 | 49.34726932   |
| D30 | 171.10730260  |
| D31 | -178.94832220 |
| D32 | -179.73009705 |
| D33 | 0.44877081    |
| D34 | -0.52889477   |
| D35 | -179.98153198 |
| D36 | 179.41086759  |
| D37 | 179.53543714  |
| D38 | -179.02194005 |
| D39 | 179.58335874  |
| D40 | 179.83812634  |
| D41 | -60.33736467  |
| D42 | 59.93078711   |
| D43 | -172.98790395 |
| D44 | -54.17226372  |
| D45 | 66.67445058   |
| D46 | 173.24302828  |
| D47 | -66.36952458  |
| D48 | 54.48972272   |
| D49 | 150.14959429  |
| D50 | -105.76257941 |

Number of immaginary frequency = 1 (eigenvalue=-543.5000)



|                                              |                             |
|----------------------------------------------|-----------------------------|
| Zero-point correction=                       | 0.438739 (Hartree/Particle) |
| Thermal correction to Energy=                | 0.465197                    |
| Thermal correction to Enthalpy=              | 0.466141                    |
| Thermal correction to Gibbs Free Energy=     | 0.380555                    |
| Sum of electronic and zero-point Energies=   | -1278.504185                |
| Sum of electronic and thermal Energies=      | -1278.477727                |
| Sum of electronic and thermal Enthalpies=    | -1278.476783                |
| Sum of electronic and thermal Free Energies= | -1278.562369                |

**Structure: Transition State of N-Boc-CPI (5) with Pyridine (2 water explicit molecules)**

|   |    |     |    |     |    |     |
|---|----|-----|----|-----|----|-----|
| C |    |     |    |     |    |     |
| N | 1  | B1  |    |     |    |     |
| C | 2  | B2  | 1  | A1  |    |     |
| C | 3  | B3  | 2  | A2  | 1  | D1  |
| C | 4  | B4  | 3  | A3  | 2  | D2  |
| C | 1  | B5  | 2  | A4  | 3  | D3  |
| C | 2  | B6  | 1  | A5  | 6  | D4  |
| C | 7  | B7  | 2  | A6  | 1  | D5  |
| C | 8  | B8  | 7  | A7  | 2  | D6  |
| N | 9  | B9  | 8  | A8  | 7  | D7  |
| C | 10 | B10 | 9  | A9  | 8  | D8  |
| C | 11 | B11 | 10 | A10 | 9  | D9  |
| C | 11 | B12 | 10 | A11 | 9  | D10 |
| C | 13 | B13 | 11 | A12 | 10 | D11 |
| C | 14 | B14 | 13 | A13 | 11 | D12 |
| C | 15 | B15 | 14 | A14 | 13 | D13 |
| N | 15 | B16 | 14 | A15 | 13 | D14 |
| C | 17 | B17 | 15 | A16 | 14 | D15 |
| C | 18 | B18 | 17 | A17 | 15 | D16 |
| C | 10 | B19 | 9  | A18 | 8  | D17 |
| O | 20 | B20 | 10 | A19 | 9  | D18 |
| C | 21 | B21 | 20 | A20 | 10 | D19 |
| C | 22 | B22 | 21 | A21 | 20 | D20 |
| O | 14 | B23 | 13 | A22 | 11 | D21 |
| O | 20 | B24 | 10 | A23 | 9  | D22 |
| C | 22 | B25 | 21 | A24 | 20 | D23 |
| C | 22 | B26 | 21 | A25 | 20 | D24 |
| O | 24 | B27 | 14 | A26 | 13 | D25 |
| H | 7  | B28 | 2  | A27 | 1  | D26 |
| H | 7  | B29 | 2  | A28 | 1  | D27 |
| H | 8  | B30 | 7  | A29 | 2  | D28 |
| H | 9  | B31 | 8  | A30 | 7  | D29 |
| H | 9  | B32 | 8  | A31 | 7  | D30 |
| H | 19 | B33 | 18 | A32 | 17 | D31 |
| H | 18 | B34 | 17 | A33 | 15 | D32 |
| H | 17 | B35 | 15 | A34 | 14 | D33 |
| H | 13 | B36 | 11 | A35 | 10 | D34 |
| H | 1  | B37 | 2  | A36 | 3  | D35 |
| H | 6  | B38 | 1  | A37 | 2  | D36 |
| H | 5  | B39 | 4  | A38 | 3  | D37 |
| H | 4  | B40 | 3  | A39 | 2  | D38 |
| H | 3  | B41 | 2  | A40 | 1  | D39 |
| H | 26 | B42 | 22 | A41 | 21 | D40 |
| H | 26 | B43 | 22 | A42 | 21 | D41 |
| H | 26 | B44 | 22 | A43 | 21 | D42 |
| H | 27 | B45 | 22 | A44 | 21 | D43 |
| H | 27 | B46 | 22 | A45 | 21 | D44 |
| H | 27 | B47 | 22 | A46 | 21 | D45 |
| H | 23 | B48 | 22 | A47 | 21 | D46 |
| H | 23 | B49 | 22 | A48 | 21 | D47 |
| H | 23 | B50 | 22 | A49 | 21 | D48 |
| H | 28 | B51 | 24 | A50 | 14 | D49 |

|   |    |     |    |     |    |     |
|---|----|-----|----|-----|----|-----|
| H | 28 | B52 | 24 | A51 | 14 | D50 |
| H | 24 | B53 | 14 | A52 | 13 | D51 |
| O | 24 | B54 | 14 | A53 | 13 | D52 |
| H | 55 | B55 | 24 | A54 | 14 | D53 |

|     |              |
|-----|--------------|
| B1  | 1.33672501   |
| B2  | 1.33696670   |
| B3  | 1.38702612   |
| B4  | 1.39284191   |
| B5  | 1.38719690   |
| B6  | 1.91909863   |
| B7  | 1.48228696   |
| B8  | 1.52399863   |
| B9  | 1.46418183   |
| B10 | 1.41495996   |
| B11 | 1.42098740   |
| B12 | 1.37540361   |
| B13 | 1.43839438   |
| B14 | 1.44005805   |
| B15 | 1.40504681   |
| B16 | 1.37071031   |
| B17 | 1.35548244   |
| B18 | 1.38238118   |
| B19 | 1.37066382   |
| B20 | 1.35251182   |
| B21 | 1.45790784   |
| B22 | 1.52455789   |
| B23 | 1.26931457   |
| B24 | 1.21227407   |
| B25 | 1.52346591   |
| B26 | 1.52423316   |
| B27 | 2.68271641   |
| B28 | 1.08603262   |
| B29 | 1.08554696   |
| B30 | 1.09304069   |
| B31 | 1.09210776   |
| B32 | 1.09786860   |
| B33 | 1.08263187   |
| B34 | 1.08179418   |
| B35 | 1.03139116   |
| B36 | 1.08314456   |
| B37 | 1.08772966   |
| B38 | 1.08522603   |
| B39 | 1.08581563   |
| B40 | 1.08519780   |
| B41 | 1.08785978   |
| B42 | 1.09452400   |
| B43 | 1.09539294   |
| B44 | 1.09471016   |
| B45 | 1.09537779   |
| B46 | 1.09532610   |
| B47 | 1.09117110   |
| B48 | 1.09538363   |
| B49 | 1.09098967   |
| B50 | 1.09601353   |
| B51 | 0.99456530   |
| B52 | 0.96557882   |
| B53 | 1.82154528   |
| B54 | 2.79298502   |
| B55 | 0.96447908   |
| A1  | 119.53902871 |
| A2  | 122.05719032 |
| A3  | 118.69783546 |
| A4  | 122.08014371 |

|     |               |
|-----|---------------|
| A5  | 117.90954861  |
| A6  | 111.52335431  |
| A7  | 114.00452672  |
| A8  | 103.30732722  |
| A9  | 110.00703695  |
| A10 | 107.60547860  |
| A11 | 128.60541028  |
| A12 | 119.84106898  |
| A13 | 115.57503216  |
| A14 | 124.79495369  |
| A15 | 127.34482503  |
| A16 | 109.10660326  |
| A17 | 109.73718483  |
| A18 | 123.73955364  |
| A19 | 109.29538664  |
| A20 | 119.96850249  |
| A21 | 110.31910115  |
| A22 | 121.97858627  |
| A23 | 124.85544496  |
| A24 | 102.58218496  |
| A25 | 110.21889918  |
| A26 | 116.47977146  |
| A27 | 95.83665321   |
| A28 | 95.92710606   |
| A29 | 115.54321284  |
| A30 | 113.78942468  |
| A31 | 110.23245115  |
| A32 | 125.74676255  |
| A33 | 120.72316725  |
| A34 | 122.96529164  |
| A35 | 122.17536489  |
| A36 | 116.00154459  |
| A37 | 119.94079043  |
| A38 | 120.52989659  |
| A39 | 119.91846247  |
| A40 | 116.04696814  |
| A41 | 110.09185066  |
| A42 | 110.70158815  |
| A43 | 110.62506642  |
| A44 | 109.51771844  |
| A45 | 110.24326622  |
| A46 | 111.08186800  |
| A47 | 109.52267420  |
| A48 | 110.99272642  |
| A49 | 110.29918522  |
| A50 | 10.30845095   |
| A51 | 101.51856668  |
| A52 | 113.98028316  |
| A53 | 111.03899320  |
| A54 | 98.10026972   |
| D1  | -0.81579468   |
| D2  | 0.65327568    |
| D3  | 0.58821401    |
| D4  | 158.30106122  |
| D5  | -73.74870681  |
| D6  | -78.25214407  |
| D7  | -69.57992713  |
| D8  | -23.80986595  |
| D9  | 13.15027868   |
| D10 | -165.44528953 |
| D11 | 178.95966949  |
| D12 | -1.53256192   |
| D13 | 0.92433907    |
| D14 | -178.43453558 |

|     |               |
|-----|---------------|
| D15 | 179.58206098  |
| D16 | -0.08024963   |
| D17 | 163.50523717  |
| D18 | -2.49550120   |
| D19 | 178.28517877  |
| D20 | 63.10755897   |
| D21 | 179.06937105  |
| D22 | 178.23349637  |
| D23 | -179.08037607 |
| D24 | -61.33226086  |
| D25 | 177.91919622  |
| D26 | 164.71381848  |
| D27 | 48.23729091   |
| D28 | 57.45003068   |
| D29 | 50.51586174   |
| D30 | 172.36681139  |
| D31 | -178.90753875 |
| D32 | -179.67033614 |
| D33 | 0.39136835    |
| D34 | 0.60833831    |
| D35 | -179.82901330 |
| D36 | 179.48187662  |
| D37 | 179.60230873  |
| D38 | -179.16390836 |
| D39 | 179.44584031  |
| D40 | 179.76539416  |
| D41 | -60.39447581  |
| D42 | 59.87187244   |
| D43 | -173.50603665 |
| D44 | -54.66977645  |
| D45 | 66.20024468   |
| D46 | 172.98826219  |
| D47 | -66.69542593  |
| D48 | 54.24326272   |
| D49 | 153.16946723  |
| D50 | -106.53811367 |
| D51 | 4.31470546    |
| D52 | 2.33521328    |
| D53 | -76.40323019  |

Number of imaginary frequency = 1 (eigenvalue=-518.2779)

|                                              |                             |
|----------------------------------------------|-----------------------------|
| Zero-point correction=                       | 0.463654 (Hartree/Particle) |
| Thermal correction to Energy=                | 0.493464                    |
| Thermal correction to Enthalpy=              | 0.494409                    |
| Thermal correction to Gibbs Free Energy=     | 0.399701                    |
| Sum of electronic and zero-point Energies=   | -1354.823081                |
| Sum of electronic and thermal Energies=      | -1354.793270                |
| Sum of electronic and thermal Enthalpies=    | -1354.792326                |
| Sum of electronic and thermal Free Energies= | -1354.887034                |

**Structure: Transition State of CPI (3) with Pyridine**

|   |   |     |   |    |    |
|---|---|-----|---|----|----|
| C |   |     |   |    |    |
| C | 1 | B1  |   |    |    |
| N | 2 | B2  | 1 | A1 |    |
| C | 3 | B3  | 2 | A2 | 1  |
| C | 2 | B4  | 1 | A3 | 3  |
| O | 5 | B5  | 2 | A4 | 1  |
| N | 5 | B6  | 2 | A5 | 1  |
| C | 7 | B7  | 5 | A6 | 2  |
| C | 8 | B8  | 7 | A7 | 5  |
| C | 9 | B9  | 8 | A8 | 7  |
| C | 7 | B10 | 5 | A9 | 2  |
|   |   |     |   |    | D1 |
|   |   |     |   |    | D2 |
|   |   |     |   |    | D3 |
|   |   |     |   |    | D4 |
|   |   |     |   |    | D5 |
|   |   |     |   |    | D6 |
|   |   |     |   |    | D7 |
|   |   |     |   |    | D8 |

|   |    |     |    |     |    |     |
|---|----|-----|----|-----|----|-----|
| C | 8  | B11 | 7  | A10 | 5  | D9  |
| C | 12 | B12 | 8  | A11 | 7  | D10 |
| C | 13 | B13 | 12 | A12 | 8  | D11 |
| C | 14 | B14 | 13 | A13 | 12 | D12 |
| N | 14 | B15 | 13 | A14 | 12 | D13 |
| C | 16 | B16 | 14 | A15 | 13 | D14 |
| C | 17 | B17 | 16 | A16 | 14 | D15 |
| O | 13 | B18 | 12 | A17 | 8  | D16 |
| C | 10 | B19 | 9  | A18 | 8  | D17 |
| N | 20 | B20 | 10 | A19 | 9  | D18 |
| C | 21 | B21 | 20 | A20 | 10 | D19 |
| C | 22 | B22 | 21 | A21 | 20 | D20 |
| C | 23 | B23 | 22 | A22 | 21 | D21 |
| C | 24 | B24 | 23 | A23 | 22 | D22 |
| C | 21 | B25 | 20 | A24 | 10 | D23 |
| H | 20 | B26 | 10 | A25 | 9  | D24 |
| H | 20 | B27 | 10 | A26 | 9  | D25 |
| H | 10 | B28 | 9  | A27 | 8  | D26 |
| H | 12 | B29 | 8  | A28 | 7  | D27 |
| H | 11 | B30 | 7  | A29 | 5  | D28 |
| H | 11 | B31 | 7  | A30 | 5  | D29 |
| H | 22 | B32 | 21 | A31 | 20 | D30 |
| H | 23 | B33 | 22 | A32 | 21 | D31 |
| H | 24 | B34 | 23 | A33 | 22 | D32 |
| H | 25 | B35 | 24 | A34 | 23 | D33 |
| H | 26 | B36 | 21 | A35 | 20 | D34 |
| H | 16 | B37 | 14 | A36 | 13 | D35 |
| H | 18 | B38 | 17 | A37 | 16 | D36 |
| H | 17 | B39 | 16 | A38 | 14 | D37 |
| H | 3  | B40 | 2  | A39 | 1  | D38 |
| H | 1  | B41 | 2  | A40 | 3  | D39 |
| C | 4  | B42 | 3  | A41 | 2  | D40 |
| C | 43 | B43 | 4  | A42 | 3  | D41 |
| C | 44 | B44 | 43 | A43 | 4  | D42 |
| C | 45 | B45 | 44 | A44 | 43 | D43 |
| C | 46 | B46 | 45 | A45 | 44 | D44 |
| H | 43 | B47 | 4  | A46 | 3  | D45 |
| H | 44 | B48 | 43 | A47 | 4  | D46 |
| H | 45 | B49 | 44 | A48 | 43 | D47 |
| H | 46 | B50 | 45 | A49 | 44 | D48 |

|     |            |
|-----|------------|
| B1  | 1.38246815 |
| B2  | 1.37478696 |
| B3  | 1.36232977 |
| B4  | 1.48591481 |
| B5  | 1.22911038 |
| B6  | 1.36617245 |
| B7  | 1.42388849 |
| B8  | 1.42812770 |
| B9  | 1.48441019 |
| B10 | 1.46354646 |
| B11 | 1.37253923 |
| B12 | 1.45382335 |
| B13 | 1.45037731 |
| B14 | 1.39605691 |
| B15 | 1.36385729 |
| B16 | 1.36202162 |
| B17 | 1.38060214 |
| B18 | 1.24171578 |
| B19 | 1.48679433 |
| B20 | 1.90552600 |
| B21 | 1.34031701 |
| B22 | 1.38637853 |
| B23 | 1.39297774 |

|     |              |
|-----|--------------|
| B24 | 1.39381481   |
| B25 | 1.34081412   |
| B26 | 1.08556774   |
| B27 | 1.08616582   |
| B28 | 1.09401742   |
| B29 | 1.08081098   |
| B30 | 1.09822795   |
| B31 | 1.09245890   |
| B32 | 1.08773541   |
| B33 | 1.08540303   |
| B34 | 1.08566479   |
| B35 | 1.08528732   |
| B36 | 1.08783637   |
| B37 | 1.00863426   |
| B38 | 1.08273459   |
| B39 | 1.08129989   |
| B40 | 1.01073167   |
| B41 | 1.07956550   |
| B42 | 1.39886565   |
| B43 | 1.38336135   |
| B44 | 1.41011198   |
| B45 | 1.38212008   |
| B46 | 1.40526061   |
| B47 | 1.08639387   |
| B48 | 1.08653678   |
| B49 | 1.08646126   |
| B50 | 1.08712878   |
| A1  | 108.52033408 |
| A2  | 110.29973142 |
| A3  | 138.05872998 |
| A4  | 117.56527844 |
| A5  | 119.55581376 |
| A6  | 125.11231130 |
| A7  | 107.43463572 |
| A8  | 109.43980591 |
| A9  | 125.33064883 |
| A10 | 128.18531469 |
| A11 | 120.02057629 |
| A12 | 113.73292146 |
| A13 | 126.86080056 |
| A14 | 125.08638744 |
| A15 | 109.59142642 |
| A16 | 108.85599928 |
| A17 | 124.88028039 |
| A18 | 89.43018561  |
| A19 | 111.52843697 |
| A20 | 116.77524874 |
| A21 | 122.29193326 |
| A22 | 118.84115270 |
| A23 | 118.72568671 |
| A24 | 117.76434389 |
| A25 | 116.48714273 |
| A26 | 116.28711254 |
| A27 | 118.51808147 |
| A28 | 121.71574938 |
| A29 | 110.64410832 |
| A30 | 110.56039675 |
| A31 | 115.89973519 |
| A32 | 119.82539835 |
| A33 | 120.64796269 |
| A34 | 121.43172148 |
| A35 | 116.00982107 |
| A36 | 122.03631044 |
| A37 | 125.38839322 |

|     |               |
|-----|---------------|
| A38 | 121.24106030  |
| A39 | 120.16210754  |
| A40 | 127.20608140  |
| A41 | 130.73098937  |
| A42 | 117.35568223  |
| A43 | 121.50106532  |
| A44 | 121.10991157  |
| A45 | 118.88534429  |
| A46 | 121.30282984  |
| A47 | 119.28130253  |
| A48 | 119.13816884  |
| A49 | 120.68565144  |
| D1  | 0.34395349    |
| D2  | 175.86798643  |
| D3  | -164.82909405 |
| D4  | 15.90735637   |
| D5  | -174.93487509 |
| D6  | -166.54497418 |
| D7  | 4.63222454    |
| D8  | 6.63993551    |
| D9  | 15.25023180   |
| D10 | 177.68698945  |
| D11 | -0.72398223   |
| D12 | 0.62509780    |
| D13 | -178.58865124 |
| D14 | 179.41835453  |
| D15 | -0.03795919   |
| D16 | -179.92365202 |
| D17 | 95.74486853   |
| D18 | 178.09743566  |
| D19 | -70.02414615  |
| D20 | 151.59306298  |
| D21 | -0.16159149   |
| D22 | 0.17322998    |
| D23 | 81.57015182   |
| D24 | 68.41394449   |
| D25 | -72.42868750  |
| D26 | -145.61039477 |
| D27 | -2.05456183   |
| D28 | -86.73825371  |
| D29 | 33.98348566   |
| D30 | -28.86099347  |
| D31 | 179.40878711  |
| D32 | -179.69152035 |
| D33 | 179.42047302  |
| D34 | 28.60705759   |
| D35 | 0.33726492    |
| D36 | -179.19149718 |
| D37 | -179.63480092 |
| D38 | 173.73135164  |
| D39 | -177.27765964 |
| D40 | 179.85630718  |
| D41 | 179.87254151  |
| D42 | -0.08746619   |
| D43 | 0.03094421    |
| D44 | 0.01752162    |
| D45 | -0.34352266   |
| D46 | 179.76642065  |
| D47 | 179.87072324  |
| D48 | 179.73449326  |

Number of imaginary frequency : 1 (eigenvalue=-548.8549)

Zero-point correction=

0.406306 (Hartree/Particle)

|                                              |              |
|----------------------------------------------|--------------|
| Thermal correction to Energy=                | 0.430376     |
| Thermal correction to Enthalpy=              | 0.431320     |
| Thermal correction to Gibbs Free Energy=     | 0.349621     |
| Sum of electronic and zero-point Energies=   | -1332.170826 |
| Sum of electronic and thermal Energies=      | -1332.146756 |
| Sum of electronic and thermal Enthalpies=    | -1332.145812 |
| Sum of electronic and thermal Free Energies= | -1332.227511 |

**Structure: Transition State of CPI (3) with Adenine**

|   |    |     |    |     |    |     |
|---|----|-----|----|-----|----|-----|
| N |    |     |    |     |    |     |
| C | 1  | B1  |    |     |    |     |
| C | 2  | B2  | 1  | A1  |    |     |
| N | 3  | B3  | 2  | A2  | 1  | D1  |
| C | 1  | B4  | 2  | A3  | 3  | D2  |
| C | 2  | B5  | 1  | A4  | 5  | D3  |
| N | 6  | B6  | 2  | A5  | 1  | D4  |
| C | 7  | B7  | 6  | A6  | 2  | D5  |
| N | 8  | B8  | 7  | A7  | 6  | D6  |
| N | 6  | B9  | 2  | A8  | 1  | D7  |
| C | 9  | B10 | 8  | A9  | 7  | D8  |
| C | 11 | B11 | 9  | A10 | 8  | D9  |
| C | 12 | B12 | 11 | A11 | 9  | D10 |
| C | 13 | B13 | 12 | A12 | 11 | D11 |
| N | 14 | B14 | 13 | A13 | 12 | D12 |
| C | 15 | B15 | 14 | A14 | 13 | D13 |
| C | 13 | B16 | 12 | A15 | 11 | D14 |
| C | 17 | B17 | 13 | A16 | 12 | D15 |
| C | 18 | B18 | 17 | A17 | 13 | D16 |
| C | 14 | B19 | 13 | A18 | 12 | D17 |
| C | 17 | B20 | 13 | A19 | 12 | D18 |
| C | 21 | B21 | 17 | A20 | 13 | D19 |
| N | 22 | B22 | 21 | A21 | 17 | D20 |
| C | 15 | B23 | 14 | A22 | 13 | D21 |
| O | 24 | B24 | 15 | A23 | 14 | D22 |
| O | 19 | B25 | 18 | A24 | 17 | D23 |
| C | 24 | B26 | 15 | A25 | 14 | D24 |
| N | 27 | B27 | 24 | A26 | 15 | D25 |
| C | 28 | B28 | 27 | A27 | 24 | D26 |
| C | 29 | B29 | 28 | A28 | 27 | D27 |
| C | 27 | B30 | 24 | A29 | 15 | D28 |
| C | 29 | B31 | 28 | A30 | 27 | D29 |
| C | 32 | B32 | 29 | A31 | 28 | D30 |
| C | 33 | B33 | 32 | A32 | 29 | D31 |
| C | 34 | B34 | 33 | A33 | 32 | D32 |
| H | 11 | B35 | 9  | A34 | 8  | D33 |
| H | 11 | B36 | 9  | A35 | 8  | D34 |
| H | 12 | B37 | 11 | A36 | 9  | D35 |
| H | 20 | B38 | 14 | A37 | 13 | D36 |
| H | 16 | B39 | 15 | A38 | 14 | D37 |
| H | 16 | B40 | 15 | A39 | 14 | D38 |
| H | 8  | B41 | 7  | A40 | 6  | D39 |
| H | 23 | B42 | 22 | A41 | 21 | D40 |
| H | 21 | B43 | 17 | A42 | 13 | D41 |
| H | 22 | B44 | 21 | A43 | 17 | D42 |
| H | 28 | B45 | 27 | A44 | 24 | D43 |
| H | 31 | B46 | 27 | A45 | 24 | D44 |
| H | 32 | B47 | 29 | A46 | 28 | D45 |
| H | 33 | B48 | 32 | A47 | 29 | D46 |
| H | 34 | B49 | 33 | A48 | 32 | D47 |
| H | 35 | B50 | 34 | A49 | 33 | D48 |
| H | 10 | B51 | 6  | A50 | 2  | D49 |
| H | 10 | B52 | 6  | A51 | 2  | D50 |
| H | 5  | B53 | 1  | A52 | 2  | D51 |



|     |              |
|-----|--------------|
| B1  | 1.37295904   |
| B2  | 1.39473357   |
| B3  | 1.36385500   |
| B4  | 1.30609696   |
| B5  | 1.40933684   |
| B6  | 1.34627711   |
| B7  | 1.32237428   |
| B8  | 1.33698717   |
| B9  | 1.33647140   |
| B10 | 1.89223209   |
| B11 | 1.48446901   |
| B12 | 1.49088298   |
| B13 | 1.42158606   |
| B14 | 1.43236618   |
| B15 | 1.46441408   |
| B16 | 1.42160073   |
| B17 | 1.39791359   |
| B18 | 1.44903550   |
| B19 | 1.37466451   |
| B20 | 1.42777474   |
| B21 | 1.38075474   |
| B22 | 1.36155977   |
| B23 | 1.36045521   |
| B24 | 1.22897374   |
| B25 | 1.24379886   |
| B26 | 1.49469878   |
| B27 | 1.37414378   |
| B28 | 1.36305407   |
| B29 | 1.42094719   |
| B30 | 1.38592028   |
| B31 | 1.39893305   |
| B32 | 1.38337167   |
| B33 | 1.41019035   |
| B34 | 1.38275400   |
| B35 | 1.08608759   |
| B36 | 1.08649487   |
| B37 | 1.09343857   |
| B38 | 1.08104538   |
| B39 | 1.09749571   |
| B40 | 1.08909872   |
| B41 | 1.08828813   |
| B42 | 1.00849630   |
| B43 | 1.08290604   |
| B44 | 1.08145914   |
| B45 | 1.01197834   |
| B46 | 1.08037670   |
| B47 | 1.08620272   |
| B48 | 1.08632011   |
| B49 | 1.08628446   |
| B50 | 1.08705711   |
| B51 | 1.00767200   |
| B52 | 1.00778901   |
| B53 | 1.08266192   |
| B54 | 1.01588693   |
| A1  | 111.35403021 |
| A2  | 104.79197579 |
| A3  | 103.87531998 |
| A4  | 131.65047642 |
| A5  | 119.03200900 |
| A6  | 118.49994182 |
| A7  | 127.89405645 |
| A8  | 122.14303093 |

|     |               |
|-----|---------------|
| A9  | 118.63599345  |
| A10 | 115.42999278  |
| A11 | 91.35000074   |
| A12 | 109.65899479  |
| A13 | 107.25000838  |
| A14 | 108.21597494  |
| A15 | 132.25387087  |
| A16 | 116.59501417  |
| A17 | 127.19401248  |
| A18 | 124.88937857  |
| A19 | 136.70744212  |
| A20 | 106.78802349  |
| A21 | 108.90199510  |
| A22 | 124.40999885  |
| A23 | 123.38398429  |
| A24 | 121.43466230  |
| A25 | 119.96097148  |
| A26 | 112.68696604  |
| A27 | 110.51900426  |
| A28 | 107.16100737  |
| A29 | 138.96255220  |
| A30 | 130.72407603  |
| A31 | 117.32201016  |
| A32 | 121.52800797  |
| A33 | 121.16097541  |
| A34 | 94.83401060   |
| A35 | 97.43032922   |
| A36 | 115.39191266  |
| A37 | 121.77398919  |
| A38 | 110.11697416  |
| A39 | 111.41896537  |
| A40 | 116.66554850  |
| A41 | 128.53500791  |
| A42 | 127.83004799  |
| A43 | 129.84695072  |
| A44 | 119.66951076  |
| A45 | 127.08485981  |
| A46 | 121.30702616  |
| A47 | 119.27802528  |
| A48 | 119.14004337  |
| A49 | 120.73698636  |
| A50 | 120.24500968  |
| A51 | 119.43398278  |
| A52 | 125.83817561  |
| A53 | 128.78998318  |
| D1  | -0.35698360   |
| D2  | -0.11245208   |
| D3  | 179.42126597  |
| D4  | -179.30761367 |
| D5  | -0.40603315   |
| D6  | 0.01504905    |
| D7  | 0.43938052    |
| D8  | 174.38812031  |
| D9  | -97.32905141  |
| D10 | 175.68499638  |
| D11 | 94.38897495   |
| D12 | 2.99101107    |
| D13 | 16.41697770   |
| D14 | -82.88700369  |
| D15 | 176.63760223  |
| D16 | 0.36197426    |
| D17 | -177.67567950 |
| D18 | -3.66972607   |
| D19 | -179.64307417 |

|     |               |
|-----|---------------|
| D20 | -0.02001294   |
| D21 | -154.58700847 |
| D22 | -4.28701107   |
| D23 | 179.62159025  |
| D24 | 172.38000967  |
| D25 | -162.87204746 |
| D26 | -178.77603551 |
| D27 | -0.16992303   |
| D28 | 18.85110434   |
| D29 | -179.35636720 |
| D30 | 179.07420053  |
| D31 | -0.07293485   |
| D32 | 0.16295134    |
| D33 | 24.24808042   |
| D34 | 139.33546908  |
| D35 | 53.46622916   |
| D36 | -179.80963831 |
| D37 | 89.03589038   |
| D38 | -150.21016721 |
| D39 | -179.74990631 |
| D40 | 178.97476058  |
| D41 | -0.61995562   |
| D42 | 179.59067271  |
| D43 | -5.04053067   |
| D44 | 3.06295780    |
| D45 | -1.05976163   |
| D46 | 179.81704661  |
| D47 | 179.80647108  |
| D48 | 179.39835027  |
| D49 | 0.87097267    |
| D50 | 179.46698495  |
| D51 | -178.83081550 |
| D52 | 174.37668872  |

Number of immaginary frequency = 1 (eigenvalue=-451.9808)

|                                              |                             |
|----------------------------------------------|-----------------------------|
| Zero-point correction=                       | 0.430512 (Hartree/Particle) |
| Thermal correction to Energy=                | 0.457515                    |
| Thermal correction to Enthalpy=              | 0.458459                    |
| Thermal correction to Gibbs Free Energy=     | 0.371173                    |
| Sum of electronic and zero-point Energies=   | -1550.960249                |
| Sum of electronic and thermal Energies=      | -1550.933246                |
| Sum of electronic and thermal Enthalpies=    | -1550.932301                |
| Sum of electronic and thermal Free Energies= | -1551.019588                |

**Structure: Transition State of CPI (3) with Guanine**

|   |    |     |    |     |     |
|---|----|-----|----|-----|-----|
| C |    |     |    |     |     |
| C | 1  | B1  |    |     |     |
| C | 2  | B2  | 1  | A1  |     |
| C | 3  | B3  | 2  | A2  | 1   |
| C | 4  | B4  | 3  | A3  | 2   |
| C | 1  | B5  | 2  | A4  | 3   |
| C | 2  | B6  | 1  | A5  | 6   |
| C | 7  | B7  | 2  | A6  | 1   |
| N | 3  | B8  | 2  | A7  | 1   |
| C | 8  | B9  | 7  | A8  | 2   |
| O | 10 | B10 | 8  | A9  | 7   |
| N | 10 | B11 | 8  | A10 | 7   |
| C | 12 | B12 | 10 | A11 | 8   |
| C | 13 | B13 | 12 | A12 | 10  |
| C | 14 | B14 | 13 | A13 | 12  |
| C | 12 | B15 | 10 | A14 | 8   |
| C | 13 | B16 | 12 | A15 | 10  |
|   |    |     |    |     | D1  |
|   |    |     |    |     | D2  |
|   |    |     |    |     | D3  |
|   |    |     |    |     | D4  |
|   |    |     |    |     | D5  |
|   |    |     |    |     | D6  |
|   |    |     |    |     | D7  |
|   |    |     |    |     | D8  |
|   |    |     |    |     | D9  |
|   |    |     |    |     | D10 |
|   |    |     |    |     | D11 |
|   |    |     |    |     | D12 |
|   |    |     |    |     | D13 |
|   |    |     |    |     | D14 |

|   |    |     |    |     |    |     |
|---|----|-----|----|-----|----|-----|
| C | 17 | B17 | 13 | A16 | 12 | D15 |
| C | 18 | B18 | 17 | A17 | 13 | D16 |
| C | 19 | B19 | 18 | A18 | 17 | D17 |
| N | 19 | B20 | 18 | A19 | 17 | D18 |
| C | 21 | B21 | 19 | A20 | 18 | D19 |
| C | 22 | B22 | 21 | A21 | 19 | D20 |
| C | 15 | B23 | 14 | A22 | 13 | D21 |
| O | 18 | B24 | 17 | A23 | 13 | D22 |
| N | 24 | B25 | 15 | A24 | 14 | D23 |
| C | 26 | B26 | 24 | A25 | 15 | D24 |
| C | 27 | B27 | 26 | A26 | 24 | D25 |
| C | 28 | B28 | 27 | A27 | 26 | D26 |
| N | 29 | B29 | 28 | A28 | 27 | D27 |
| C | 26 | B30 | 24 | A29 | 15 | D28 |
| N | 27 | B31 | 26 | A30 | 24 | D29 |
| C | 32 | B32 | 27 | A31 | 26 | D30 |
| N | 33 | B33 | 32 | A32 | 27 | D31 |
| O | 29 | B34 | 28 | A33 | 27 | D32 |
| N | 31 | B35 | 26 | A34 | 24 | D33 |
| H | 24 | B36 | 15 | A35 | 14 | D34 |
| H | 24 | B37 | 15 | A36 | 14 | D35 |
| H | 15 | B38 | 14 | A37 | 13 | D36 |
| H | 17 | B39 | 13 | A38 | 12 | D37 |
| H | 16 | B40 | 12 | A39 | 10 | D38 |
| H | 16 | B41 | 12 | A40 | 10 | D39 |
| H | 30 | B42 | 29 | A41 | 28 | D40 |
| H | 21 | B43 | 19 | A42 | 18 | D41 |
| H | 23 | B44 | 22 | A43 | 21 | D42 |
| H | 22 | B45 | 21 | A44 | 19 | D43 |
| H | 9  | B46 | 3  | A45 | 2  | D44 |
| H | 7  | B47 | 2  | A46 | 1  | D45 |
| H | 4  | B48 | 3  | A47 | 2  | D46 |
| H | 5  | B49 | 4  | A48 | 3  | D47 |
| H | 6  | B50 | 1  | A49 | 2  | D48 |
| H | 1  | B51 | 6  | A50 | 5  | D49 |
| H | 33 | B52 | 32 | A51 | 27 | D50 |
| H | 32 | B53 | 27 | A52 | 26 | D51 |
| H | 36 | B54 | 31 | A53 | 26 | D52 |
| H | 36 | B55 | 31 | A54 | 26 | D53 |

|     |            |
|-----|------------|
| B1  | 1.40593593 |
| B2  | 1.42110339 |
| B3  | 1.39909785 |
| B4  | 1.38334078 |
| B5  | 1.38202456 |
| B6  | 1.42727064 |
| B7  | 1.38294605 |
| B8  | 1.36306041 |
| B9  | 1.48901551 |
| B10 | 1.22986351 |
| B11 | 1.36405444 |
| B12 | 1.42920299 |
| B13 | 1.42096356 |
| B14 | 1.48519023 |
| B15 | 1.46457013 |
| B16 | 1.37604084 |
| B17 | 1.45164107 |
| B18 | 1.45033064 |
| B19 | 1.39664545 |
| B20 | 1.36498880 |
| B21 | 1.36148012 |
| B22 | 1.38153276 |
| B23 | 1.49668854 |
| B24 | 1.24338535 |

|     |              |
|-----|--------------|
| B25 | 1.82624017   |
| B26 | 1.37141928   |
| B27 | 1.38679042   |
| B28 | 1.43727318   |
| B29 | 1.43796862   |
| B30 | 1.33105014   |
| B31 | 1.36020437   |
| B32 | 1.37806471   |
| B33 | 1.30268112   |
| B34 | 1.20831352   |
| B35 | 1.35198842   |
| B36 | 1.08456119   |
| B37 | 1.08755108   |
| B38 | 1.09461716   |
| B39 | 1.08076909   |
| B40 | 1.09775154   |
| B41 | 1.08997421   |
| B42 | 1.01356809   |
| B43 | 1.00875611   |
| B44 | 1.08345005   |
| B45 | 1.08147306   |
| B46 | 1.01123712   |
| B47 | 1.07981298   |
| B48 | 1.08634304   |
| B49 | 1.08645816   |
| B50 | 1.08625982   |
| B51 | 1.08677384   |
| B52 | 1.08176635   |
| B53 | 1.01025595   |
| B54 | 1.00725075   |
| B55 | 1.00728457   |
| A1  | 119.11098550 |
| A2  | 122.10100108 |
| A3  | 117.29997317 |
| A4  | 118.79089919 |
| A5  | 133.99890357 |
| A6  | 107.16002737 |
| A7  | 107.16900429 |
| A8  | 138.63422197 |
| A9  | 117.11998705 |
| A10 | 119.92602084 |
| A11 | 124.96500561 |
| A12 | 107.20297993 |
| A13 | 109.87601284 |
| A14 | 126.13352930 |
| A15 | 128.26856507 |
| A16 | 119.98198717 |
| A17 | 113.53601312 |
| A18 | 126.93202682 |
| A19 | 125.05267097 |
| A20 | 109.67100498 |
| A21 | 108.83897780 |
| A22 | 92.97499797  |
| A23 | 125.21869872 |
| A24 | 115.68099993 |
| A25 | 118.41796029 |
| A26 | 127.77197206 |
| A27 | 119.40297590 |
| A28 | 109.43302007 |
| A29 | 119.11725105 |
| A30 | 127.04444410 |
| A31 | 106.50603953 |
| A32 | 112.80600193 |
| A33 | 131.74096558 |

|     |               |
|-----|---------------|
| A34 | 120.03745281  |
| A35 | 114.39400787  |
| A36 | 114.81800863  |
| A37 | 118.04373259  |
| A38 | 121.72301274  |
| A39 | 110.39211941  |
| A40 | 110.87268913  |
| A41 | 112.58903197  |
| A42 | 121.86997635  |
| A43 | 125.43815509  |
| A44 | 121.22485256  |
| A45 | 129.21655423  |
| A46 | 125.46766355  |
| A47 | 121.33101257  |
| A48 | 119.26599429  |
| A49 | 119.70006110  |
| A50 | 120.75510624  |
| A51 | 121.21053700  |
| A52 | 127.52897009  |
| A53 | 119.98800305  |
| A54 | 119.14503087  |
| D1  | 0.36296618    |
| D2  | -0.12194244   |
| D3  | -0.28609187   |
| D4  | -179.83914324 |
| D5  | 179.25993488  |
| D6  | -179.09768147 |
| D7  | 177.48644104  |
| D8  | -165.43419867 |
| D9  | 16.86275146   |
| D10 | 179.60400864  |
| D11 | -162.79098158 |
| D12 | 5.26199438    |
| D13 | 3.74360286    |
| D14 | 17.76305979   |
| D15 | -179.67444111 |
| D16 | -0.50795136   |
| D17 | 0.06793790    |
| D18 | -179.69895060 |
| D19 | 179.93409752  |
| D20 | -0.01302725   |
| D21 | 94.15600116   |
| D22 | 179.68662590  |
| D23 | 174.03197781  |
| D24 | 70.21103141   |
| D25 | -146.27501474 |
| D26 | -0.32098405   |
| D27 | -0.52701218   |
| D28 | -75.49542044  |
| D29 | 34.05507836   |
| D30 | -179.42837635 |
| D31 | -1.07100058   |
| D32 | 179.71857652  |
| D33 | -31.83511883  |
| D34 | 59.31597823   |
| D35 | -71.36196941  |
| D36 | -145.96089703 |
| D37 | -0.36738357   |
| D38 | -92.66693825  |
| D39 | 28.15163909   |
| D40 | -178.71994869 |
| D41 | 1.00404935    |
| D42 | -177.95715797 |
| D43 | -179.34309551 |

|     |               |
|-----|---------------|
| D44 | -171.63632970 |
| D45 | -3.72952980   |
| D46 | 179.70494365  |
| D47 | 179.82399865  |
| D48 | -179.95900365 |
| D49 | 179.94893852  |
| D50 | 177.87336892  |
| D51 | -4.46935627   |
| D52 | -171.92179857 |
| D53 | -17.47970394  |

Number of imaginary frequency : 1 (eigenvalue=-464.5134)

|                                              |                             |
|----------------------------------------------|-----------------------------|
| Zero-point correction=                       | 0.434555 (Hartree/Particle) |
| Thermal correction to Energy=                | 0.462978                    |
| Thermal correction to Enthalpy=              | 0.463922                    |
| Thermal correction to Gibbs Free Energy=     | 0.372153                    |
| Sum of electronic and zero-point Energies=   | -1626.103829                |
| Sum of electronic and thermal Energies=      | -1626.075406                |
| Sum of electronic and thermal Enthalpies=    | -1626.074461                |
| Sum of electronic and thermal Free Energies= | -1626.166231                |

**Structure: Transition State of DSI (2) with Pyridine**

|   |    |     |    |     |    |     |
|---|----|-----|----|-----|----|-----|
| C |    |     |    |     |    |     |
| C | 1  | B1  |    |     |    |     |
| C | 2  | B2  | 1  | A1  |    |     |
| N | 3  | B3  | 2  | A2  | 1  | D1  |
| C | 4  | B4  | 3  | A3  | 2  | D2  |
| C | 1  | B5  | 5  | A4  | 4  | D3  |
| C | 6  | B6  | 1  | A5  | 5  | D4  |
| C | 7  | B7  | 6  | A6  | 1  | D5  |
| C | 8  | B8  | 7  | A7  | 6  | D6  |
| C | 3  | B9  | 2  | A8  | 1  | D7  |
| N | 10 | B10 | 3  | A9  | 2  | D8  |
| C | 11 | B11 | 10 | A10 | 3  | D9  |
| C | 12 | B12 | 11 | A11 | 10 | D10 |
| C | 13 | B13 | 12 | A12 | 11 | D11 |
| C | 11 | B14 | 10 | A13 | 3  | D12 |
| C | 13 | B15 | 12 | A14 | 11 | D13 |
| C | 16 | B16 | 13 | A15 | 12 | D14 |
| C | 17 | B17 | 16 | A16 | 13 | D15 |
| C | 12 | B18 | 11 | A17 | 10 | D16 |
| C | 16 | B19 | 13 | A18 | 12 | D17 |
| C | 20 | B20 | 16 | A19 | 13 | D18 |
| N | 17 | B21 | 16 | A20 | 13 | D19 |
| C | 14 | B22 | 13 | A21 | 12 | D20 |
| O | 18 | B23 | 17 | A22 | 16 | D21 |
| O | 10 | B24 | 3  | A23 | 2  | D22 |
| N | 23 | B25 | 14 | A24 | 13 | D23 |
| C | 26 | B26 | 23 | A25 | 14 | D24 |
| C | 27 | B27 | 26 | A26 | 23 | D25 |
| C | 28 | B28 | 27 | A27 | 26 | D26 |
| C | 29 | B29 | 28 | A28 | 27 | D27 |
| C | 26 | B30 | 23 | A29 | 14 | D28 |
| H | 23 | B31 | 14 | A30 | 13 | D29 |
| H | 23 | B32 | 14 | A31 | 13 | D30 |
| H | 14 | B33 | 13 | A32 | 12 | D31 |
| H | 19 | B34 | 12 | A33 | 11 | D32 |
| H | 15 | B35 | 11 | A34 | 10 | D33 |
| H | 15 | B36 | 11 | A35 | 10 | D34 |
| H | 27 | B37 | 26 | A36 | 23 | D35 |
| H | 28 | B38 | 27 | A37 | 26 | D36 |
| H | 29 | B39 | 28 | A38 | 27 | D37 |

|   |    |     |    |     |    |     |
|---|----|-----|----|-----|----|-----|
| H | 30 | B40 | 29 | A39 | 28 | D38 |
| H | 31 | B41 | 26 | A40 | 23 | D39 |
| H | 22 | B42 | 17 | A41 | 16 | D40 |
| H | 20 | B43 | 16 | A42 | 13 | D41 |
| C | 21 | B44 | 20 | A43 | 16 | D42 |
| H | 4  | B45 | 3  | A44 | 2  | D43 |
| H | 2  | B46 | 1  | A45 | 6  | D44 |
| H | 9  | B47 | 8  | A46 | 7  | D45 |
| H | 8  | B48 | 7  | A47 | 6  | D46 |
| H | 7  | B49 | 6  | A48 | 1  | D47 |
| H | 6  | B50 | 1  | A49 | 5  | D48 |
| O | 45 | B51 | 21 | A50 | 20 | D49 |
| O | 45 | B52 | 21 | A51 | 20 | D50 |
| C | 52 | B53 | 45 | A52 | 21 | D51 |
| H | 54 | B54 | 52 | A53 | 45 | D52 |
| H | 54 | B55 | 52 | A54 | 45 | D53 |
| H | 54 | B56 | 52 | A55 | 45 | D54 |

|     |            |
|-----|------------|
| B1  | 1.42619837 |
| B2  | 1.38241686 |
| B3  | 1.37485327 |
| B4  | 1.36237605 |
| B5  | 1.40539900 |
| B6  | 1.38199150 |
| B7  | 1.41024540 |
| B8  | 1.38322920 |
| B9  | 1.48491877 |
| B10 | 1.36768467 |
| B11 | 1.42288788 |
| B12 | 1.42619159 |
| B13 | 1.48547592 |
| B14 | 1.46445442 |
| B15 | 1.42376705 |
| B16 | 1.40421907 |
| B17 | 1.45771349 |
| B18 | 1.37396338 |
| B19 | 1.41713088 |
| B20 | 1.38985365 |
| B21 | 1.35345369 |
| B22 | 1.48544913 |
| B23 | 1.23905533 |
| B24 | 1.22842503 |
| B25 | 1.90997740 |
| B26 | 1.33861022 |
| B27 | 1.38675862 |
| B28 | 1.39271562 |
| B29 | 1.39330058 |
| B30 | 1.33906904 |
| B31 | 1.08555119 |
| B32 | 1.08613587 |
| B33 | 1.09372194 |
| B34 | 1.08077952 |
| B35 | 1.09811262 |
| B36 | 1.09239846 |
| B37 | 1.08773253 |
| B38 | 1.08531070 |
| B39 | 1.08574435 |
| B40 | 1.08520916 |
| B41 | 1.08786374 |
| B42 | 1.01044199 |
| B43 | 1.08176655 |
| B44 | 1.45559844 |
| B45 | 1.01067767 |
| B46 | 1.07960451 |



|     |              |
|-----|--------------|
| B47 | 1.08636603   |
| B48 | 1.08651890   |
| B49 | 1.08642260   |
| B50 | 1.08708062   |
| B51 | 1.34728488   |
| B52 | 1.21520610   |
| B53 | 1.42276490   |
| B54 | 1.09063727   |
| B55 | 1.09363685   |
| B56 | 1.09357896   |
| A1  | 107.12948922 |
| A2  | 108.54821524 |
| A3  | 110.26336177 |
| A4  | 119.05937690 |
| A5  | 118.87181880 |
| A6  | 121.11521775 |
| A7  | 121.51232487 |
| A8  | 137.93794556 |
| A9  | 119.52464794 |
| A10 | 125.05472728 |
| A11 | 107.41986560 |
| A12 | 109.52080948 |
| A13 | 125.41981785 |
| A14 | 118.27374947 |
| A15 | 116.83233664 |
| A16 | 126.39549125 |
| A17 | 128.03991447 |
| A18 | 136.40205892 |
| A19 | 106.68812650 |
| A20 | 108.28983965 |
| A21 | 89.20544634  |
| A22 | 121.11343210 |
| A23 | 117.67221109 |
| A24 | 111.65876145 |
| A25 | 117.48347431 |
| A26 | 122.16096023 |
| A27 | 118.77419387 |
| A28 | 118.84576058 |
| A29 | 118.07824832 |
| A30 | 116.63031321 |
| A31 | 116.31944241 |
| A32 | 118.47648794 |
| A33 | 121.65358944 |
| A34 | 110.59871423 |
| A35 | 110.56413075 |
| A36 | 115.98592821 |
| A37 | 119.86863950 |
| A38 | 120.58257230 |
| A39 | 121.45505853 |
| A40 | 116.08349779 |
| A41 | 124.70115096 |
| A42 | 128.56360763 |
| A43 | 132.18662935 |
| A44 | 120.26617009 |
| A45 | 125.63769621 |
| A46 | 121.34499743 |
| A47 | 119.20984821 |
| A48 | 119.75193173 |
| A49 | 120.43107929 |
| A50 | 112.21052583 |
| A51 | 124.16407540 |
| A52 | 114.35589605 |
| A53 | 105.71805558 |
| A54 | 110.81362648 |

|     |               |
|-----|---------------|
| A55 | 110.79680977  |
| D1  | -0.19781392   |
| D2  | 0.33777130    |
| D3  | -179.89022516 |
| D4  | 0.00625129    |
| D5  | 0.02853913    |
| D6  | 0.01336872    |
| D7  | 175.57348846  |
| D8  | 16.58868523   |
| D9  | -175.15048965 |
| D10 | -165.42543292 |
| D11 | 4.47774541    |
| D12 | 7.29982690    |
| D13 | -176.73011985 |
| D14 | -1.66713103   |
| D15 | 0.54518486    |
| D16 | 16.27246545   |
| D17 | 178.10379324  |
| D18 | -179.78106348 |
| D19 | 179.78203080  |
| D20 | 95.64115910   |
| D21 | 179.90970919  |
| D22 | -164.25887874 |
| D23 | 178.41019745  |
| D24 | -72.06545012  |
| D25 | 154.63119702  |
| D26 | -0.18352218   |
| D27 | 0.12620082    |
| D28 | 82.43440125   |
| D29 | 68.82239536   |
| D30 | -72.48091013  |
| D31 | -145.62406336 |
| D32 | -2.11115102   |
| D33 | -87.97880059  |
| D34 | 32.73773379   |
| D35 | -25.82946916  |
| D36 | 179.44597224  |
| D37 | -179.73328452 |
| D38 | 179.53329506  |
| D39 | 25.43503668   |
| D40 | -179.10652017 |
| D41 | -0.54799499   |
| D42 | 179.54624651  |
| D43 | 173.54316231  |
| D44 | -2.92854989   |
| D45 | -179.85321696 |
| D46 | -179.82385303 |
| D47 | -179.81061906 |
| D48 | -179.70911061 |
| D49 | 0.65627068    |
| D50 | -179.36352283 |
| D51 | -179.61322947 |
| D52 | 179.80717485  |
| D53 | -60.49688942  |
| D54 | 60.15529889   |

Number of immaginary frequency:1

Energy=-1560.2200443(a.u.)

**Structure: Transition State of DSI (2) with Adenine**

N  
C

1

B1

|   |    |     |    |     |    |     |
|---|----|-----|----|-----|----|-----|
| C | 2  | B2  | 1  | A1  |    |     |
| N | 3  | B3  | 2  | A2  | 1  | D1  |
| C | 1  | B4  | 2  | A3  | 3  | D2  |
| C | 2  | B5  | 1  | A4  | 5  | D3  |
| N | 6  | B6  | 2  | A5  | 1  | D4  |
| C | 7  | B7  | 6  | A6  | 2  | D5  |
| N | 8  | B8  | 7  | A7  | 6  | D6  |
| N | 6  | B9  | 2  | A8  | 1  | D7  |
| C | 9  | B10 | 8  | A9  | 7  | D8  |
| C | 11 | B11 | 9  | A10 | 8  | D9  |
| C | 12 | B12 | 11 | A11 | 9  | D10 |
| C | 13 | B13 | 12 | A12 | 11 | D11 |
| N | 14 | B14 | 13 | A13 | 12 | D12 |
| C | 15 | B15 | 14 | A14 | 13 | D13 |
| C | 13 | B16 | 12 | A15 | 11 | D14 |
| C | 17 | B17 | 13 | A16 | 12 | D15 |
| C | 18 | B18 | 17 | A17 | 13 | D16 |
| C | 14 | B19 | 13 | A18 | 12 | D17 |
| C | 17 | B20 | 13 | A19 | 12 | D18 |
| C | 21 | B21 | 17 | A20 | 13 | D19 |
| N | 18 | B22 | 17 | A21 | 13 | D20 |
| C | 15 | B23 | 14 | A22 | 13 | D21 |
| O | 24 | B24 | 15 | A23 | 14 | D22 |
| O | 19 | B25 | 18 | A24 | 17 | D23 |
| C | 22 | B26 | 21 | A25 | 17 | D24 |
| O | 27 | B27 | 22 | A26 | 21 | D25 |
| C | 24 | B28 | 15 | A27 | 14 | D26 |
| N | 29 | B29 | 24 | A28 | 15 | D27 |
| C | 30 | B30 | 29 | A29 | 24 | D28 |
| C | 31 | B31 | 30 | A30 | 29 | D29 |
| C | 29 | B32 | 24 | A31 | 15 | D30 |
| C | 31 | B33 | 30 | A32 | 29 | D31 |
| C | 34 | B34 | 31 | A33 | 30 | D32 |
| C | 35 | B35 | 34 | A34 | 31 | D33 |
| C | 36 | B36 | 35 | A35 | 34 | D34 |
| O | 27 | B37 | 22 | A36 | 21 | D35 |
| C | 38 | B38 | 27 | A37 | 22 | D36 |
| H | 11 | B39 | 9  | A38 | 8  | D37 |
| H | 11 | B40 | 9  | A39 | 8  | D38 |
| H | 12 | B41 | 11 | A40 | 9  | D39 |
| H | 20 | B42 | 14 | A41 | 13 | D40 |
| H | 16 | B43 | 15 | A42 | 14 | D41 |
| H | 16 | B44 | 15 | A43 | 14 | D42 |
| H | 8  | B45 | 7  | A44 | 6  | D43 |
| H | 23 | B46 | 18 | A45 | 17 | D44 |
| H | 21 | B47 | 17 | A46 | 13 | D45 |
| H | 30 | B48 | 29 | A47 | 24 | D46 |
| H | 33 | B49 | 29 | A48 | 24 | D47 |
| H | 34 | B50 | 31 | A49 | 30 | D48 |
| H | 35 | B51 | 34 | A50 | 31 | D49 |
| H | 36 | B52 | 35 | A51 | 34 | D50 |
| H | 37 | B53 | 36 | A52 | 35 | D51 |
| H | 10 | B54 | 6  | A53 | 2  | D52 |
| H | 10 | B55 | 6  | A54 | 2  | D53 |
| H | 5  | B56 | 1  | A55 | 2  | D54 |
| H | 4  | B57 | 3  | A56 | 2  | D55 |
| H | 39 | B58 | 38 | A57 | 27 | D56 |
| H | 39 | B59 | 38 | A58 | 27 | D57 |
| H | 39 | B60 | 38 | A59 | 27 | D58 |

B1 1.37285209  
 B2 1.39480508  
 B3 1.36403074  
 B4 1.30597703

|     |              |
|-----|--------------|
| B5  | 1.40930038   |
| B6  | 1.34641825   |
| B7  | 1.32231603   |
| B8  | 1.33688139   |
| B9  | 1.33616682   |
| B10 | 1.90756052   |
| B11 | 1.48239475   |
| B12 | 1.49154047   |
| B13 | 1.42069587   |
| B14 | 1.43081634   |
| B15 | 1.46486492   |
| B16 | 1.42262059   |
| B17 | 1.40599930   |
| B18 | 1.45667152   |
| B19 | 1.37526626   |
| B20 | 1.41754511   |
| B21 | 1.38997413   |
| B22 | 1.35440759   |
| B23 | 1.36217612   |
| B24 | 1.22811774   |
| B25 | 1.24051470   |
| B26 | 1.45521925   |
| B27 | 1.21542611   |
| B28 | 1.49369881   |
| B29 | 1.37417726   |
| B30 | 1.36314082   |
| B31 | 1.42079245   |
| B32 | 1.38596395   |
| B33 | 1.39904213   |
| B34 | 1.38321987   |
| B35 | 1.41042155   |
| B36 | 1.38254004   |
| B37 | 1.34783312   |
| B38 | 1.42232991   |
| B39 | 1.08580894   |
| B40 | 1.08630025   |
| B41 | 1.09302146   |
| B42 | 1.08093168   |
| B43 | 1.09742510   |
| B44 | 1.08894110   |
| B45 | 1.08834183   |
| B46 | 1.01025212   |
| B47 | 1.08184190   |
| B48 | 1.01185535   |
| B49 | 1.08040790   |
| B50 | 1.08617003   |
| B51 | 1.08630730   |
| B52 | 1.08623886   |
| B53 | 1.08698346   |
| B54 | 1.00771758   |
| B55 | 1.00783806   |
| B56 | 1.08267111   |
| B57 | 1.01606197   |
| B58 | 1.09069243   |
| B59 | 1.09371076   |
| B60 | 1.09364981   |
| A1  | 111.36698620 |
| A2  | 104.77501998 |
| A3  | 103.88008425 |
| A4  | 131.64031223 |
| A5  | 119.02296405 |
| A6  | 118.50102963 |
| A7  | 127.90300192 |
| A8  | 122.15503187 |

|     |               |
|-----|---------------|
| A9  | 118.55779204  |
| A10 | 115.23100807  |
| A11 | 90.76701142   |
| A12 | 109.70198314  |
| A13 | 107.24902762  |
| A14 | 108.26698855  |
| A15 | 132.30097094  |
| A16 | 116.79098410  |
| A17 | 126.65998942  |
| A18 | 125.04003243  |
| A19 | 136.47697997  |
| A20 | 106.71195865  |
| A21 | 108.24689389  |
| A22 | 124.33199635  |
| A23 | 123.31300659  |
| A24 | 121.18749601  |
| A25 | 132.09754055  |
| A26 | 124.24898782  |
| A27 | 119.87498683  |
| A28 | 112.79898867  |
| A29 | 110.49301249  |
| A30 | 107.17900736  |
| A31 | 138.83893426  |
| A32 | 130.71602291  |
| A33 | 117.30101852  |
| A34 | 121.55600460  |
| A35 | 121.15099839  |
| A36 | 112.20603196  |
| A37 | 114.35600696  |
| A38 | 94.39234949   |
| A39 | 96.89563035   |
| A40 | 115.62485474  |
| A41 | 121.72897563  |
| A42 | 110.10396065  |
| A43 | 111.50803692  |
| A44 | 116.59773207  |
| A45 | 124.57103236  |
| A46 | 128.53803011  |
| A47 | 119.84655061  |
| A48 | 127.10977256  |
| A49 | 121.33399862  |
| A50 | 119.26499340  |
| A51 | 119.13809315  |
| A52 | 120.76757998  |
| A53 | 120.25495255  |
| A54 | 119.43501487  |
| A55 | 125.82719915  |
| A56 | 128.84300428  |
| A57 | 105.72195367  |
| A58 | 110.83299100  |
| A59 | 110.81399469  |
| D1  | -0.32099629   |
| D2  | -0.09738653   |
| D3  | 179.40665026  |
| D4  | -179.30166232 |
| D5  | -0.37597699   |
| D6  | 0.10895730    |
| D7  | 0.47033808    |
| D8  | 177.51459936  |
| D9  | -99.10724738  |
| D10 | 175.97401585  |
| D11 | 94.53598840   |
| D12 | 2.69402894    |
| D13 | 16.60394723   |

|     |               |
|-----|---------------|
| D14 | -83.48282589  |
| D15 | 177.12407330  |
| D16 | 0.50496630    |
| D17 | -177.98927286 |
| D18 | -2.95516519   |
| D19 | -179.95513196 |
| D20 | 179.88330627  |
| D21 | -154.13497574 |
| D22 | -4.57708260   |
| D23 | 179.65929995  |
| D24 | 179.86431657  |
| D25 | -179.57675873 |
| D26 | 171.83698004  |
| D27 | -162.08304958 |
| D28 | -178.90097505 |
| D29 | -0.08501488   |
| D30 | 19.57992723   |
| D31 | -179.18748854 |
| D32 | 179.01279011  |
| D33 | -0.06300976   |
| D34 | 0.14301349    |
| D35 | 0.49519627    |
| D36 | -179.75899315 |
| D37 | 22.52769238   |
| D38 | 137.70797906  |
| D39 | 53.90257037   |
| D40 | -179.90115908 |
| D41 | 89.07579932   |
| D42 | -150.14225620 |
| D43 | -179.68300198 |
| D44 | -179.25451581 |
| D45 | -0.71903836   |
| D46 | -5.00060819   |
| D47 | 3.26302499    |
| D48 | -1.12120348   |
| D49 | 179.81102152  |
| D50 | 179.79126358  |
| D51 | 179.46051363  |
| D52 | 0.90198556    |
| D53 | 179.40600132  |
| D54 | -178.93972097 |
| D55 | 174.78225681  |
| D56 | 179.95500105  |
| D57 | -60.34204886  |
| D58 | 60.30202471   |

Number of imaginary frequency:1

Energy= -1779.0340364 (a.u.)

**Structure: Transition State of DSA (1) with Pyridine**

|   |    |     |   |     |   |    |
|---|----|-----|---|-----|---|----|
| C |    |     |   |     |   |    |
| C | 1  | B1  |   |     |   |    |
| C | 2  | B2  | 1 | A1  |   |    |
| C | 3  | B3  | 2 | A2  | 1 | D1 |
| C | 4  | B4  | 3 | A3  | 2 | D2 |
| H | 5  | B5  | 4 | A4  | 3 | D3 |
| H | 4  | B6  | 3 | A5  | 2 | D4 |
| H | 3  | B7  | 2 | A6  | 1 | D5 |
| H | 2  | B8  | 1 | A7  | 5 | D6 |
| H | 1  | B9  | 2 | A8  | 3 | D7 |
| N | 1  | B10 | 2 | A9  | 3 | D8 |
| C | 11 | B11 | 1 | A10 | 2 | D9 |

|   |    |     |    |     |    |     |
|---|----|-----|----|-----|----|-----|
| C | 12 | B12 | 11 | A11 | 1  | D10 |
| C | 12 | B13 | 11 | A12 | 1  | D11 |
| C | 14 | B14 | 12 | A13 | 11 | D12 |
| N | 15 | B15 | 14 | A14 | 12 | D13 |
| C | 16 | B16 | 15 | A15 | 14 | D14 |
| C | 17 | B17 | 16 | A16 | 15 | D15 |
| C | 18 | B18 | 17 | A17 | 16 | D16 |
| C | 19 | B19 | 18 | A18 | 17 | D17 |
| C | 20 | B20 | 19 | A19 | 18 | D18 |
| H | 15 | B21 | 14 | A20 | 12 | D19 |
| H | 15 | B22 | 14 | A21 | 12 | D20 |
| H | 14 | B23 | 12 | A22 | 11 | D21 |
| H | 18 | B24 | 17 | A23 | 16 | D22 |
| O | 19 | B25 | 18 | A24 | 17 | D23 |
| H | 12 | B26 | 11 | A25 | 1  | D24 |
| H | 12 | B27 | 11 | A26 | 1  | D25 |
| C | 21 | B28 | 20 | A27 | 19 | D26 |
| C | 29 | B29 | 21 | A28 | 20 | D27 |
| N | 20 | B30 | 19 | A29 | 18 | D28 |
| H | 31 | B31 | 20 | A30 | 19 | D29 |
| H | 29 | B32 | 21 | A31 | 20 | D30 |
| C | 30 | B33 | 29 | A32 | 21 | D31 |
| O | 34 | B34 | 30 | A33 | 29 | D32 |
| O | 34 | B35 | 30 | A34 | 29 | D33 |
| C | 36 | B36 | 34 | A35 | 30 | D34 |
| H | 37 | B37 | 36 | A36 | 34 | D35 |
| H | 37 | B38 | 36 | A37 | 34 | D36 |
| H | 37 | B39 | 36 | A38 | 34 | D37 |
| C | 16 | B40 | 15 | A39 | 14 | D38 |
| O | 41 | B41 | 16 | A40 | 15 | D39 |
| C | 41 | B42 | 16 | A41 | 15 | D40 |
| C | 43 | B43 | 41 | A42 | 16 | D41 |
| H | 44 | B44 | 43 | A43 | 41 | D42 |
| C | 44 | B45 | 43 | A44 | 41 | D43 |
| C | 46 | B46 | 44 | A45 | 43 | D44 |
| N | 47 | B47 | 46 | A46 | 44 | D45 |
| H | 48 | B48 | 47 | A47 | 46 | D46 |
| C | 47 | B49 | 46 | A48 | 44 | D47 |
| C | 50 | B50 | 47 | A49 | 46 | D48 |
| C | 51 | B51 | 50 | A50 | 47 | D49 |
| C | 52 | B52 | 51 | A51 | 50 | D50 |
| H | 53 | B53 | 52 | A52 | 51 | D51 |
| O | 50 | B54 | 47 | A53 | 46 | D52 |
| C | 55 | B55 | 50 | A54 | 47 | D53 |
| H | 56 | B56 | 55 | A55 | 50 | D54 |
| H | 56 | B57 | 55 | A56 | 50 | D55 |
| H | 56 | B58 | 55 | A57 | 50 | D56 |
| O | 51 | B59 | 50 | A58 | 47 | D57 |
| O | 52 | B60 | 51 | A59 | 50 | D58 |
| C | 61 | B61 | 52 | A60 | 51 | D59 |
| H | 62 | B62 | 61 | A61 | 52 | D60 |
| H | 62 | B63 | 61 | A62 | 52 | D61 |
| H | 62 | B64 | 61 | A63 | 52 | D62 |
| C | 60 | B65 | 51 | A64 | 50 | D63 |
| H | 66 | B66 | 60 | A65 | 51 | D64 |
| H | 66 | B67 | 60 | A66 | 51 | D65 |
| H | 66 | B68 | 60 | A67 | 51 | D66 |

|    |            |
|----|------------|
| B1 | 1.38673302 |
| B2 | 1.39277209 |
| B3 | 1.39327234 |
| B4 | 1.38647550 |
| B5 | 1.08786561 |
| B6 | 1.08519887 |

|     |              |
|-----|--------------|
| B7  | 1.08573682   |
| B8  | 1.08531076   |
| B9  | 1.08774927   |
| B10 | 1.33851491   |
| B11 | 1.91006022   |
| B12 | 2.08523772   |
| B13 | 1.48532519   |
| B14 | 1.52261201   |
| B15 | 1.46380744   |
| B16 | 1.42256310   |
| B17 | 1.37406323   |
| B18 | 1.45095144   |
| B19 | 1.45785132   |
| B20 | 1.40431265   |
| B21 | 1.09233893   |
| B22 | 1.09826328   |
| B23 | 1.09367373   |
| B24 | 1.08085231   |
| B25 | 1.23918295   |
| B26 | 1.08609680   |
| B27 | 1.08553658   |
| B28 | 1.41706086   |
| B29 | 1.38988709   |
| B30 | 1.35351536   |
| B31 | 1.01041021   |
| B32 | 1.08174347   |
| B33 | 1.45542976   |
| B34 | 1.21525172   |
| B35 | 1.34740934   |
| B36 | 1.42269911   |
| B37 | 1.09365453   |
| B38 | 1.09065281   |
| B39 | 1.09359813   |
| B40 | 1.36883988   |
| B41 | 1.22782013   |
| B42 | 1.48459449   |
| B43 | 1.38497576   |
| B44 | 1.07953919   |
| B45 | 1.42574349   |
| B46 | 1.41569647   |
| B47 | 1.35918035   |
| B48 | 1.00994018   |
| B49 | 1.40215344   |
| B50 | 1.38931308   |
| B51 | 1.42425782   |
| B52 | 1.37935666   |
| B53 | 1.08560853   |
| B54 | 1.36318820   |
| B55 | 1.42381554   |
| B56 | 1.09307635   |
| B57 | 1.09713873   |
| B58 | 1.09201349   |
| B59 | 1.37071381   |
| B60 | 1.37173162   |
| B61 | 1.41991152   |
| B62 | 1.09260599   |
| B63 | 1.09517475   |
| B64 | 1.09787685   |
| B65 | 1.42219864   |
| B66 | 1.09677545   |
| B67 | 1.09527206   |
| B68 | 1.09248455   |
| A1  | 118.76646070 |
| A2  | 118.84977285 |



|     |              |
|-----|--------------|
| A3  | 118.74303715 |
| A4  | 121.74699256 |
| A5  | 121.45533241 |
| A6  | 120.58586858 |
| A7  | 119.87571616 |
| A8  | 121.85897127 |
| A9  | 122.16070305 |
| A10 | 117.50649799 |
| A11 | 157.09908489 |
| A12 | 111.69823842 |
| A13 | 113.71010749 |
| A14 | 103.84498058 |
| A15 | 109.48711942 |
| A16 | 128.05341839 |
| A17 | 120.22660492 |
| A18 | 113.73958248 |
| A19 | 126.39139274 |
| A20 | 113.07783739 |
| A21 | 109.77970621 |
| A22 | 115.44196852 |
| A23 | 121.63679006 |
| A24 | 125.16447047 |
| A25 | 96.21959030  |
| A26 | 96.43100889  |
| A27 | 106.76746550 |
| A28 | 106.69202397 |
| A29 | 125.31898187 |
| A30 | 124.69603207 |
| A31 | 128.55333374 |
| A32 | 132.17026029 |
| A33 | 124.19409583 |
| A34 | 112.19738487 |
| A35 | 114.35868429 |
| A36 | 110.82345412 |
| A37 | 105.71922706 |
| A38 | 110.80098855 |
| A39 | 125.40674417 |
| A40 | 122.77139157 |
| A41 | 119.42864999 |
| A42 | 137.76871198 |
| A43 | 127.08328572 |
| A44 | 107.31935564 |
| A45 | 106.32528284 |
| A46 | 108.02482429 |
| A47 | 128.05606780 |
| A48 | 122.62348442 |
| A49 | 117.14573392 |
| A50 | 120.79766503 |
| A51 | 121.61446912 |
| A52 | 119.17207562 |
| A53 | 118.46041018 |
| A54 | 115.51110782 |
| A55 | 111.19607415 |
| A56 | 110.65379438 |
| A57 | 105.95113446 |
| A58 | 119.57975956 |
| A59 | 118.79387756 |
| A60 | 114.04048331 |
| A61 | 106.35304582 |
| A62 | 111.31493108 |
| A63 | 110.74563256 |
| A64 | 113.27407941 |
| A65 | 110.66945252 |
| A66 | 110.80385680 |

|     |               |
|-----|---------------|
| A67 | 106.35811844  |
| D1  | 0.15707595    |
| D2  | -0.32386195   |
| D3  | -179.58099039 |
| D4  | 179.55744910  |
| D5  | -179.69005562 |
| D6  | 179.66877942  |
| D7  | -179.74034469 |
| D8  | -0.22580376   |
| D9  | 154.80524738  |
| D10 | -69.34580240  |
| D11 | -72.24673978  |
| D12 | -77.59326700  |
| D13 | -69.93013912  |
| D14 | -23.74734783  |
| D15 | -165.83715663 |
| D16 | 177.73185526  |
| D17 | -0.75350572   |
| D18 | 0.63572943    |
| D19 | 49.94078247   |
| D20 | 171.74626038  |
| D21 | 57.01184597   |
| D22 | -2.13866484   |
| D23 | -179.93857969 |
| D24 | 166.17113579  |
| D25 | 49.78100592   |
| D26 | -179.31991663 |
| D27 | -0.01391867   |
| D28 | -178.53458081 |
| D29 | 0.15605957    |
| D30 | 179.21659697  |
| D31 | 179.62678470  |
| D32 | -179.51575377 |
| D33 | 0.50880192    |
| D34 | -179.69003912 |
| D35 | -60.44852154  |
| D36 | 179.85544711  |
| D37 | 60.20260953   |
| D38 | 154.05535529  |
| D39 | -171.56816123 |
| D40 | 7.53953760    |
| D41 | 16.81004421   |
| D42 | -1.02968033   |
| D43 | 175.91224941  |
| D44 | -0.17968876   |
| D45 | 0.22480398    |
| D46 | -175.26326088 |
| D47 | 179.48463184  |
| D48 | 0.22310638    |
| D49 | 0.94493049    |
| D50 | -1.14944258   |
| D51 | -179.55021608 |
| D52 | -176.88123163 |
| D53 | -120.64768186 |
| D54 | -63.73487294  |
| D55 | 58.37908552   |
| D56 | 176.75039840  |
| D57 | -179.79696287 |
| D58 | -178.20065316 |
| D59 | -74.67109765  |
| D60 | -179.65230153 |
| D61 | 61.07944682   |
| D62 | -61.04360736  |
| D63 | 101.67099074  |

D64 -61.09477849  
 D65 61.06552954  
 D66 -179.86763091

Number of immaginary frequency:1 (eigenvalue=-531.3034)

Zero-point correction= 0.547998 (Hartree/Particle)  
 Thermal correction to Energy= 0.585309  
 Thermal correction to Enthalpy= 0.586253  
 Thermal correction to Gibbs Free Energy= 0.473554  
 Sum of electronic and zero-point Energies= -1902.849700  
 Sum of electronic and thermal Energies= -1902.812388  
 Sum of electronic and thermal Enthalpies= -1902.811444  
 Sum of electronic and thermal Free Energies= -1902.924144

**Structure: Transition State of DSA (1) with Adenine**

```

c
c 1 cc2
c 2 cc3      1 ccc3
c 3 cc4      2 ccc4      1 dih4
c 4 cc5      3 ccc5      2 dih5
c 5 cc6      4 ccc6      3 dih6
n 3 nc7      2 ncc7      1 dih7
c 7 cn8      3 cnc8      2 dih8
c 8 cc9      7 ccn9      3 dih9
c 8 cc10     9 ccc10     2 dih10
o 10 oc11    8 occ11     9 dih11
o 4 oc12     3 occ12     2 dih12
c 12 co13    4 coc13     3 dih13
o 5 oc14     4 occ14     3 dih14
c 14 co15    5 coc15     4 dih15
o 6 oc16     5 occ16     4 dih16
c 16 co17    6 coc17     5 dih17
n 10 nc18    8 ncc18     9 dih18
c 18 cn19    10 cnc19    8 dih19
c 19 cc20    18 ccn20    10 dih20
c 20 cc21    19 ccc21    18 dih21
c 21 cc22    20 ccc22    19 dih22
c 19 cc23    20 ccc23    21 dih23
c 23 cc24    19 ccc24    20 dih24
c 24 cc25    23 ccc25    19 dih25
c 25 cc26    24 ccc26    23 dih26
n 25 nc27    26 ncc27    20 dih27
c 27 cn28    25 cnc28    26 dih28
c 28 cc29    27 ccn29    25 dih29
c 21 cc30    20 ccc30    19 dih30
n 30 nc31    21 ncc31    20 dih31
c 31 cn32    30 cnc32    21 dih32
c 32 cc33    31 ccn33    30 dih33
c 33 cc34    32 ccc34    31 dih34
n 34 nc35    33 ncc35    32 dih35
c 35 cn36    34 cnc36    33 dih36
n 32 nc37    33 ncc37    34 dih37
c 37 cn38    32 cnc38    33 dih38
n 38 nc39    37 ncn39    32 dih39
n 34 nc40    33 ncc40    39 dih40
o 24 oc41    25 occ41    26 dih41
c 28 cc42    29 ccc42    26 dih42
o 42 oc43    28 occ43    29 dih43
c 43 co44    42 coc44    28 dih44
o 42 oc45    28 occ45    29 dih45
h 30 hc46    31 hcn46    32 dih46
h 30 hc47    31 hcn47    32 dih47

```

|   |    |      |    |       |    |       |
|---|----|------|----|-------|----|-------|
| h | 21 | hc48 | 30 | hcc48 | 31 | dih48 |
| h | 23 | hc49 | 19 | hcc49 | 20 | dih49 |
| h | 22 | hc50 | 21 | hcc50 | 30 | dih50 |
| h | 22 | hc51 | 21 | hcc51 | 30 | dih51 |
| h | 36 | hc52 | 35 | hcn52 | 34 | dih52 |
| h | 27 | hn53 | 25 | hnc53 | 26 | dih53 |
| h | 29 | hc54 | 26 | hcc54 | 20 | dih54 |
| h | 7  | hn55 | 8  | hnc55 | 10 | dih55 |
| h | 9  | hc56 | 8  | hcc56 | 10 | dih56 |
| h | 1  | hc57 | 2  | hcc57 | 9  | dih57 |
| h | 40 | hn58 | 34 | hnc58 | 33 | dih58 |
| h | 40 | hn59 | 34 | hnc59 | 33 | dih59 |
| h | 38 | hc60 | 39 | hcn60 | 33 | dih60 |
| h | 37 | hn61 | 32 | hnc61 | 33 | dih61 |
| h | 44 | hc62 | 43 | hco62 | 42 | dih62 |
| h | 44 | hc63 | 43 | hco63 | 42 | dih63 |
| h | 44 | hc64 | 43 | hco64 | 42 | dih64 |
| h | 17 | hc65 | 16 | hco65 | 6  | dih65 |
| h | 17 | hc66 | 16 | hco66 | 6  | dih66 |
| h | 17 | hc67 | 16 | hco67 | 6  | dih67 |
| h | 15 | hc68 | 14 | hco68 | 5  | dih68 |
| h | 15 | hc69 | 14 | hco69 | 5  | dih69 |
| h | 15 | hc70 | 14 | hco70 | 5  | dih70 |
| h | 13 | hc71 | 12 | hco71 | 4  | dih71 |
| h | 13 | hc72 | 12 | hco72 | 4  | dih72 |
| h | 13 | hc73 | 12 | hco73 | 4  | dih73 |

|       |          |
|-------|----------|
| cc2   | 1.409847 |
| cc3   | 1.408365 |
| ccc3  | 119.364  |
| cc4   | 1.405823 |
| ccc4  | 123.090  |
| dih4  | 1.058    |
| cc5   | 1.392138 |
| ccc5  | 117.088  |
| dih5  | -0.804   |
| cc6   | 1.433297 |
| ccc6  | 120.185  |
| dih6  | -0.117   |
| nc7   | 1.367746 |
| ncc7  | 108.327  |
| dih7  | -177.855 |
| cn8   | 1.378840 |
| cnc8  | 109.183  |
| dih8  | -1.840   |
| cc9   | 1.380990 |
| ccn9  | 108.695  |
| dih9  | 1.811    |
| cc10  | 1.490533 |
| ccc10 | 137.528  |
| dih10 | 176.654  |
| oc11  | 1.228217 |
| occ11 | 117.236  |
| dih11 | -151.138 |
| oc12  | 1.354507 |
| occ12 | 115.023  |
| dih12 | -178.147 |
| co13  | 1.419630 |
| coc13 | 120.251  |
| dih13 | -151.254 |
| oc14  | 1.366736 |
| occ14 | 119.857  |
| dih14 | -175.288 |
| co15  | 1.421966 |

|       |          |
|-------|----------|
| coc15 | 115.828  |
| dih15 | -114.727 |
| oc16  | 1.358951 |
| occ16 | 113.639  |
| dih16 | -177.816 |
| co17  | 1.407699 |
| coc17 | 117.455  |
| dih17 | 178.465  |
| nc18  | 1.361453 |
| ncc18 | 118.410  |
| dih18 | 32.042   |
| cn19  | 1.434721 |
| cnc19 | 124.325  |
| dih19 | 172.269  |
| cc20  | 1.406155 |
| ccn20 | 107.413  |
| dih20 | -146.720 |
| cc21  | 1.482331 |
| ccc21 | 109.970  |
| dih21 | 6.685    |
| cc22  | 1.530560 |
| ccc22 | 100.874  |
| dih22 | -24.439  |
| cc23  | 1.384612 |
| ccc23 | 125.648  |
| dih23 | -172.539 |
| cc24  | 1.441709 |
| ccc24 | 119.953  |
| dih24 | 1.634    |
| cc25  | 1.456513 |
| ccc25 | 112.997  |
| dih25 | 0.267    |
| cc26  | 1.411093 |
| ccc26 | 126.770  |
| dih26 | -0.488   |
| nc27  | 1.353479 |
| ncc27 | 108.234  |
| dih27 | 179.356  |
| cn28  | 1.367546 |
| cnc28 | 109.720  |
| dih28 | 0.323    |
| cc29  | 1.389219 |
| ccn29 | 108.672  |
| dih29 | -0.280   |
| cc30  | 1.554570 |
| ccc30 | 108.028  |
| dih30 | 93.171   |
| nc31  | 1.469994 |
| ncc31 | 114.928  |
| dih31 | 175.086  |
| cn32  | 1.362923 |
| cnc32 | 124.931  |
| dih32 | 92.356   |
| cc33  | 1.389674 |
| ccn33 | 122.500  |
| dih33 | -173.502 |
| cc34  | 1.412767 |
| ccc34 | 118.048  |
| dih34 | 1.434    |
| nc35  | 1.346113 |
| ncc35 | 118.780  |
| dih35 | -0.062   |
| cn36  | 1.310488 |
| cnc36 | 119.679  |

|       |          |
|-------|----------|
| dih36 | -0.575   |
| nc37  | 1.357323 |
| ncc37 | 105.512  |
| dih37 | -179.983 |
| cn38  | 1.378749 |
| cnc38 | 106.156  |
| dih38 | 0.950    |
| nc39  | 1.305638 |
| ncn39 | 113.189  |
| dih39 | -1.174   |
| nc40  | 1.335565 |
| ncc40 | 122.084  |
| dih40 | 0.283    |
| oc41  | 1.245821 |
| occ41 | 120.838  |
| dih41 | 179.766  |
| cc42  | 1.452998 |
| ccc42 | 132.022  |
| dih42 | -180.000 |
| oc43  | 1.350485 |
| occ43 | 112.213  |
| dih43 | 0.483    |
| co44  | 1.421189 |
| coc44 | 114.275  |
| dih44 | -179.746 |
| oc45  | 1.215948 |
| occ45 | 124.515  |
| dih45 | -179.596 |
| hc46  | 1.093187 |
| hcn46 | 106.955  |
| dih46 | -146.600 |
| hc47  | 1.093623 |
| hcn47 | 108.333  |
| dih47 | -30.962  |
| hc48  | 1.100153 |
| hcc48 | 108.411  |
| dih48 | 48.790   |
| hc49  | 1.081676 |
| hcc49 | 121.577  |
| dih49 | 179.885  |
| hc50  | 1.096966 |
| hcc50 | 109.428  |
| dih50 | 160.571  |
| hc51  | 1.091403 |
| hcc51 | 114.526  |
| dih51 | 38.534   |
| hc52  | 1.085888 |
| hcn52 | 118.763  |
| dih52 | -178.986 |
| hn53  | 1.010230 |
| hnc53 | 124.198  |
| dih53 | -179.571 |
| hc54  | 1.082141 |
| hcc54 | 128.535  |
| dih54 | -0.547   |
| hn55  | 1.011834 |
| hnc55 | 121.011  |
| dih55 | -14.153  |
| hc56  | 1.081304 |
| hcc56 | 126.191  |
| dih56 | -1.796   |
| hc57  | 1.083565 |
| hcc57 | 120.382  |
| dih57 | 0.465    |

|       |          |
|-------|----------|
| hn58  | 1.008097 |
| hnc58 | 120.110  |
| dih58 | 1.118    |
| hn59  | 1.008013 |
| hnc59 | 119.639  |
| dih59 | 179.396  |
| hc60  | 1.082032 |
| hcn60 | 126.074  |
| dih60 | -178.448 |
| hn61  | 1.015513 |
| hnc61 | 128.699  |
| dih61 | 171.514  |
| hc62  | 1.090962 |
| hco62 | 105.754  |
| dih62 | 179.692  |
| hc63  | 1.093911 |
| hco63 | 110.903  |
| dih63 | -60.616  |
| hc64  | 1.093785 |
| hco64 | 110.893  |
| dih64 | 60.026   |
| hc65  | 1.091246 |
| hco65 | 106.033  |
| dih65 | -179.288 |
| hc66  | 1.097989 |
| hco66 | 111.363  |
| dih66 | -60.481  |
| hc67  | 1.098066 |
| hco67 | 111.599  |
| dih67 | 61.739   |
| hc68  | 1.092191 |
| hco68 | 106.020  |
| dih68 | 177.862  |
| hc69  | 1.092833 |
| hco69 | 111.313  |
| dih69 | -62.987  |
| hc70  | 1.097995 |
| hco70 | 110.943  |
| dih70 | 59.297   |
| hc71  | 1.092023 |
| hco71 | 105.339  |
| dih71 | 165.912  |
| hc72  | 1.091467 |
| hco72 | 111.668  |
| dih72 | -74.589  |
| hc73  | 1.096410 |
| hco73 | 110.921  |
| dih73 | 48.000   |

Number of imaginary frequency:1

### Complete reference 31:

M. J. Frisch, G. W. Trucks, H. B. Schlegel, G. E. Scuseria, M. A. Robb, J. R. Cheeseman, J. A. Montgomery, Jr., T. Vreven, K. N. Kudin, J. C. Burant, J. M. Millam, S. S. Iyengar, J. Tomasi, V. Barone, B. Mennucci, M. Cossi, G. Scalmani, N. Rega, G. A. Petersson, H. Nakatsuji, M. Hada, M. Ehara, K. Toyota, R. Fukuda, J. Hasegawa, M. Ishida, T. Nakajima, Y. Honda, O. Kitao, H. Nakai, M. Klene, X. Li, J. E. Knox, H. P. Hratchian, J. B. Cross, C. Adamo, J. Jaramillo, R. Gomperts, R. E. Stratmann, O. Yazyev, A. J. Austin, R. Cammi, C. Pomelli, J. W. Ochterski, P. Y. Ayala, K. Morokuma, G. A. Voth, P. Salvador, J. J. Dannenberg, V.G. Zakrewski, S. Dapprich, A. D. Daniels, M. C. Strain, O. Farkas, D. K. Malick, A. D. Rabuck, K. Raghavachari, J. B. Foresman, J. V. Ortiz, Q. Cui, A. G. Baboul, S. Clifford, J. Cioslowski, B. B. Stefanov, G. Liu, A. Liashenko, P. Piskorz, I. Komaromi, R. L. Martin, D. J. Fox, T. Keith, M. A. Al-Laham, C. Y. Peng, A. Nanayakkara, M. Challacombe, P. M. W. Gill, B. Johnson, W. Chen, M. W. Wong, C. Gonzalez, and J. A. Pople, *Gaussian 03, Revision B.4*, Gaussian, Inc., Pittsburgh PA, **2003**.
